# Supplementary material for: New N-acyl- as well as N-phosphonoylmethyl- and N-phosphinoylmethyl-α-amino-benzylphosphonates by acylation and a tandem Kabachnik–Fields protocol
Source: Royal Society of Chemistry journal article supplement (doi:10.1039/d3ob00010a), 2023-01-01

## Supplementary Information

### ***N*-Acyl-, as well as *N*-phosphonomethyl- and *N*-phosphinoylmethyl- $\alpha$ -aminophosphonates; A new tandem Kabachnik–Fields protocol**

Petra Regina Varga,<sup>a</sup> Konstantin Karaghiosoff,<sup>b</sup> Éva Viktória Sári,<sup>a</sup> András Simon,<sup>c</sup> László Hegedűs,<sup>a</sup> László Drahos<sup>d</sup> and György Keglevich\*<sup>a</sup>

<sup>a</sup>*Department of Organic Chemistry and Technology, Budapest University of Technology and Economics, 1521 Budapest, Hungary*

<sup>b</sup>*Department Chemie, Ludwig-Maximilians-Universität München, D-81377 München, Butenandtstr. 5-13, Germany*

<sup>c</sup>*Research Centre for Natural Sciences, MS Proteomics Research Group, 1117 Budapest, Hungary*

<sup>d</sup>*MS Proteomics Research Group, Research Centre for Natural Sciences, 1117, Budapest, Hungary*

#### Contents

|      |                                                                                                                                                                          |    |
|------|--------------------------------------------------------------------------------------------------------------------------------------------------------------------------|----|
| 1.)  | <sup>31</sup> P-, <sup>13</sup> C and <sup>1</sup> H NMR spectra of the products ( <b>3a</b> , <b>3b</b> , <b>4a</b> , <b>4b</b> , <b>5a-f</b> , <b>6</b> and <b>8</b> ) | 3  |
|      | Diethyl (N-benzylacetamido)-benzylphosphonate ( <b>3a</b> )                                                                                                              | 3  |
|      | Diethyl (N-benzylbenzamido)-benzylphosphonate ( <b>3b</b> )                                                                                                              | 6  |
|      | Diethyl acetamido-benzylphosphonate ( <b>4a</b> )                                                                                                                        | 7  |
|      | Diethyl propioamido-benzylphosphonate ( <b>4b</b> )                                                                                                                      | 10 |
|      | Diethyl diethylphosphonomethyl-benzyl-amino-benzylphosphonate ( <b>5a</b> )                                                                                              | 13 |
|      | Diethyl diethylphosphonomethyl-benzyl-amino-4-chlorobenzylphosphonate ( <b>5b</b> )                                                                                      | 16 |
|      | Diethyl diethylphosphonomethyl-benzyl-amino-4-methylbenzylphosphonate ( <b>5c</b> )                                                                                      | 19 |
|      | Diethyl diphenylphosphinoylmethyl-benzyl-amino-benzylphosphonate ( <b>5d</b> )                                                                                           | 22 |
|      | Diethyl bis(4-methylphenyl)phosphinoylmethyl-benzyl-amino-benzylphosphonate ( <b>5e</b> )                                                                                | 25 |
|      | Diethyl bis(3,5-dimethylphenyl)phosphinoylmethyl-benzyl-amino-benzylphosphonate ( <b>5f</b> )                                                                            | 28 |
|      | Bis(diethylphosphono-phenylmethyl)amine ( <b>6</b> )                                                                                                                     | 31 |
|      | Bis(diethylphosphonomethyl)-(diethylphosphono-phenyl)amine ( <b>8</b> )                                                                                                  | 34 |
| 2.1) | Experimental parameters and identification of the starting materials ( <b>1a-c</b> )                                                                                     | 37 |
| 2.2) | <sup>31</sup> P NMR of starting materials ( <b>1a</b> , <b>1b</b> and <b>1c</b> )                                                                                        | 38 |
|      | Diethyl $\alpha$ -benzylamino-benzylphosphonate ( <b>1a</b> )                                                                                                            | 38 |
|      | Diethyl $\alpha$ -benzylamino-4-chlorobenzylphosphonate ( <b>1b</b> )                                                                                                    | 39 |
|      | Diethyl $\alpha$ -benzylamino-4-methylbenzylphosphonate ( <b>1c</b> )                                                                                                    | 40 |
| 3.)  | <sup>13</sup> C and <sup>1</sup> H NMR data of compounds <b>5a</b> , <b>5b</b> , <b>5c</b> and <b>5d</b> obtained by a 2D NMR study                                      | 41 |
| 4.)  | <sup>1</sup> H and <sup>13</sup> C NMR spectra on the equilibrium of the rotamers of <b>3b</b>                                                                           | 45 |
|      | Segment of the <sup>1</sup> H NMR spectrum on the equilibrium of the rotamers of <b>3b</b>                                                                               | 45 |
|      | Segment of the <sup>13</sup> C NMR spectrum on the equilibrium of the rotamers of <b>3b</b>                                                                              | 46 |
|      | Segment of the HSQC NMR spectrum on the equilibrium of the rotamers of <b>3b</b>                                                                                         | 47 |
|      | Segment of the HMBC NMR spectrum on the equilibrium of the rotamers of <b>3b</b>                                                                                         | 48 |
|      | <sup>13</sup> C and <sup>1</sup> H NMR data for the two rotamers:                                                                                                        | 49 |

|                                                                        |    |
|------------------------------------------------------------------------|----|
| <b>3b-A (72%)</b> .....                                                | 49 |
| <sup>13</sup> C and <sup>1</sup> H NMR data for the two rotamers:..... | 50 |
| <b>3b-B (28%)</b> .....                                                | 50 |

# 1.) $^{31}\text{P}$ -, $^{13}\text{C}$ and $^1\text{H}$ NMR spectra of the products (3a, 3b, 4a, 4b, 5a-f, 6 and 8)

Diethyl (N-benzylacetamido)-benzylphosphonate (3a)

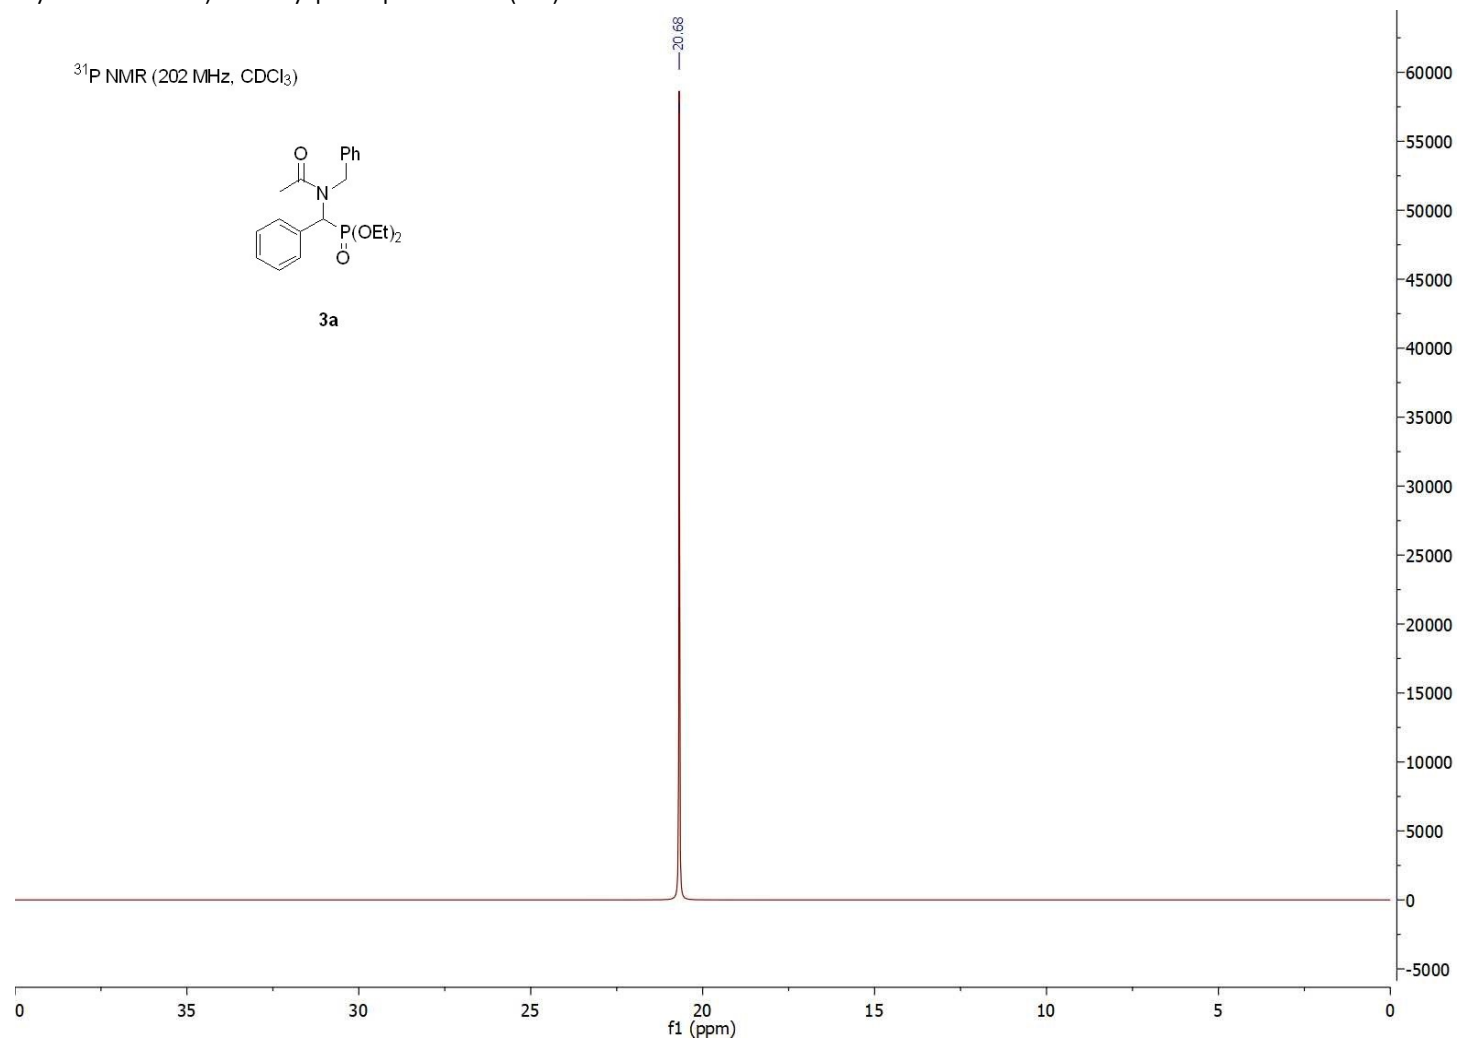

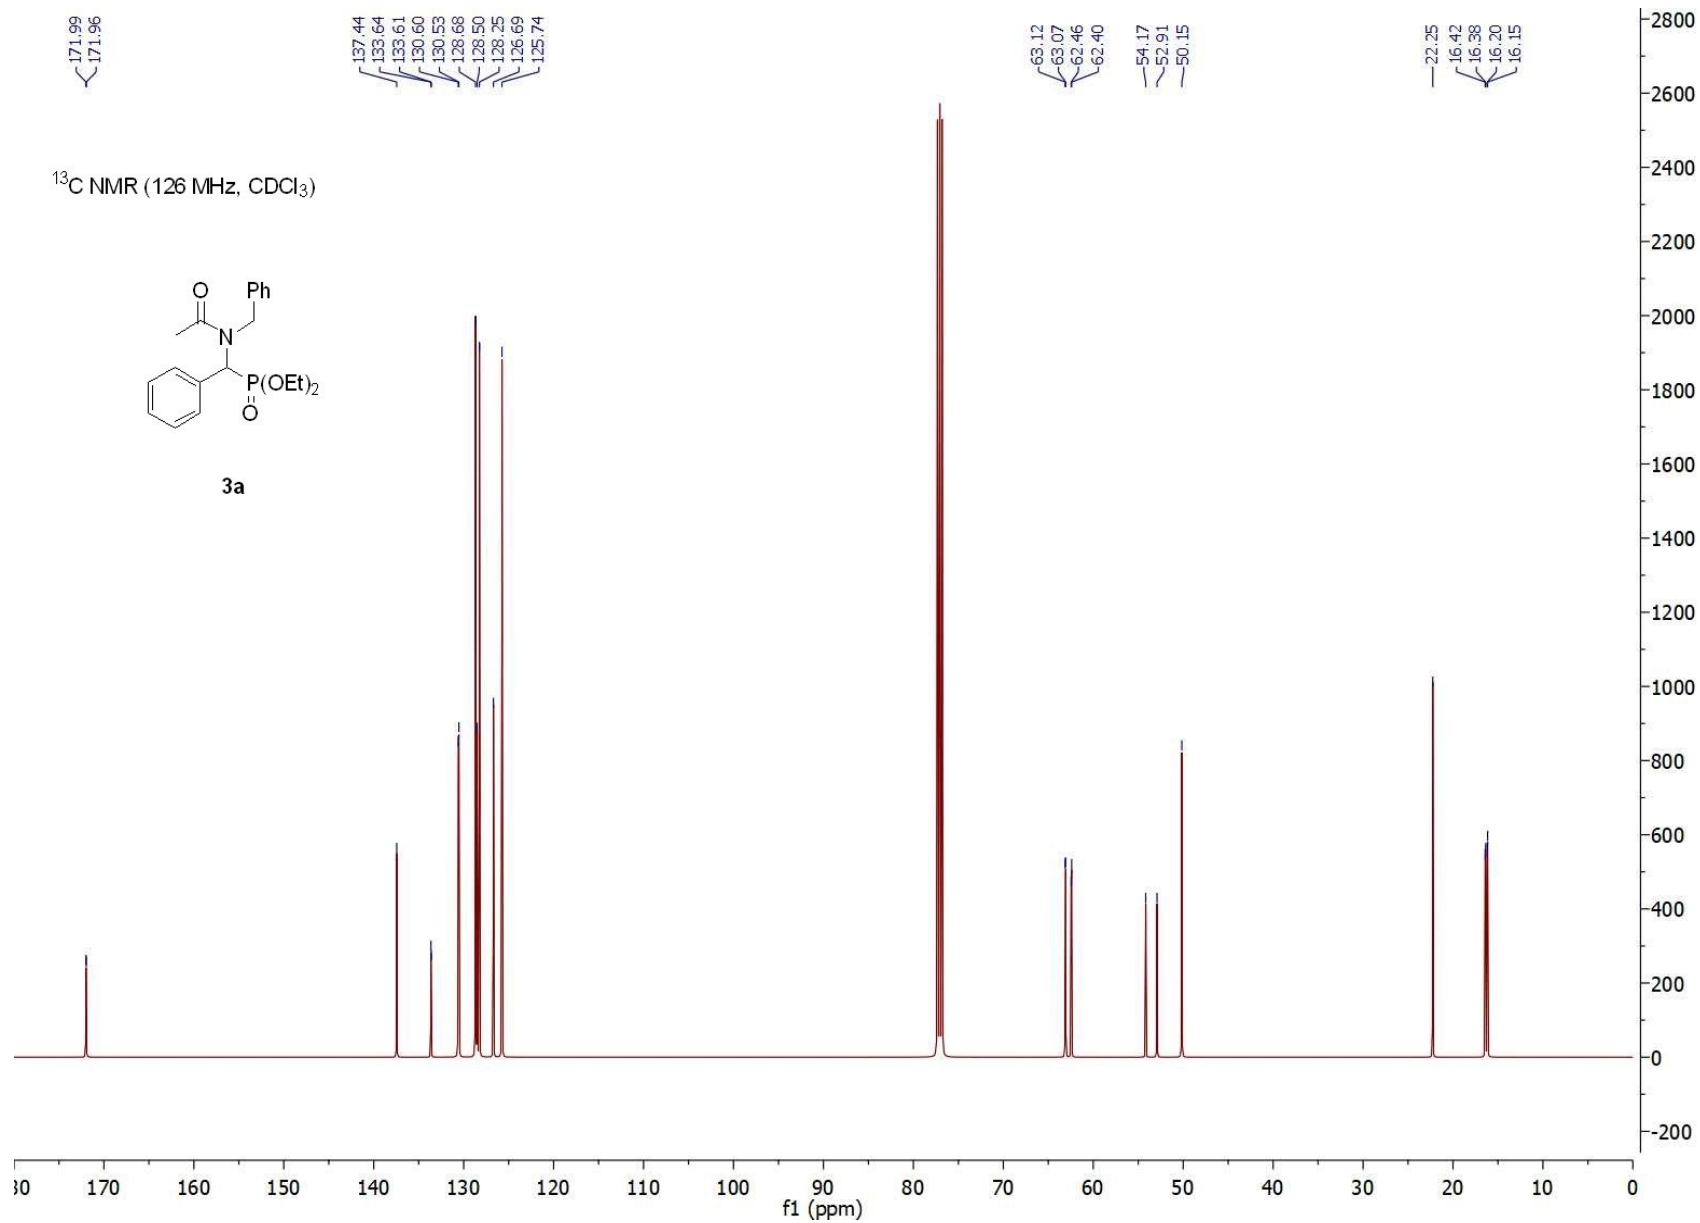

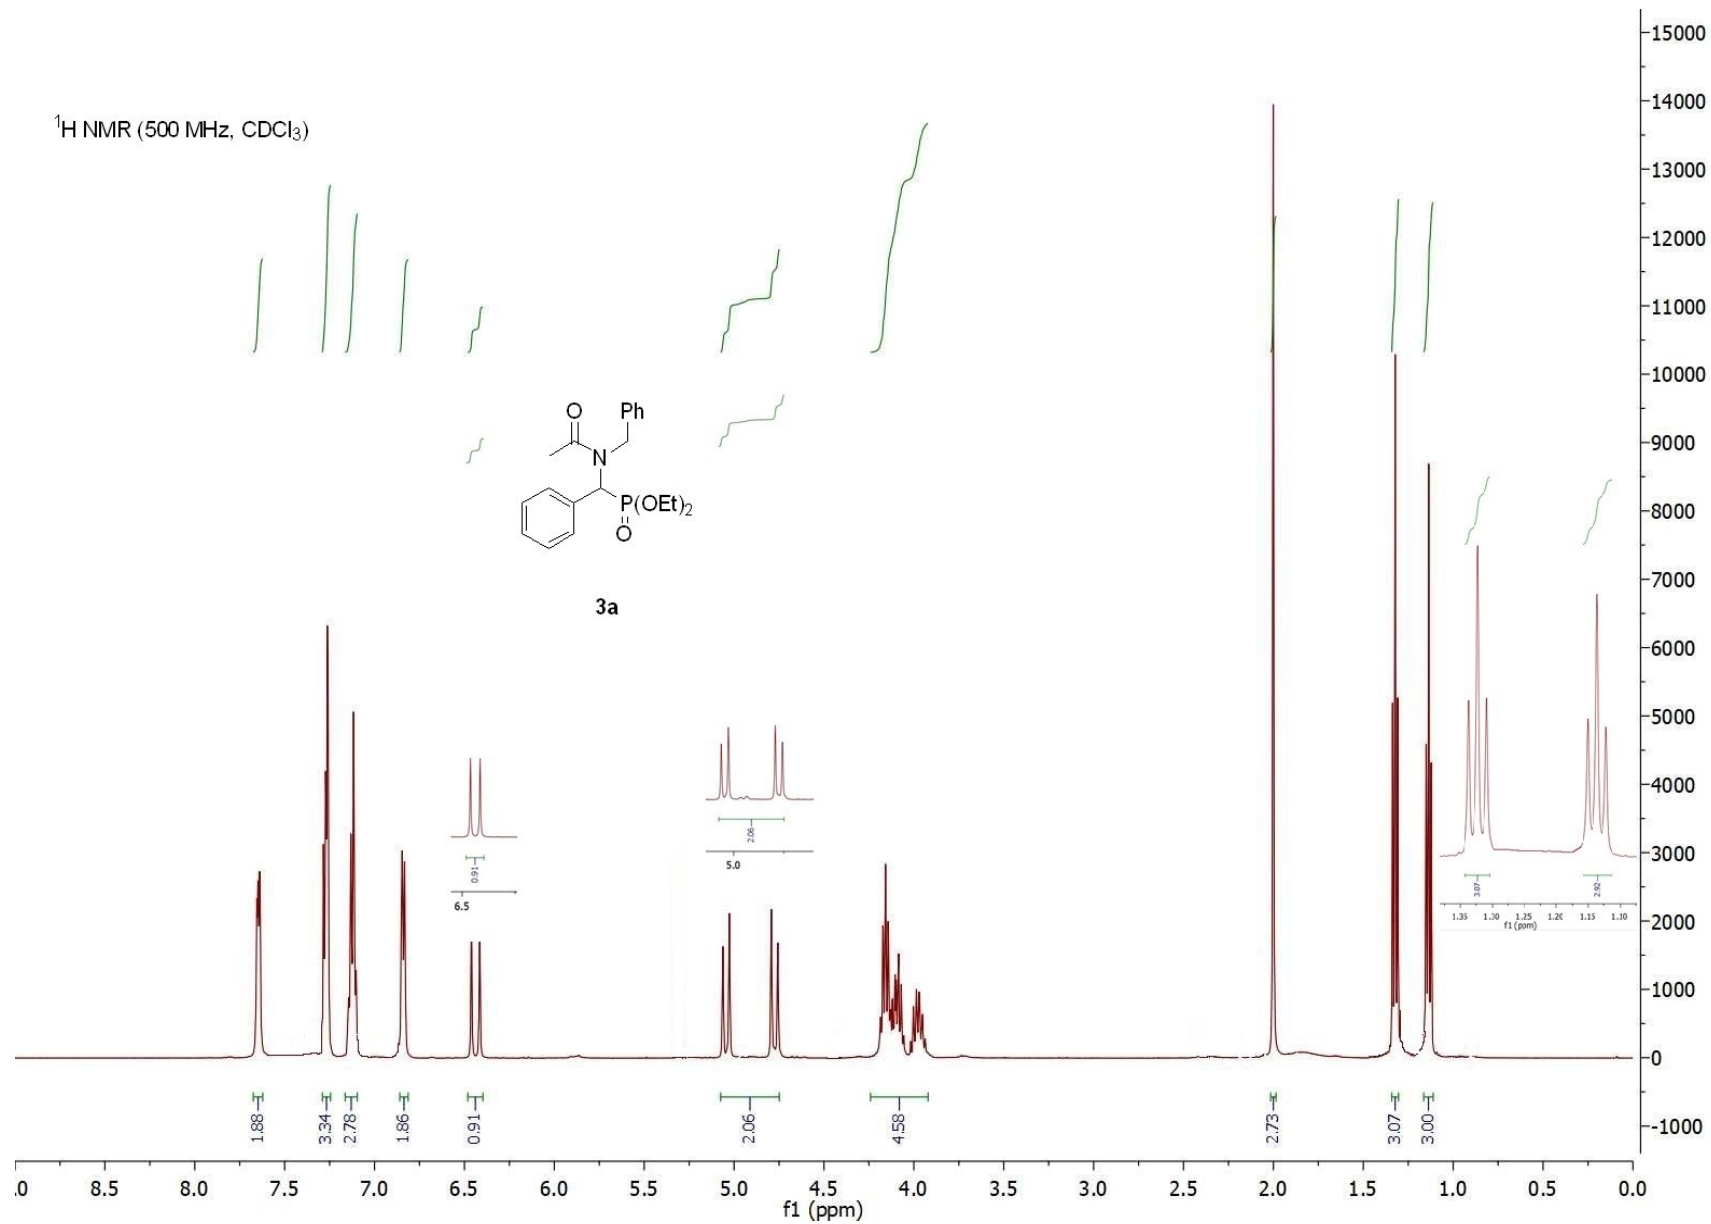

Diethyl (N-benzylbenzamido)-benzylphosphonate (**3b**)

$^{31}\text{P}$  NMR (202 MHz,  $\text{CDCl}_3$ )

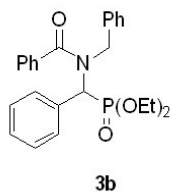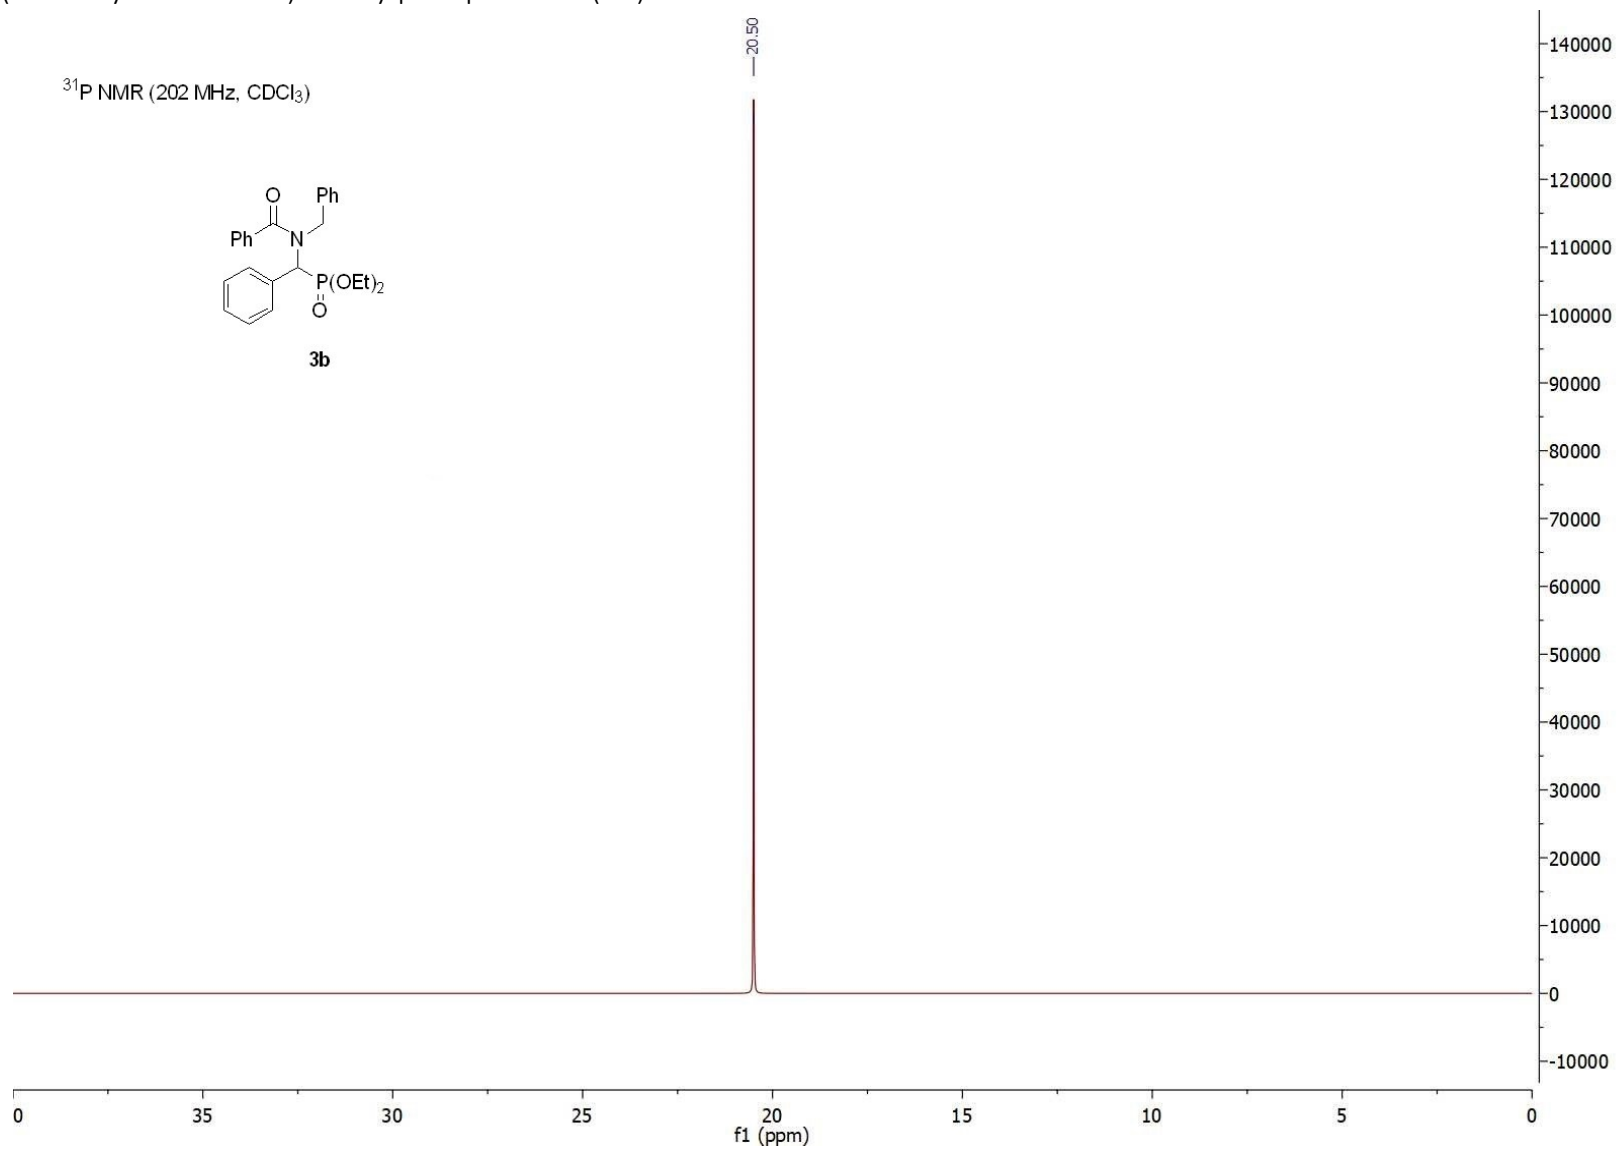

Diethyl acetamido-benzylphosphonate (**4a**)

$^{31}\text{P}$  NMR (202 MHz,  $\text{CDCl}_3$ )

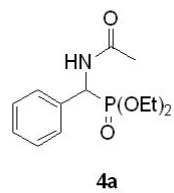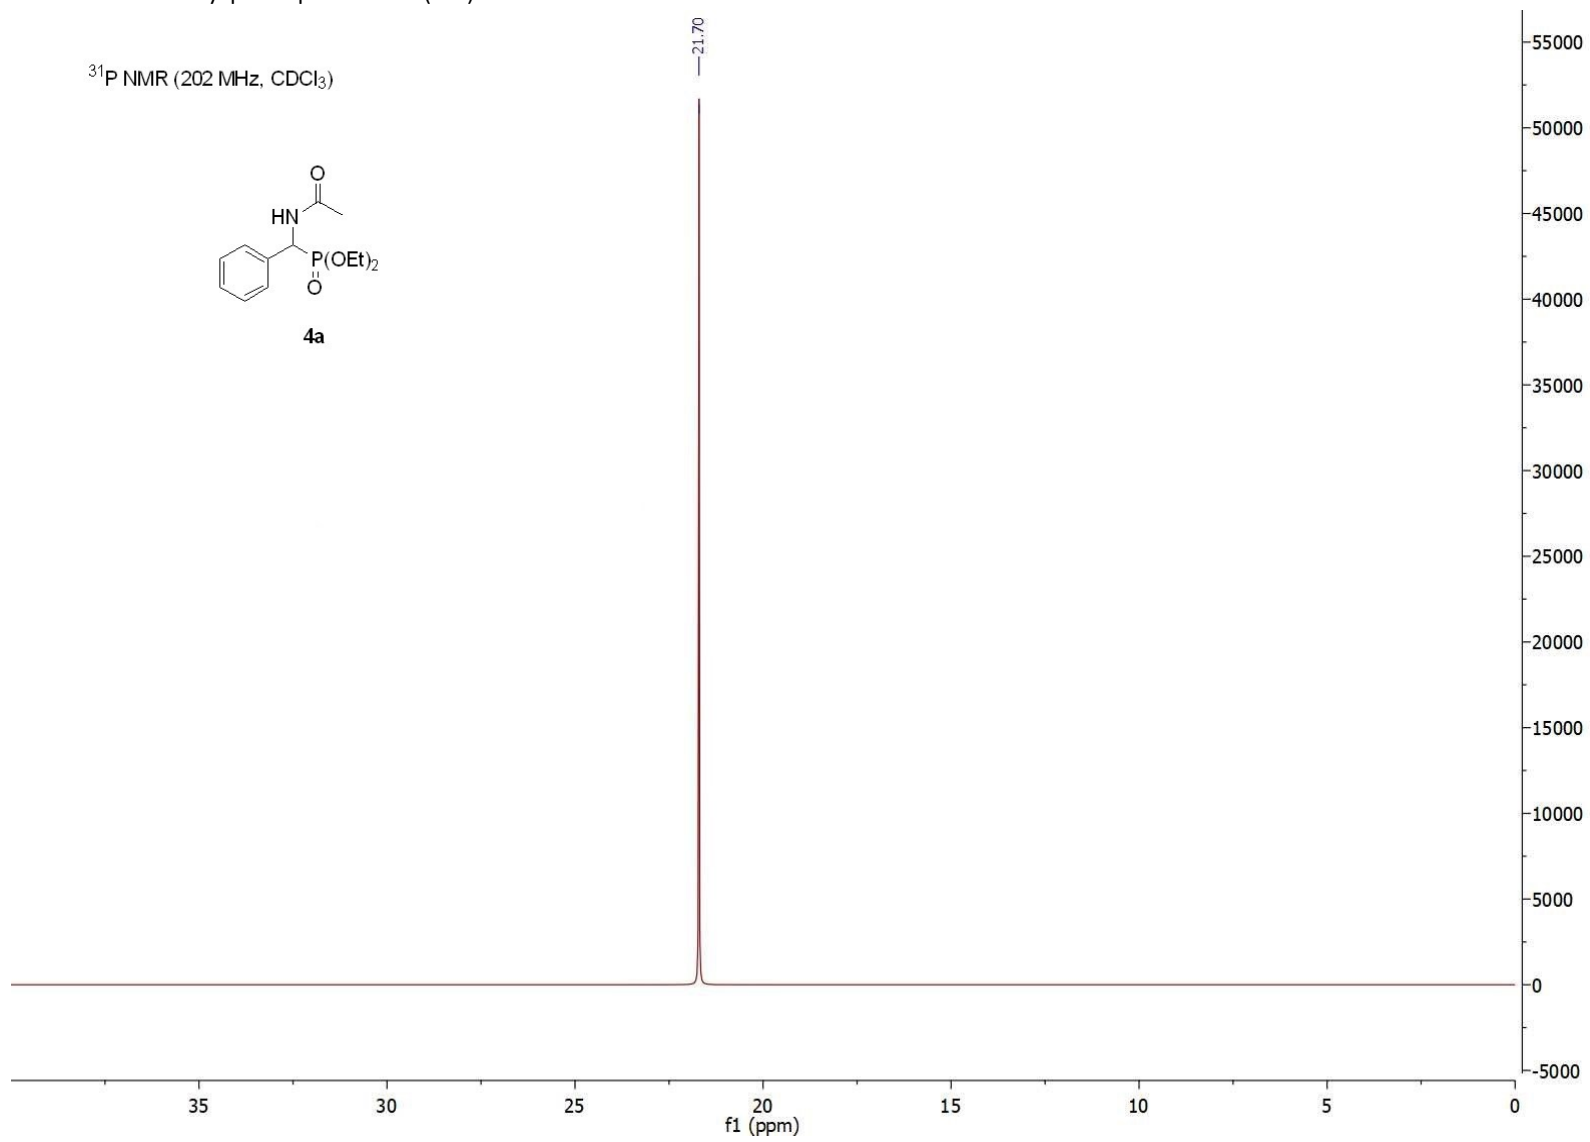

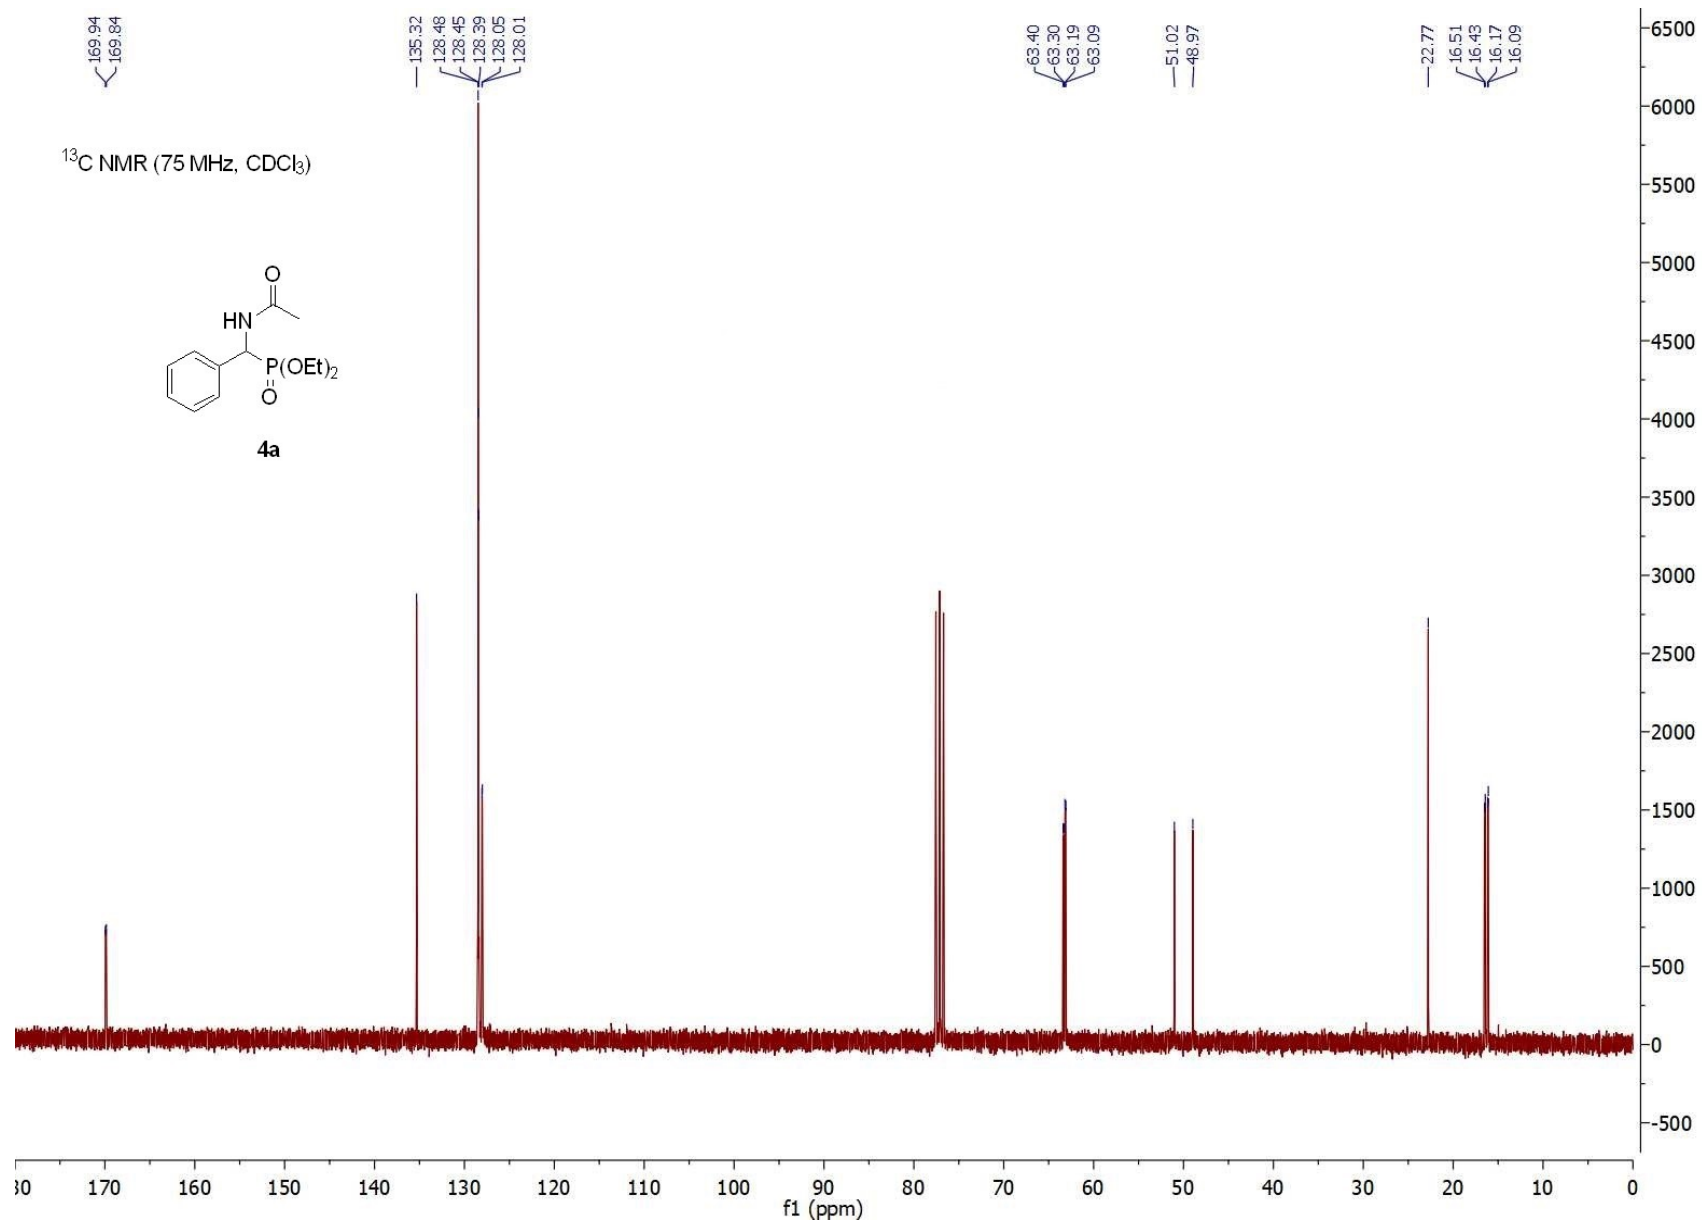



$^1\text{H}$  NMR (500 MHz,  $\text{CDCl}_3$ )

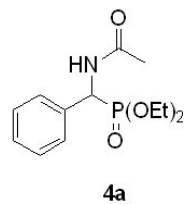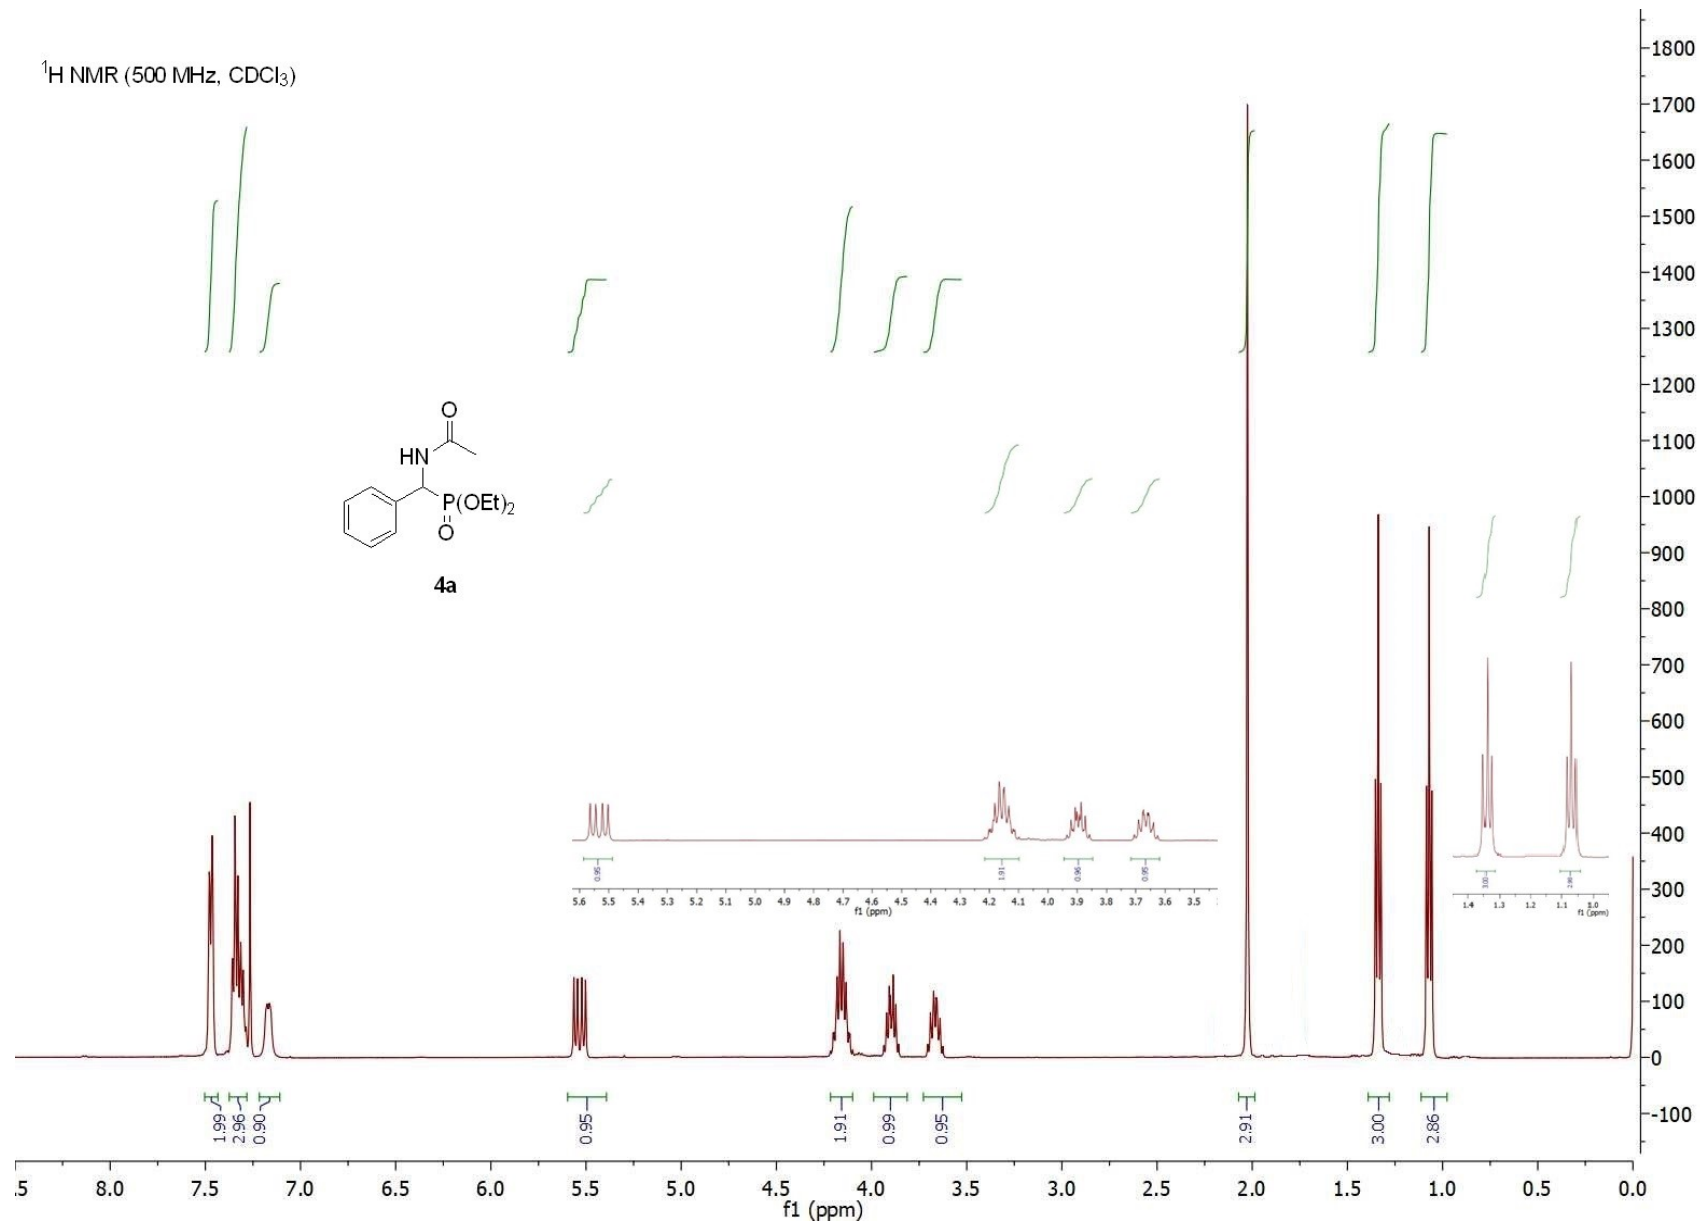

Diethyl propioamido-benzylphosphonate (**4b**)

$^{31}\text{P}$  NMR (202 MHz,  $\text{CDCl}_3$ )

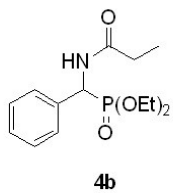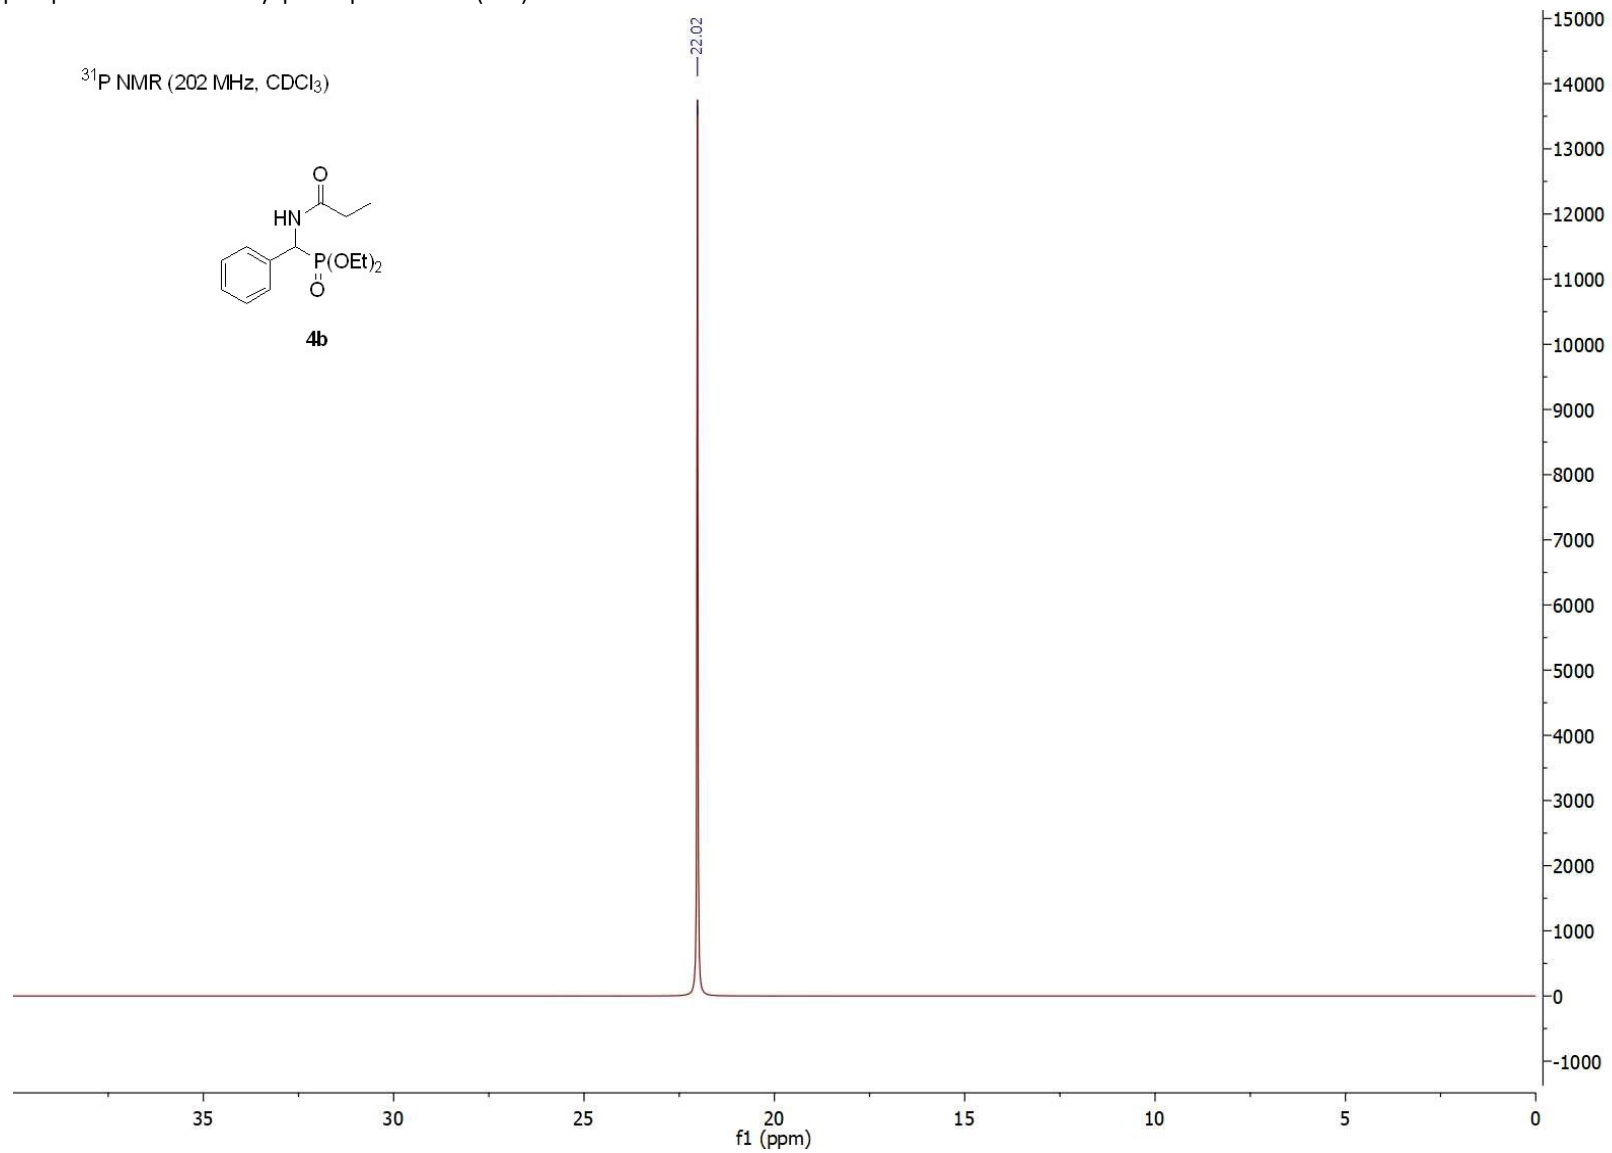

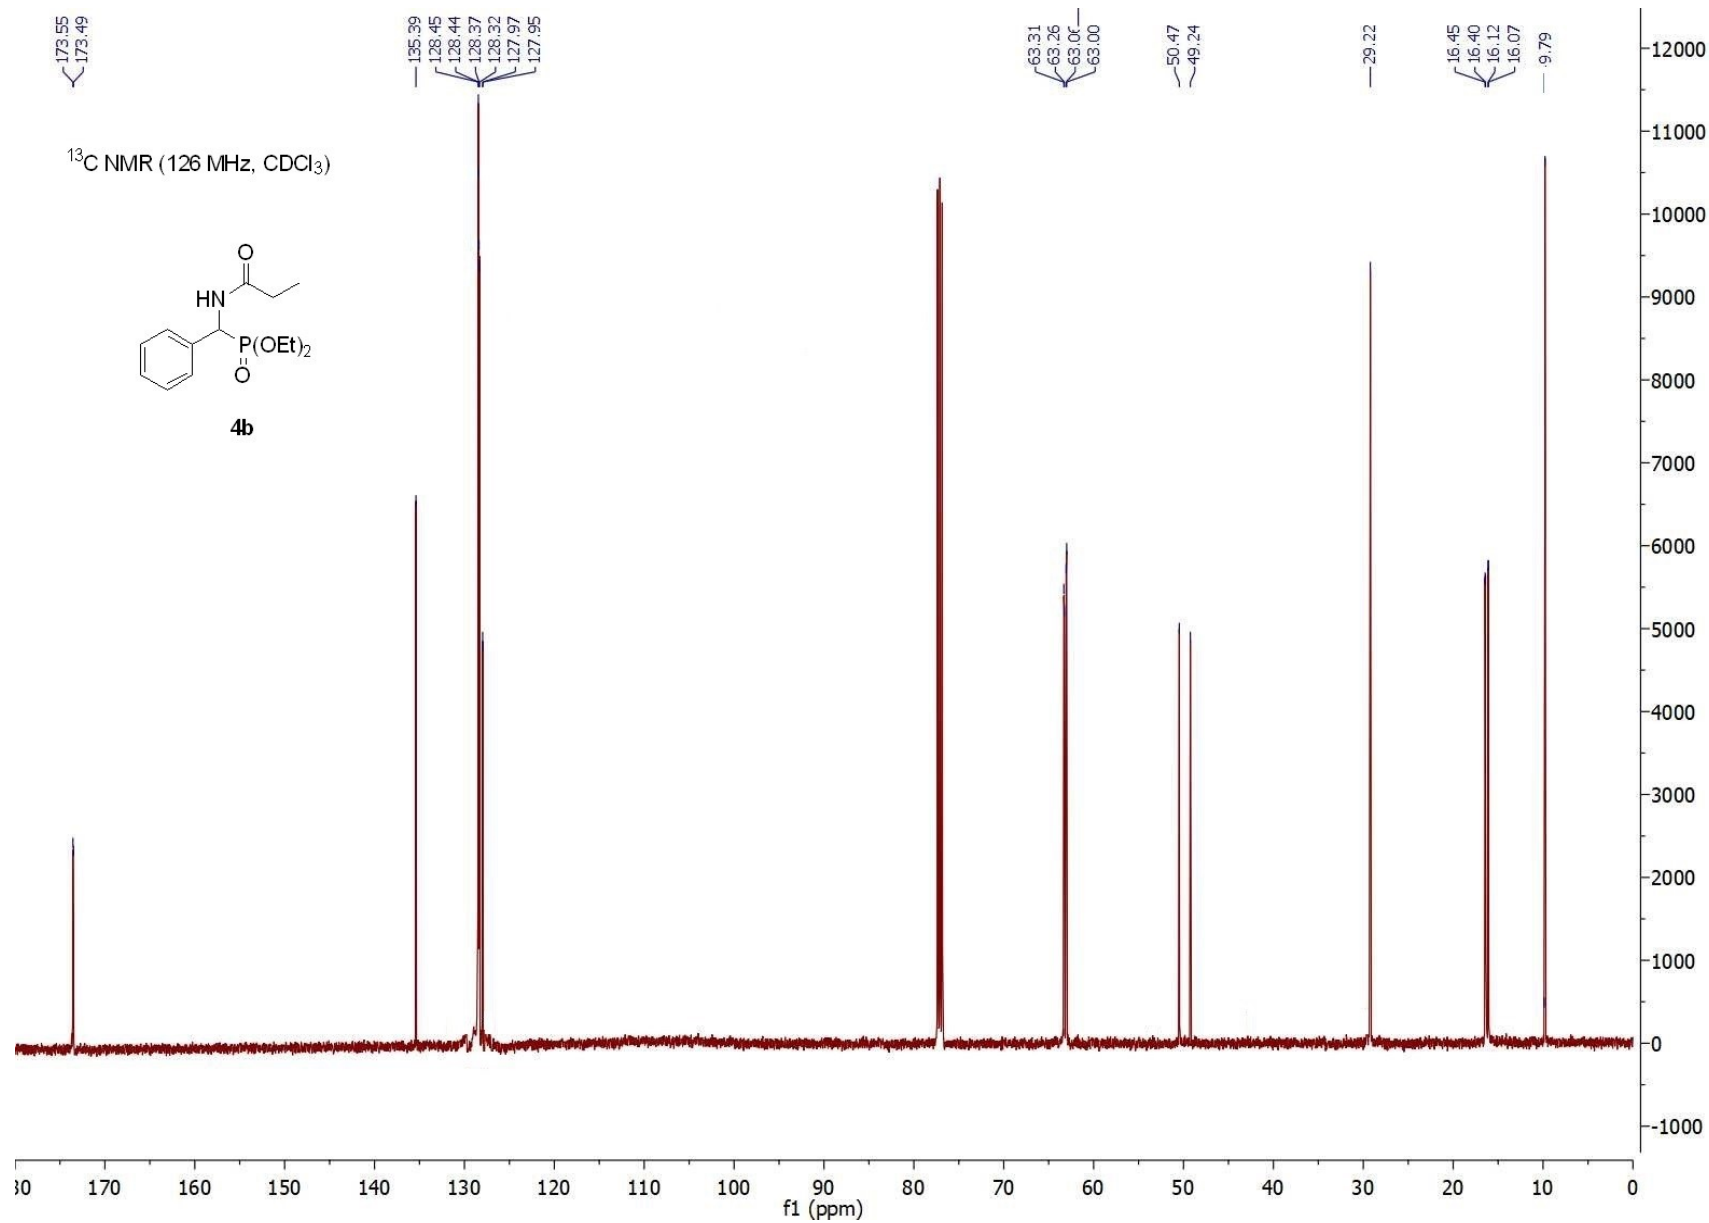

$^1\text{H}$  NMR (500 MHz,  $\text{CDCl}_3$ )

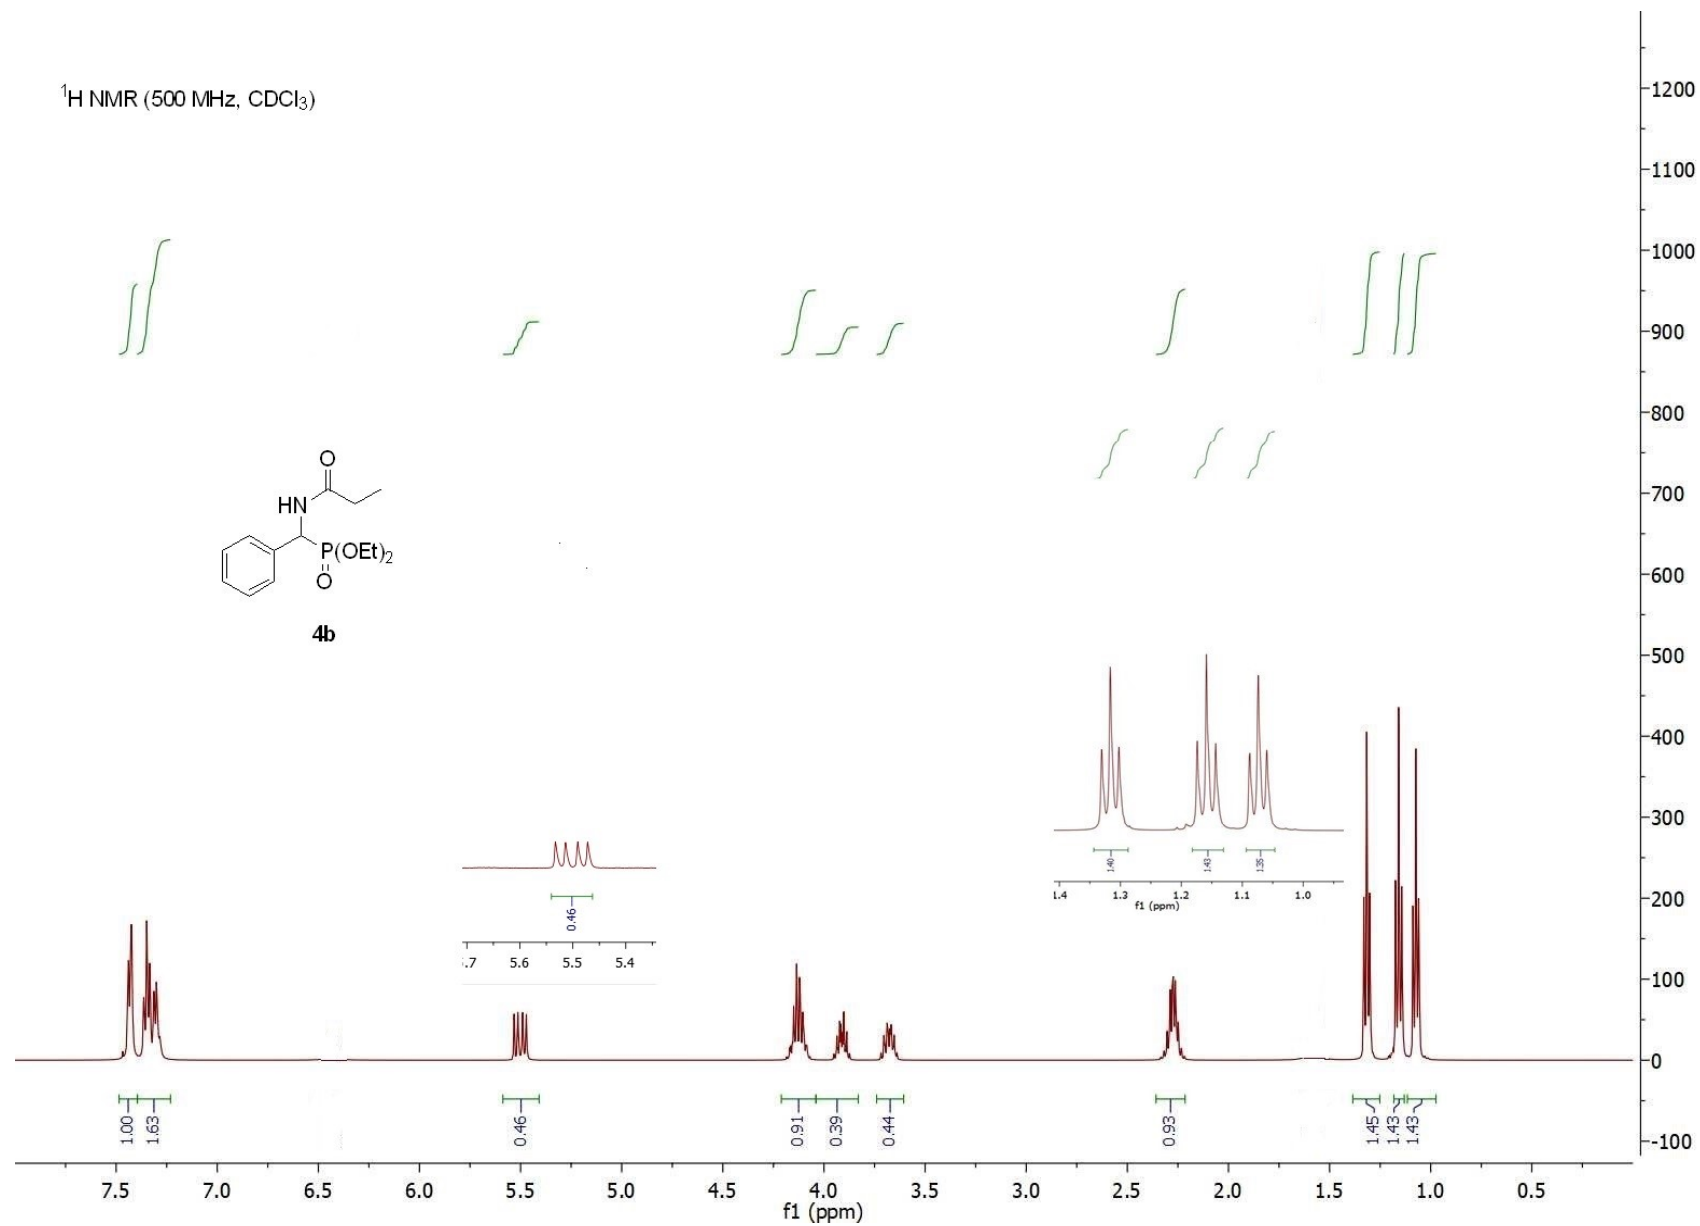

Diethyl diethylphosphonoylmethyl-.benzyl-amino-benzylphosphonate (**5a**)

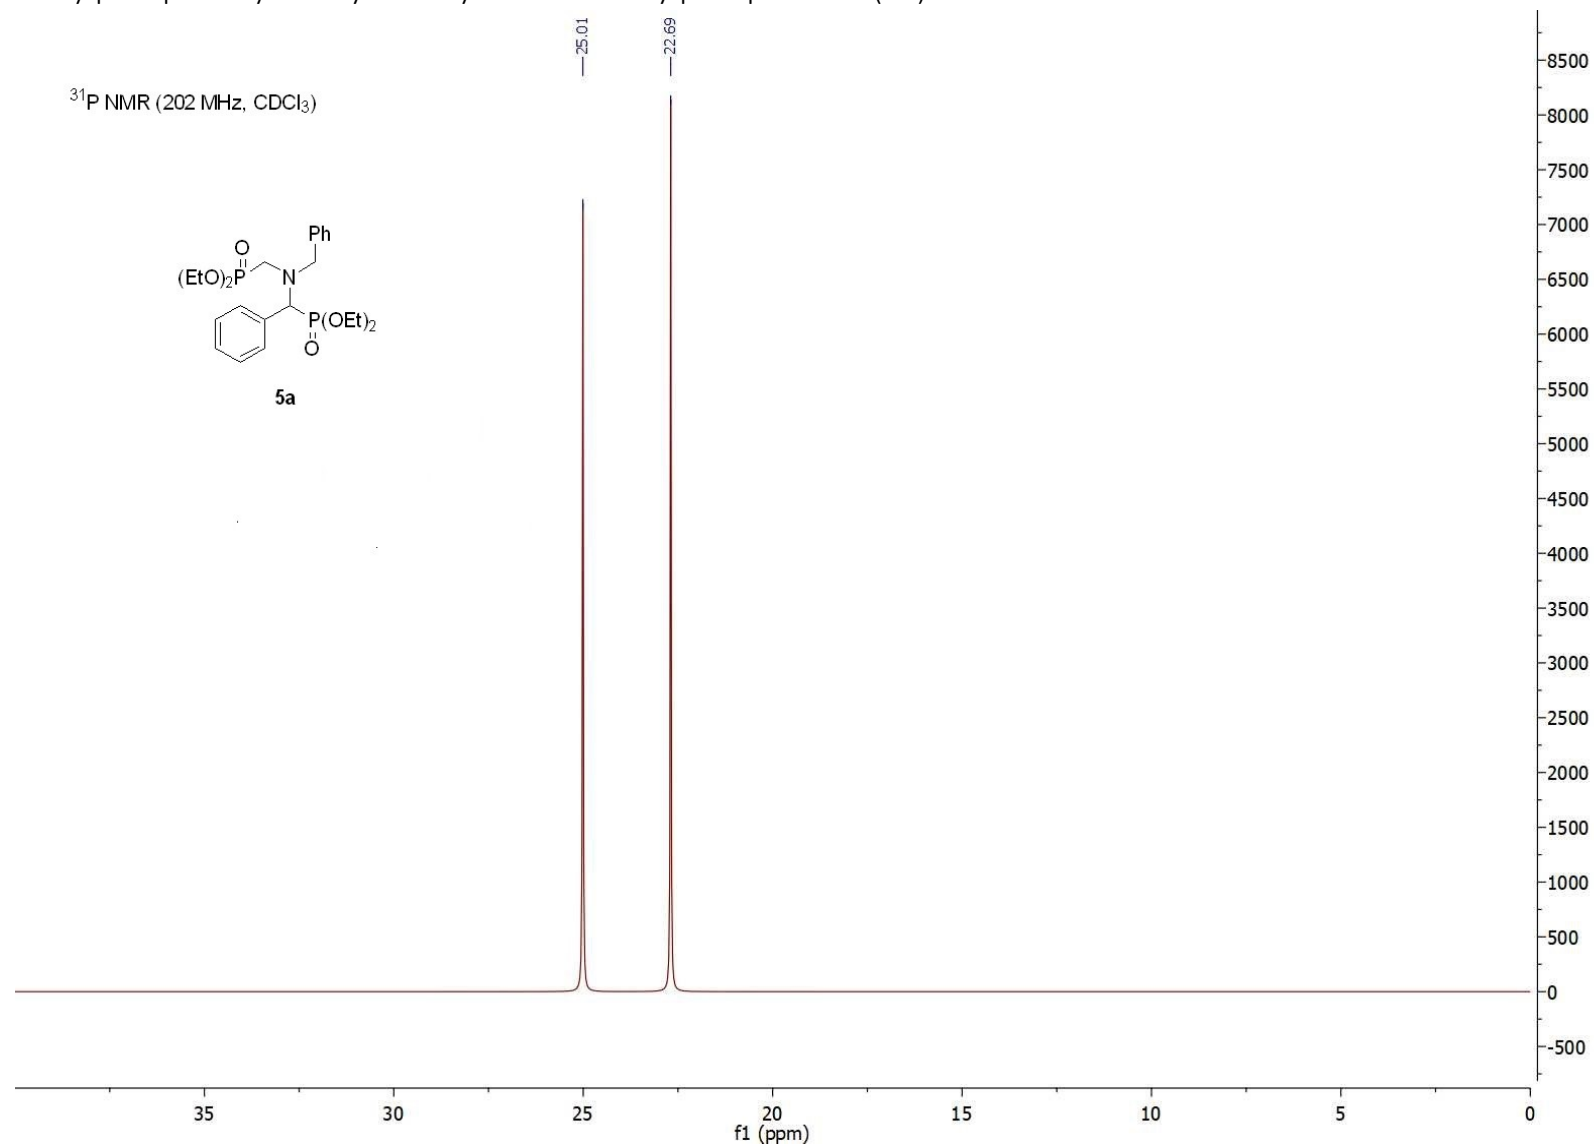

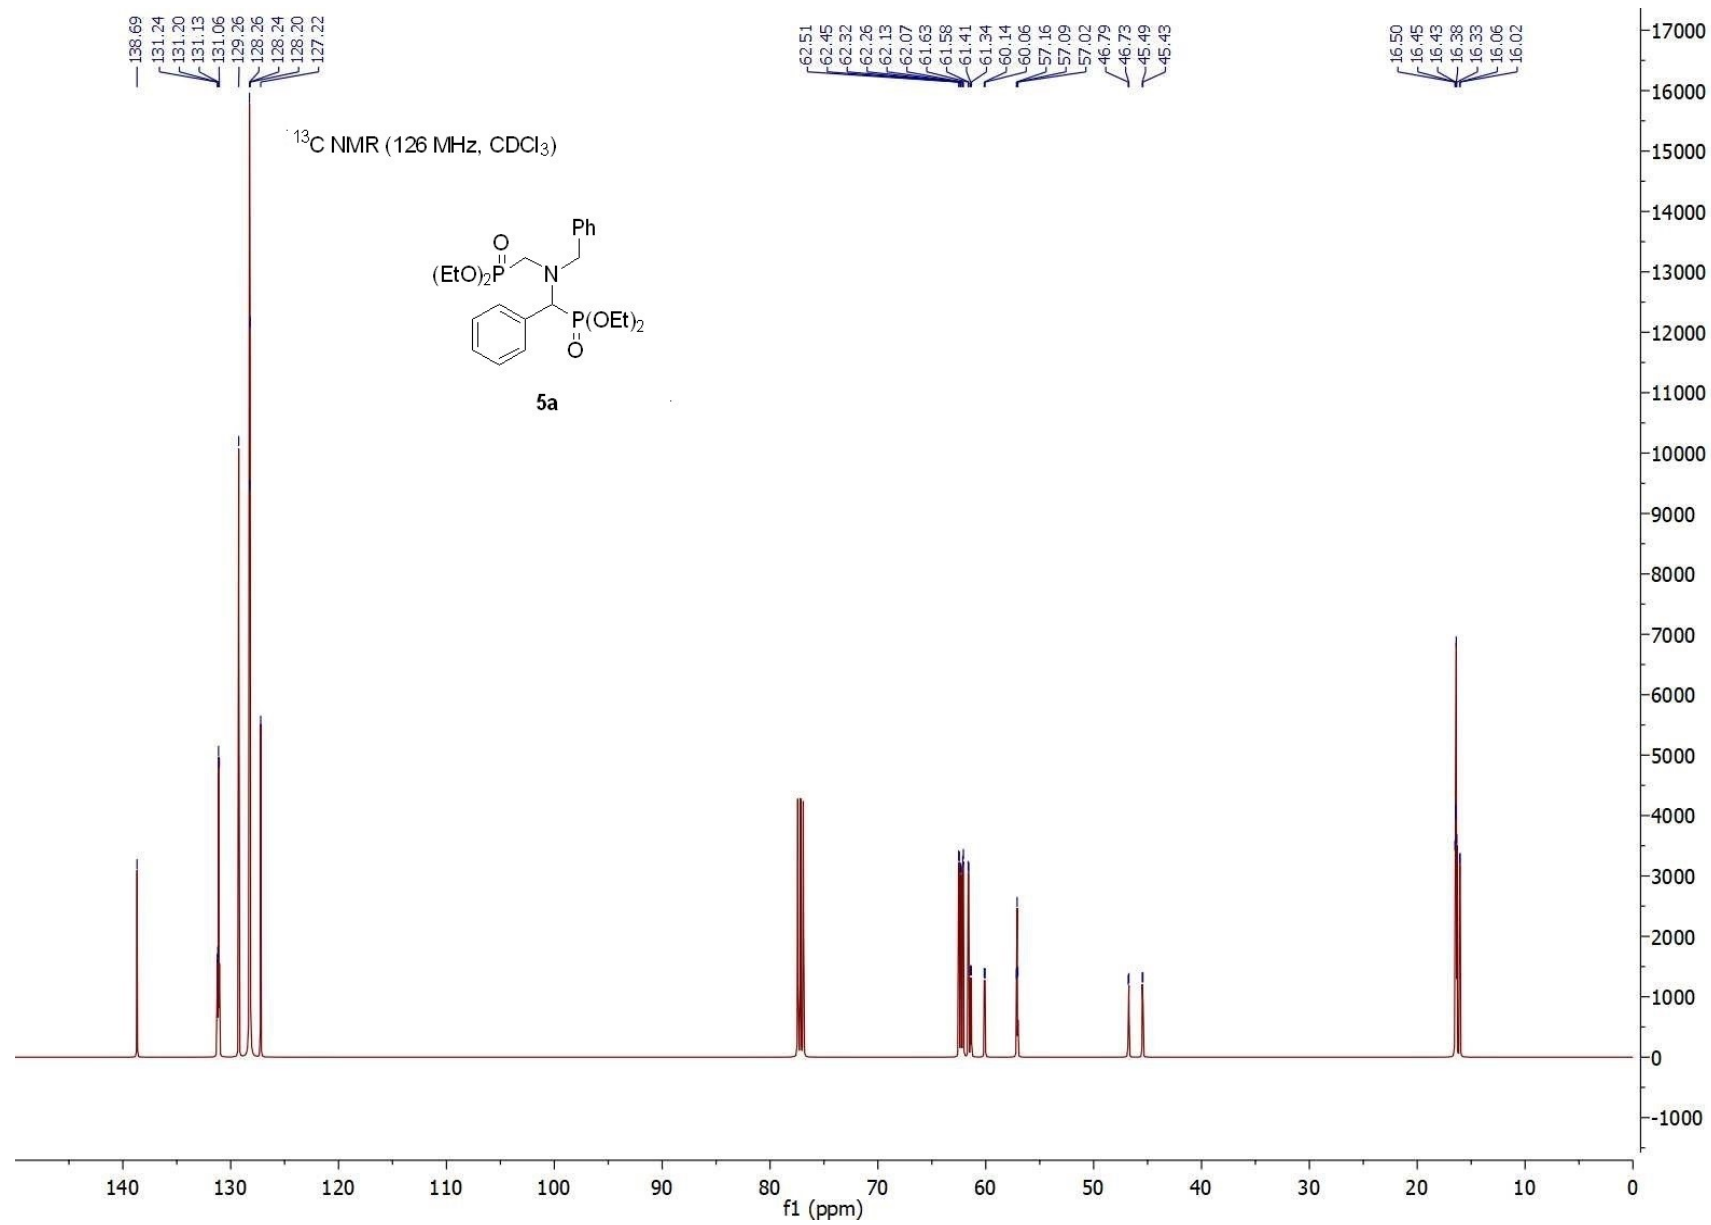

$^1\text{H}$  NMR (500 MHz,  $\text{CDCl}_3$ )

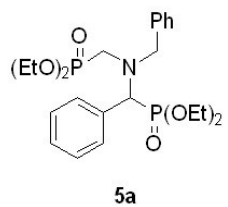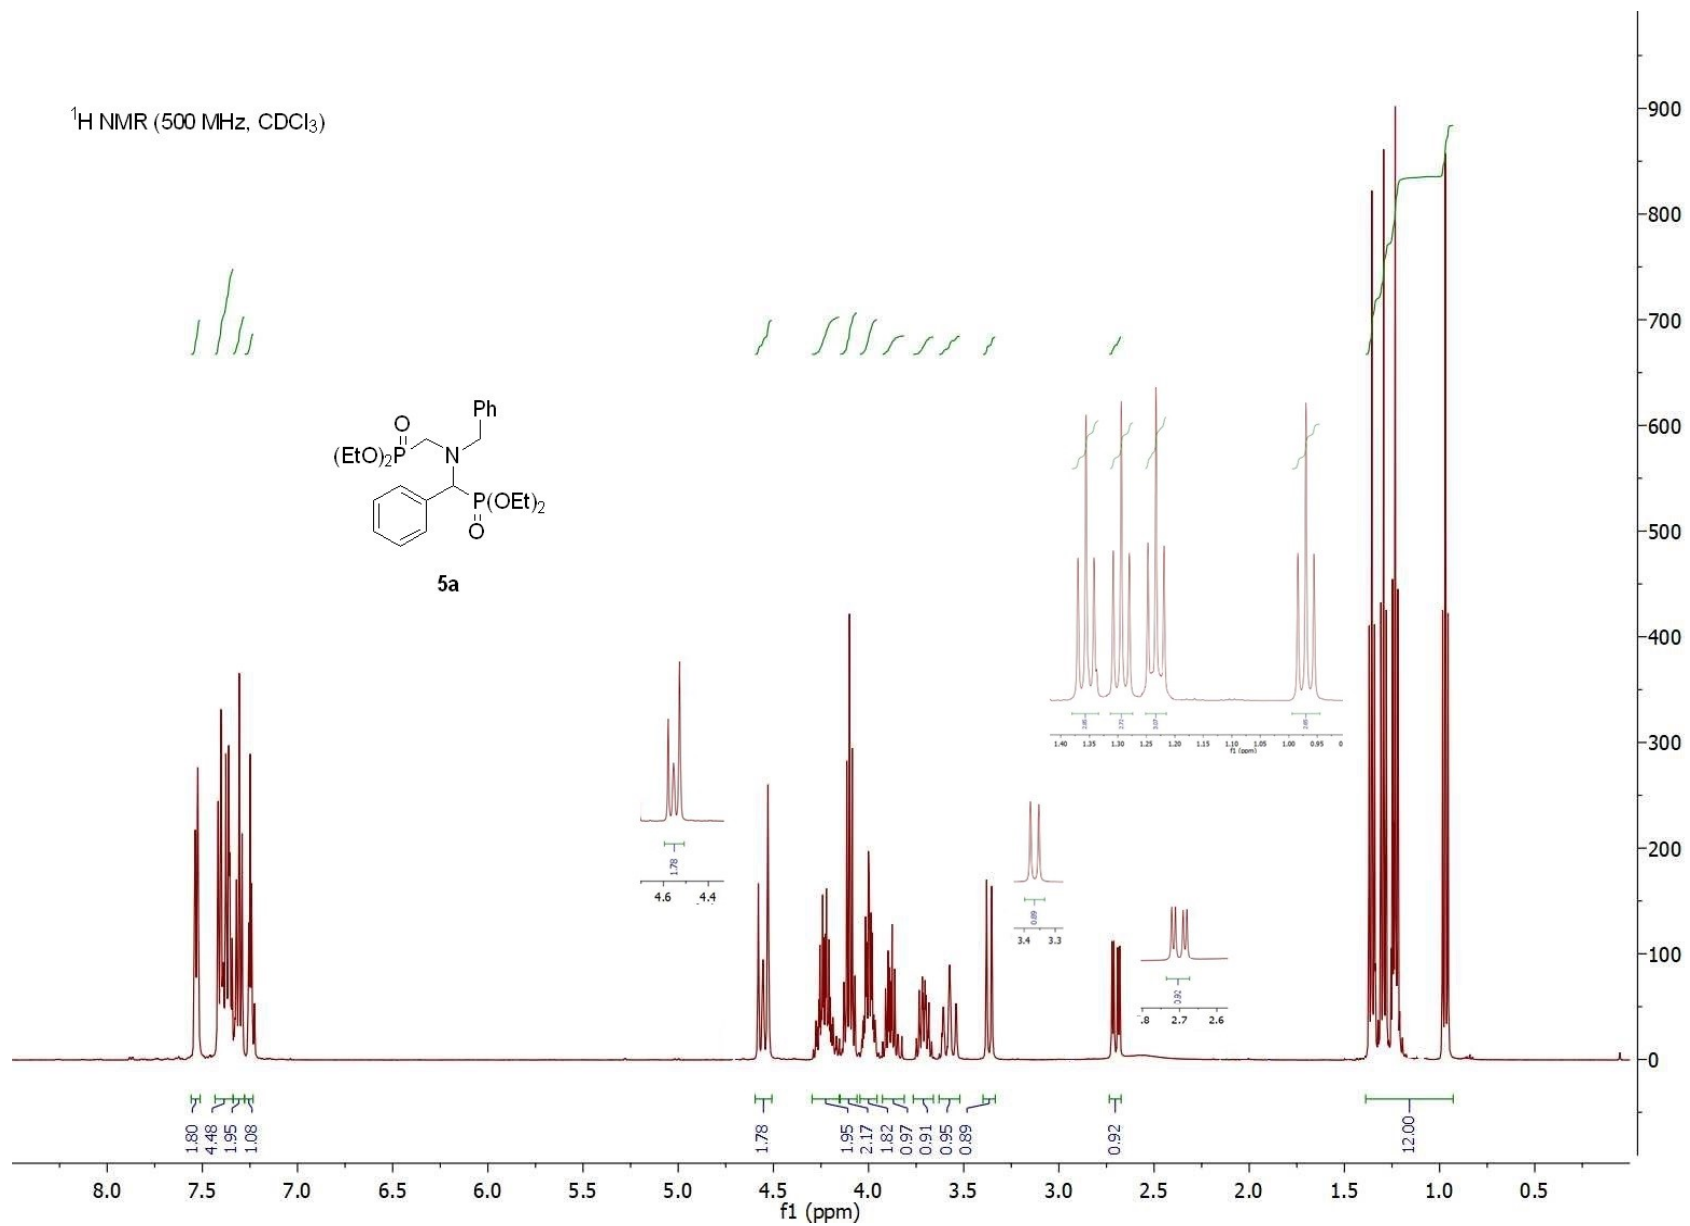

Diethyl diethylphosphonoylmethyl-benzyl-amino-4-chlorobenzylphosphonate (**5b**)

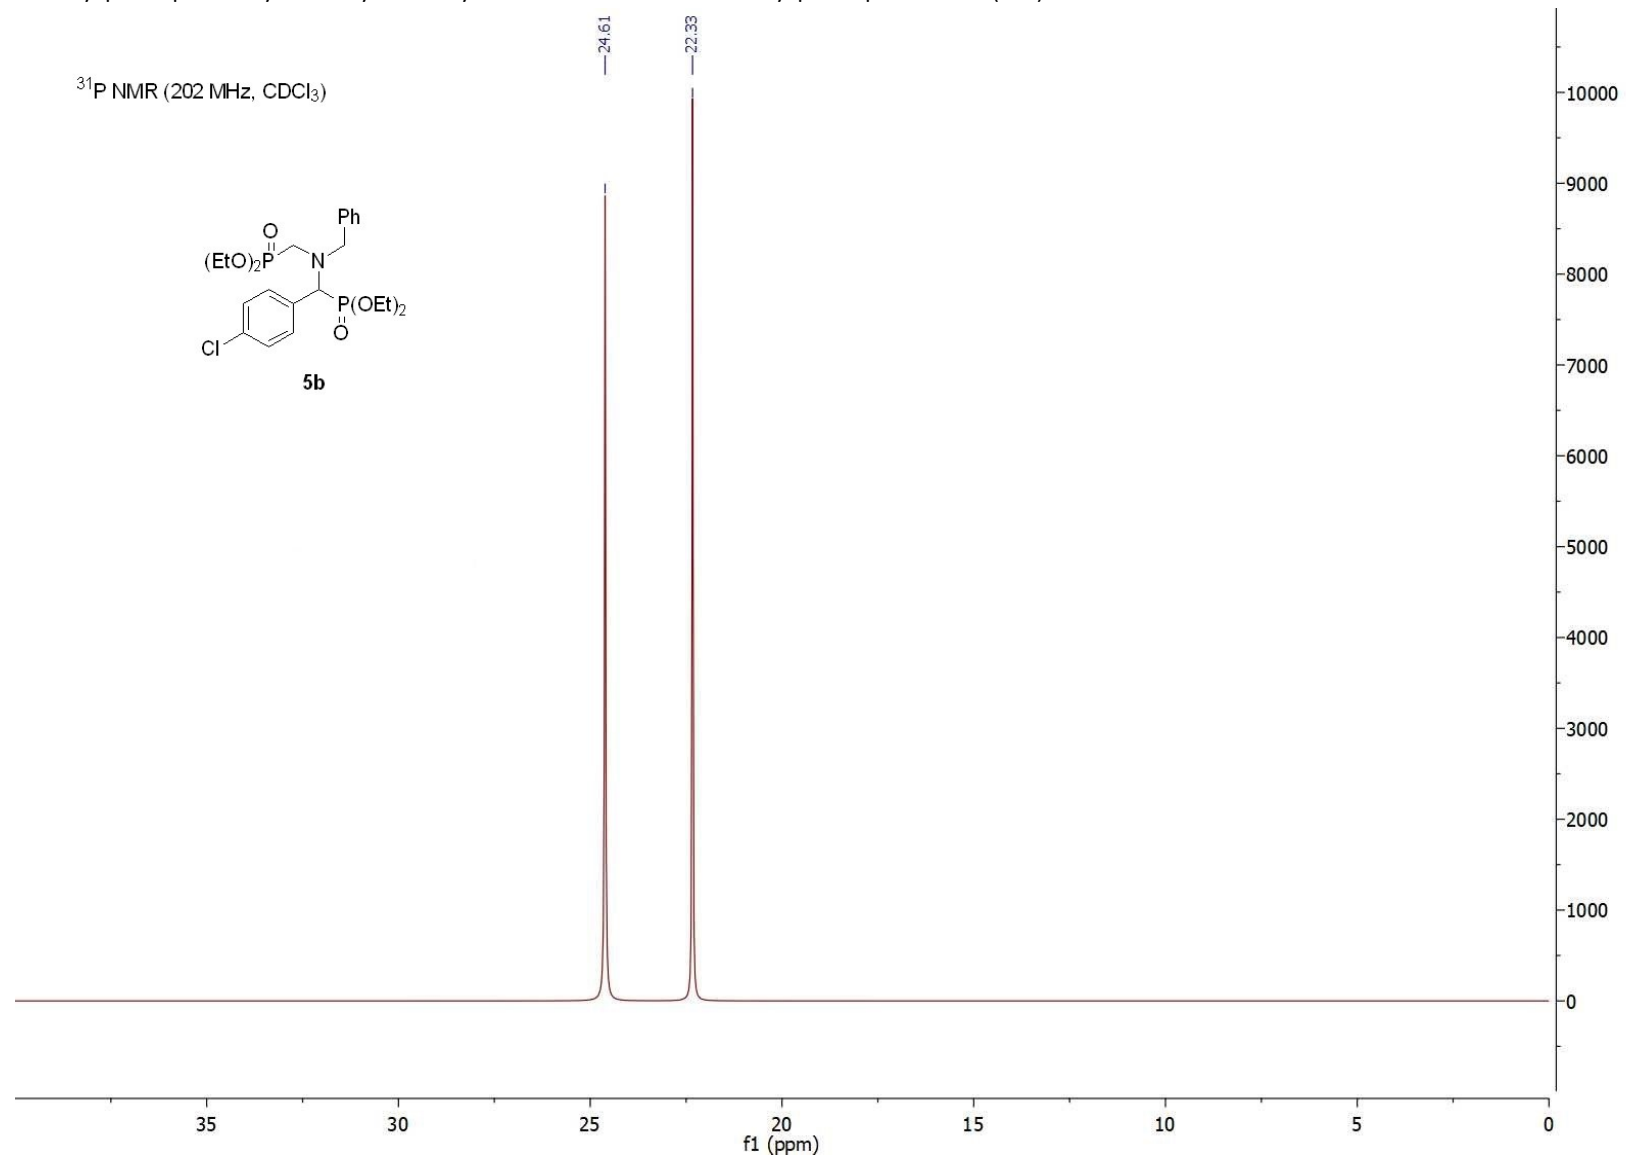



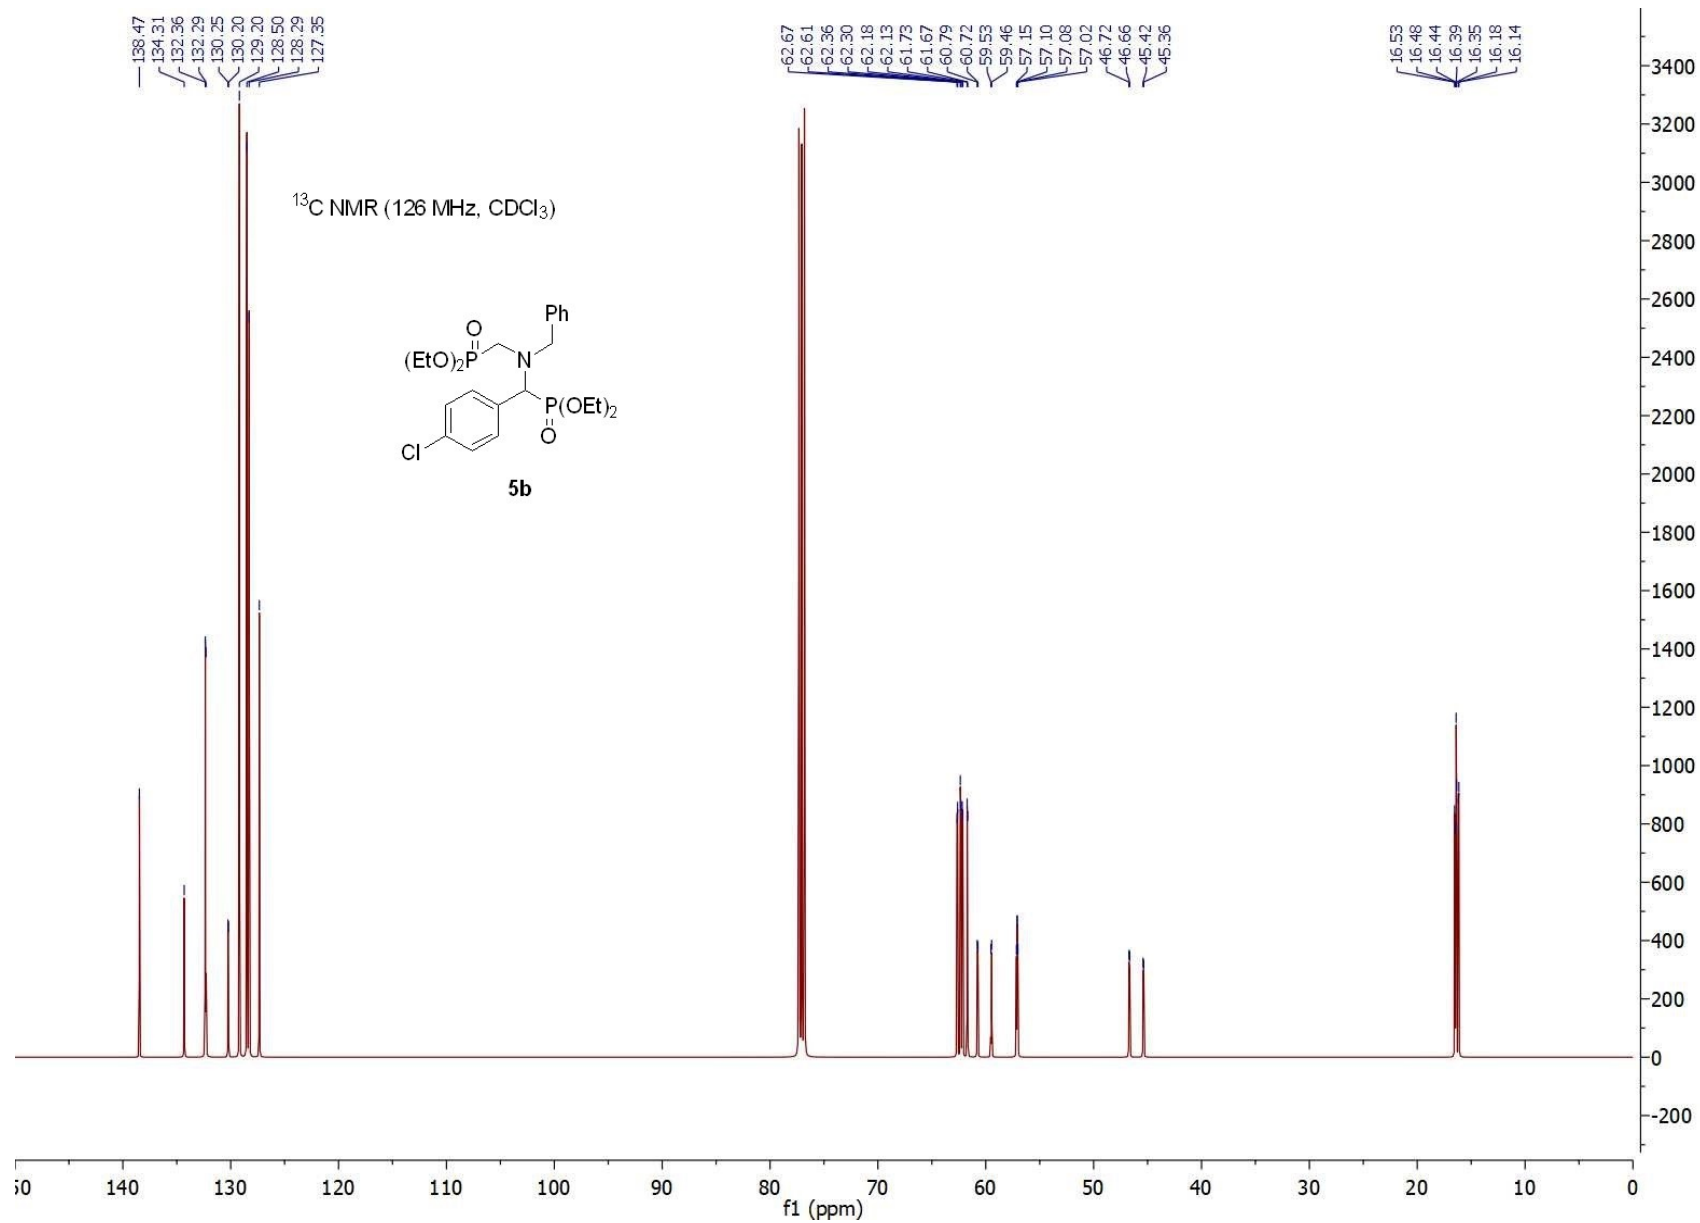

$^1\text{H}$  NMR (500 MHz,  $\text{CDCl}_3$ )

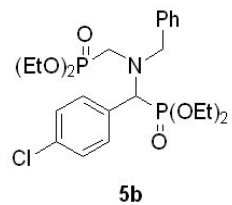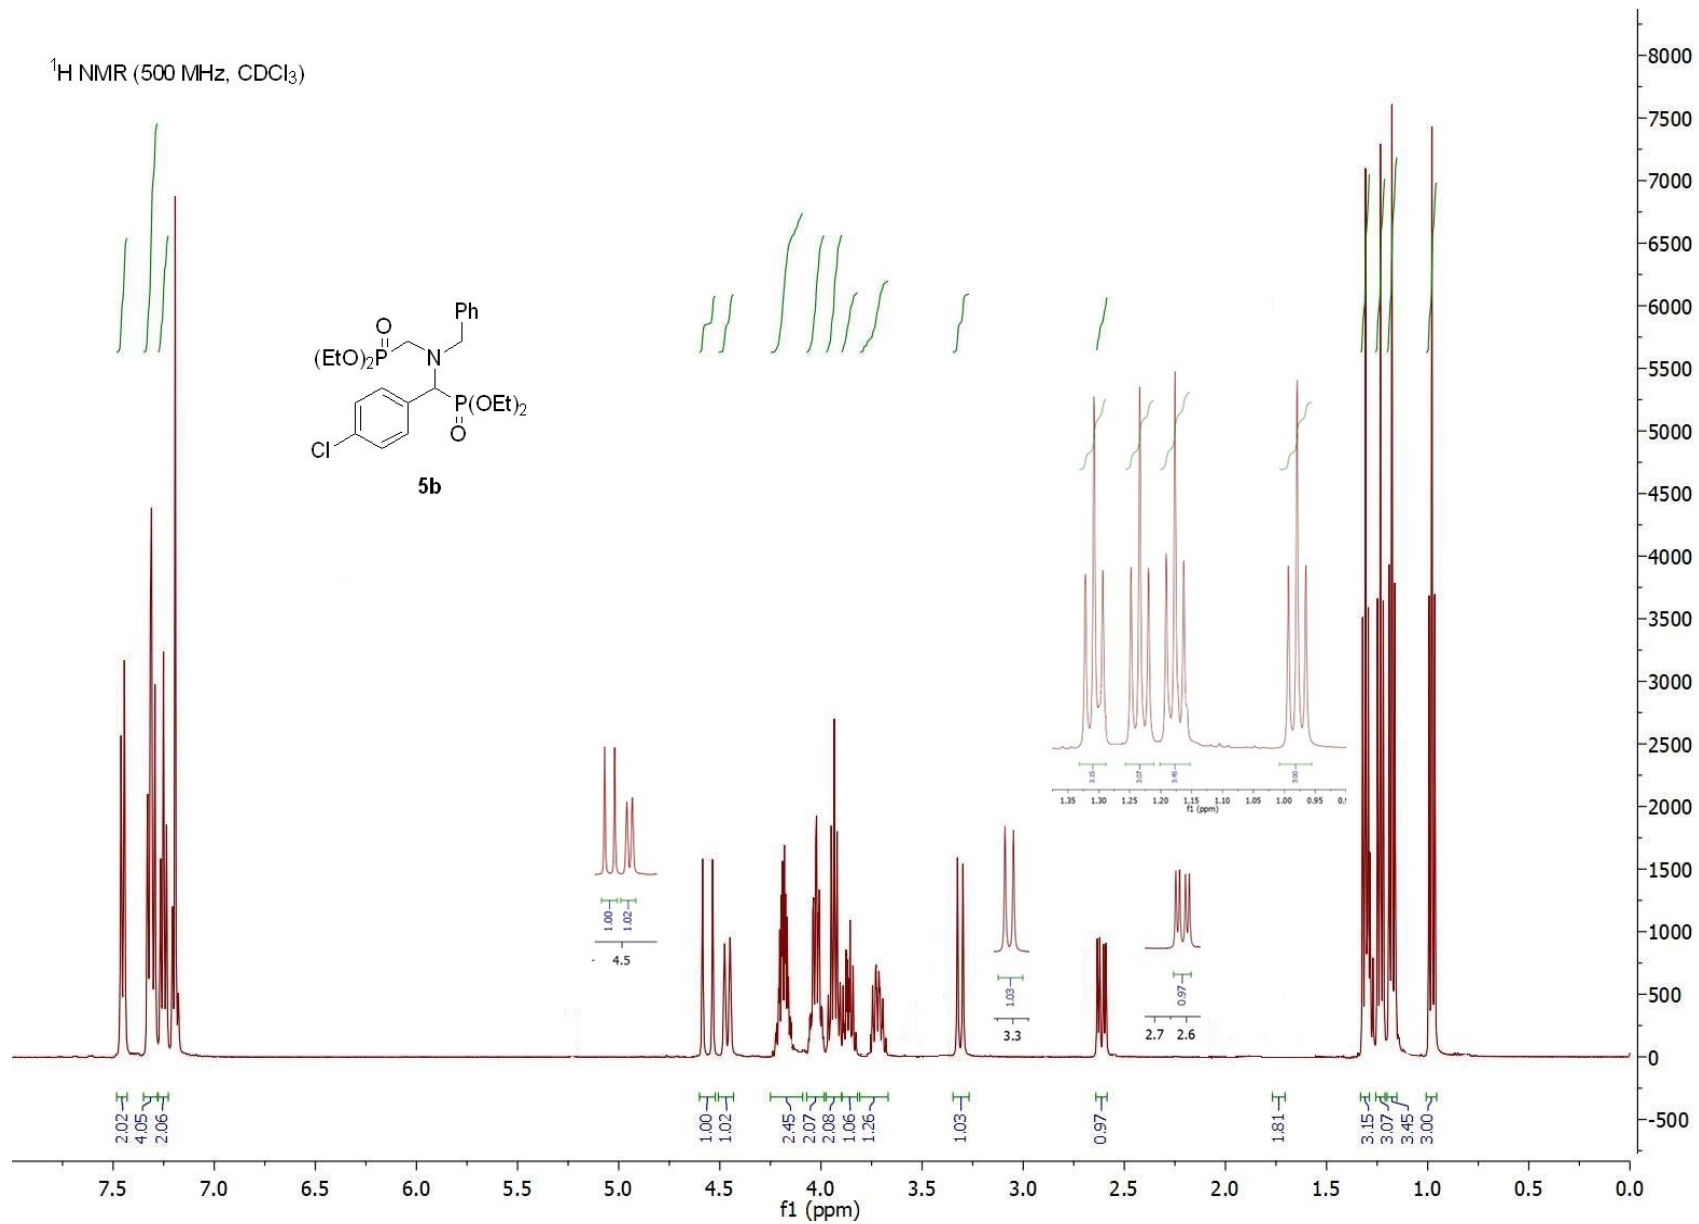

Diethyl diethylphosphonoylmethyl-benzyl-amino-4-methylbenzylphosphonate (**5c**)

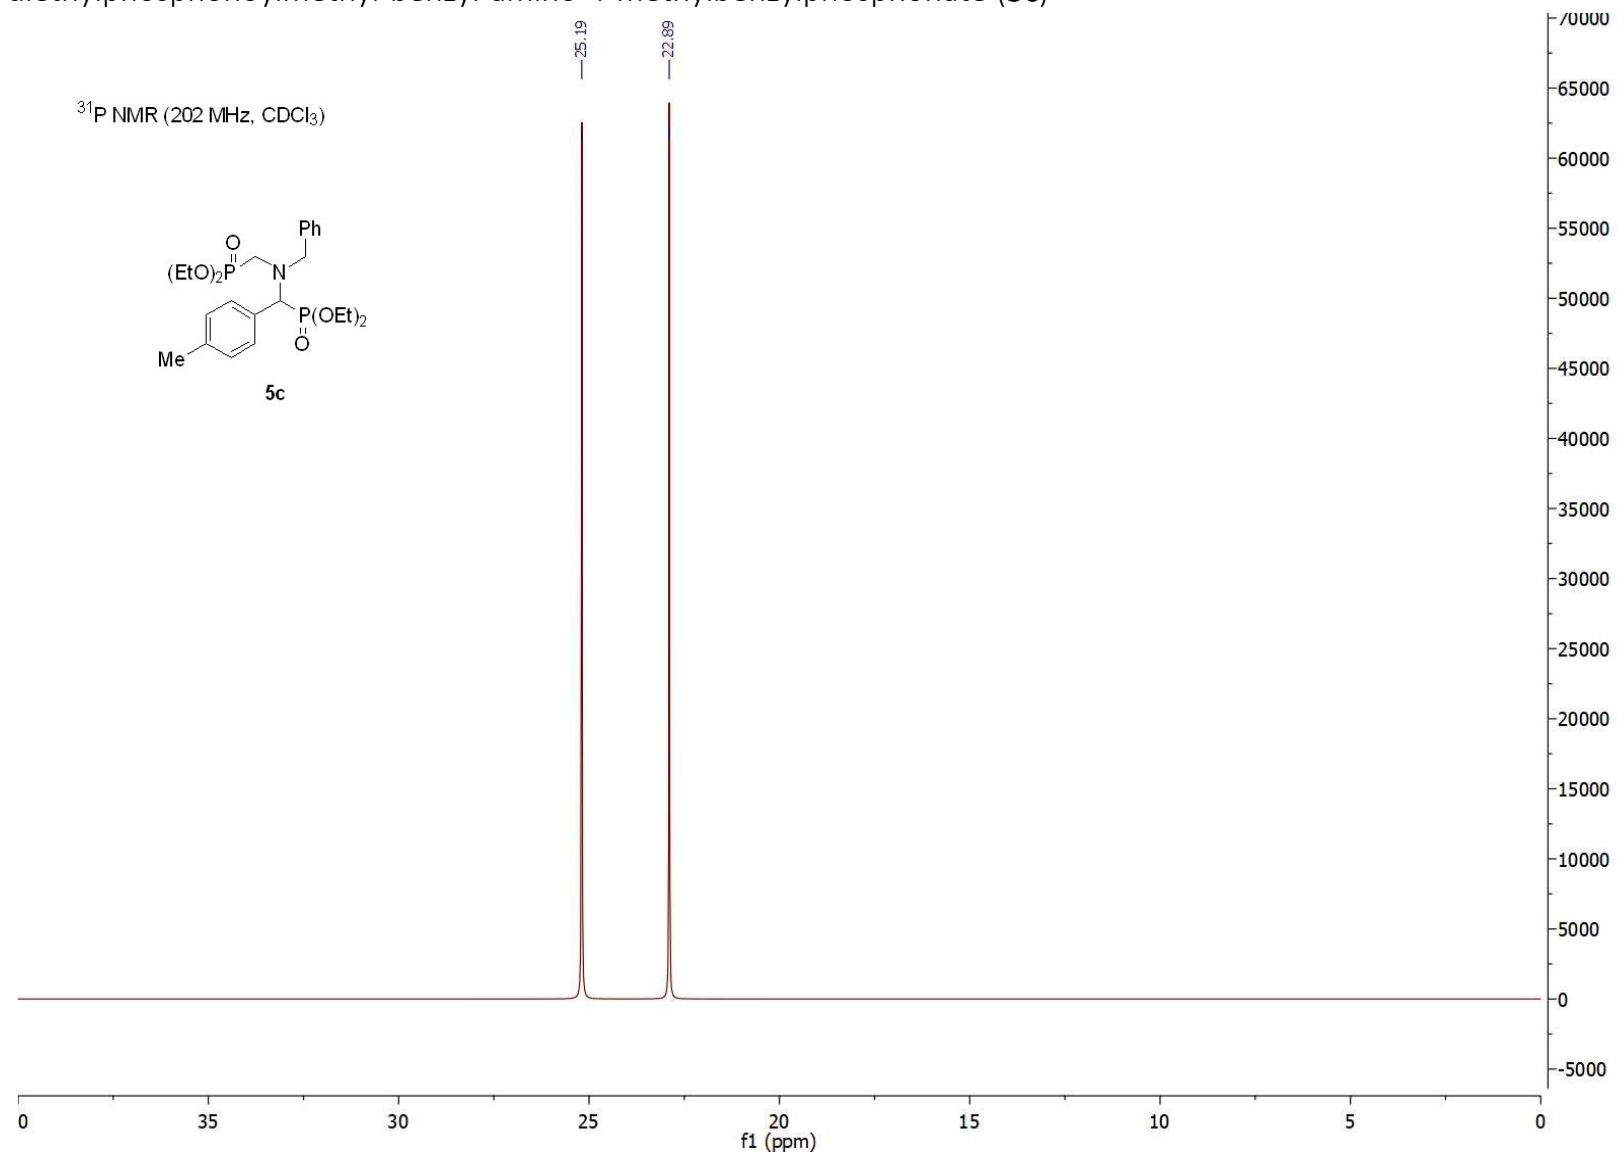

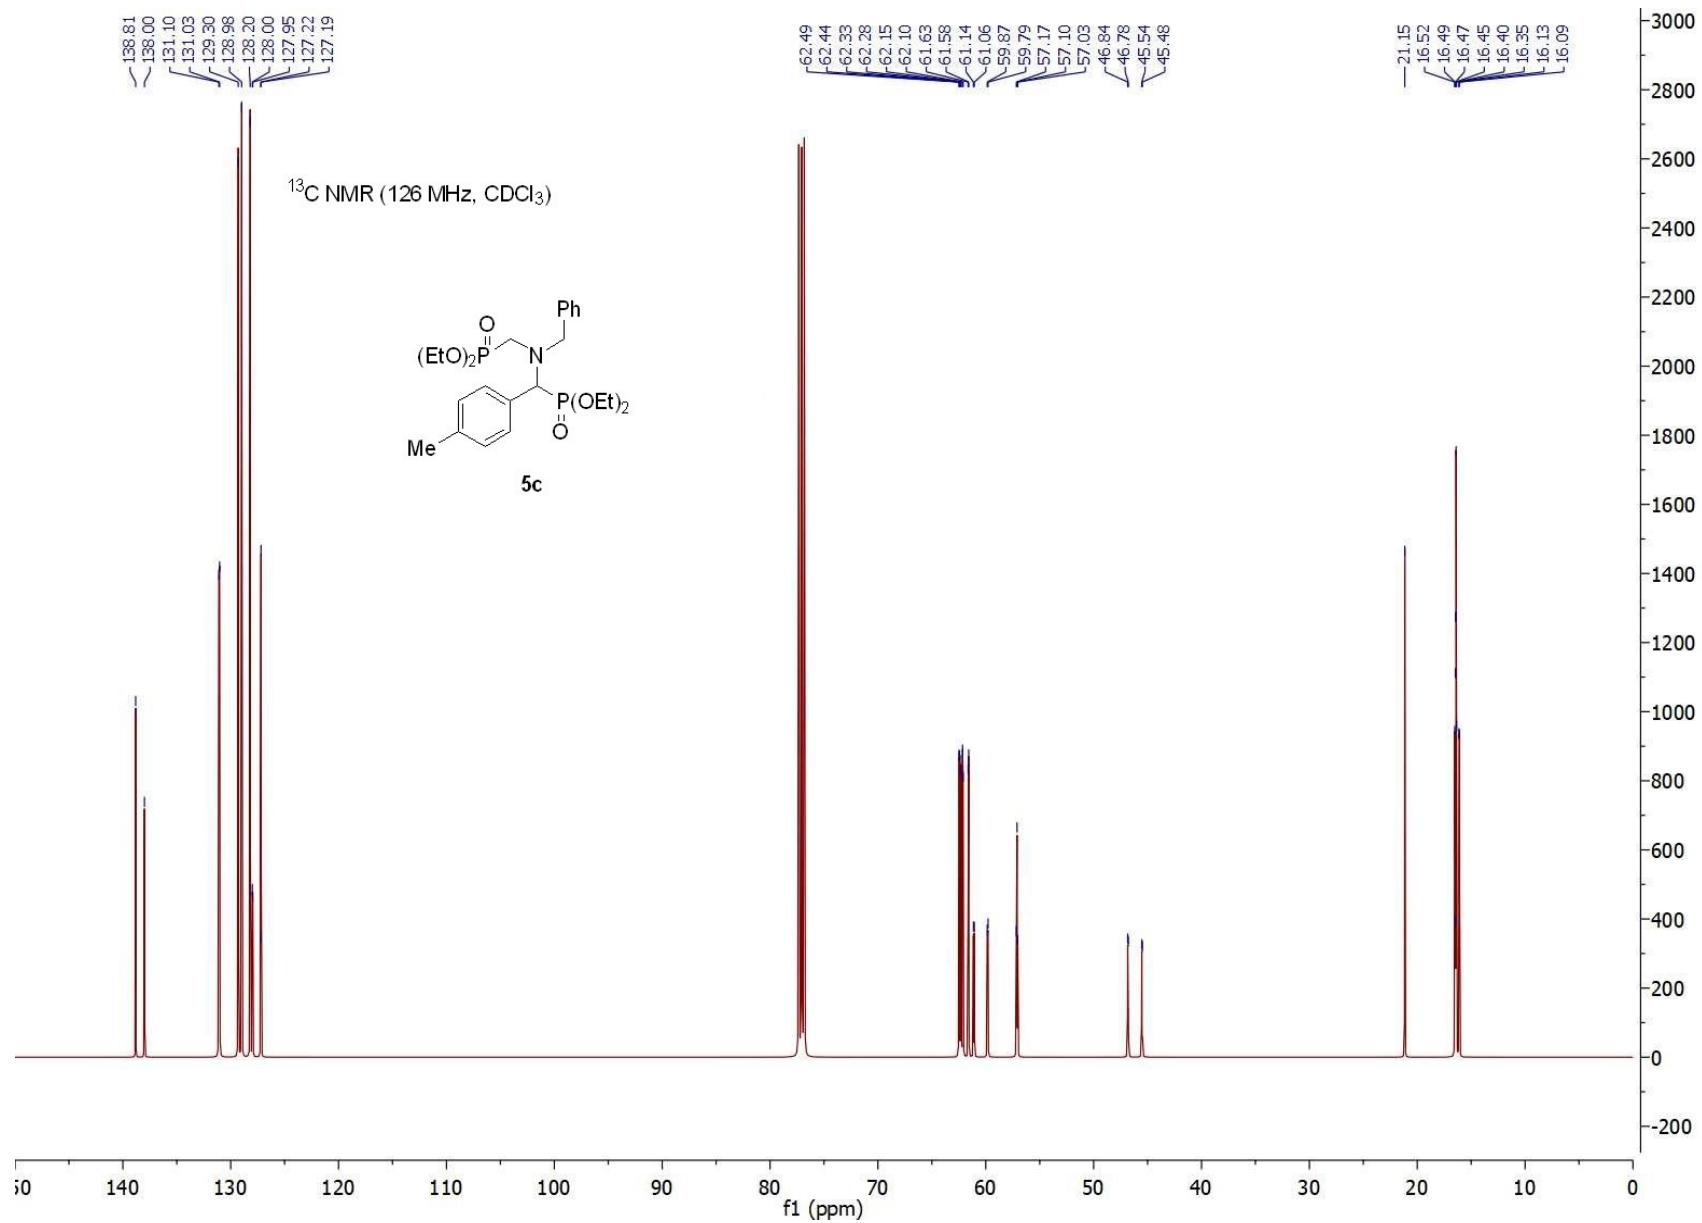

$^1\text{H}$  NMR (500 MHz,  $\text{CDCl}_3$ )

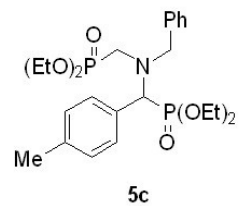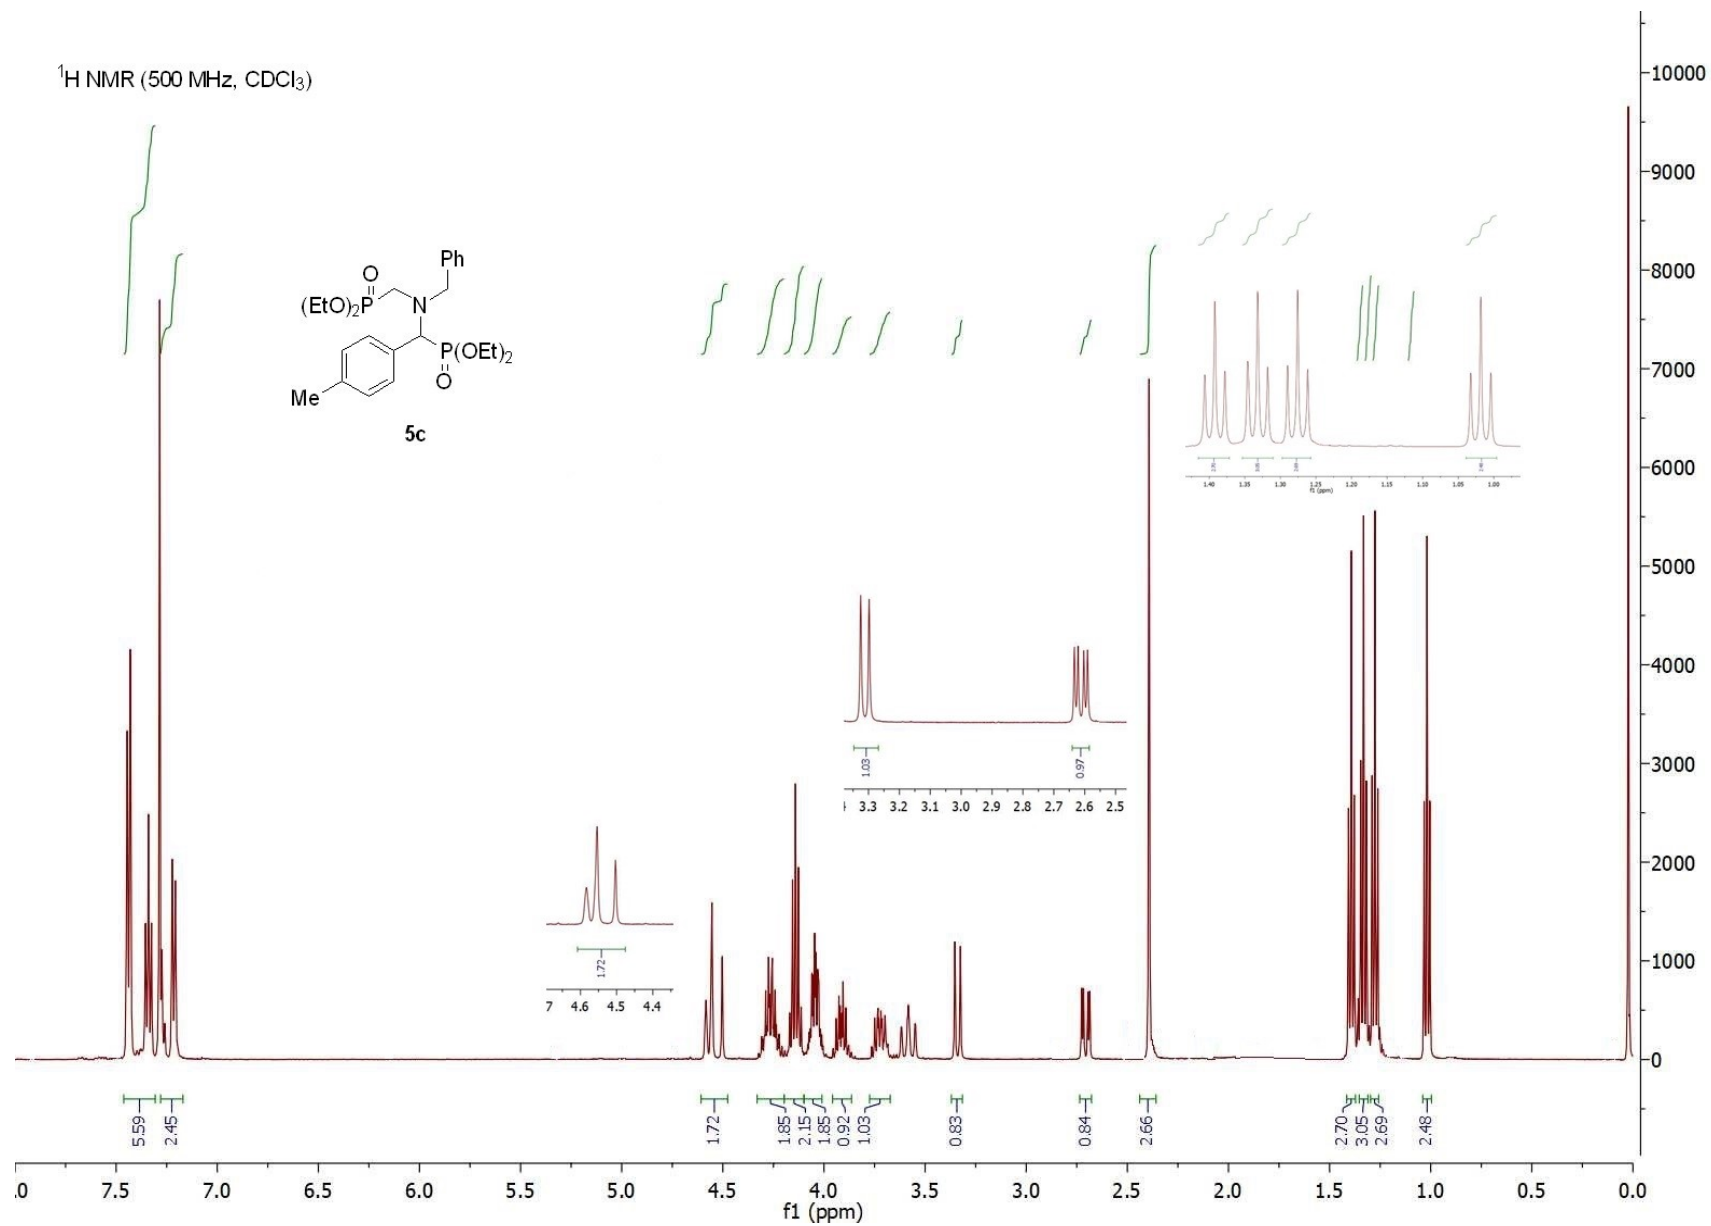

Diethyl diphenylphosphinoylmethyl-benzyl-amino-benzylphosphonate (**5d**)

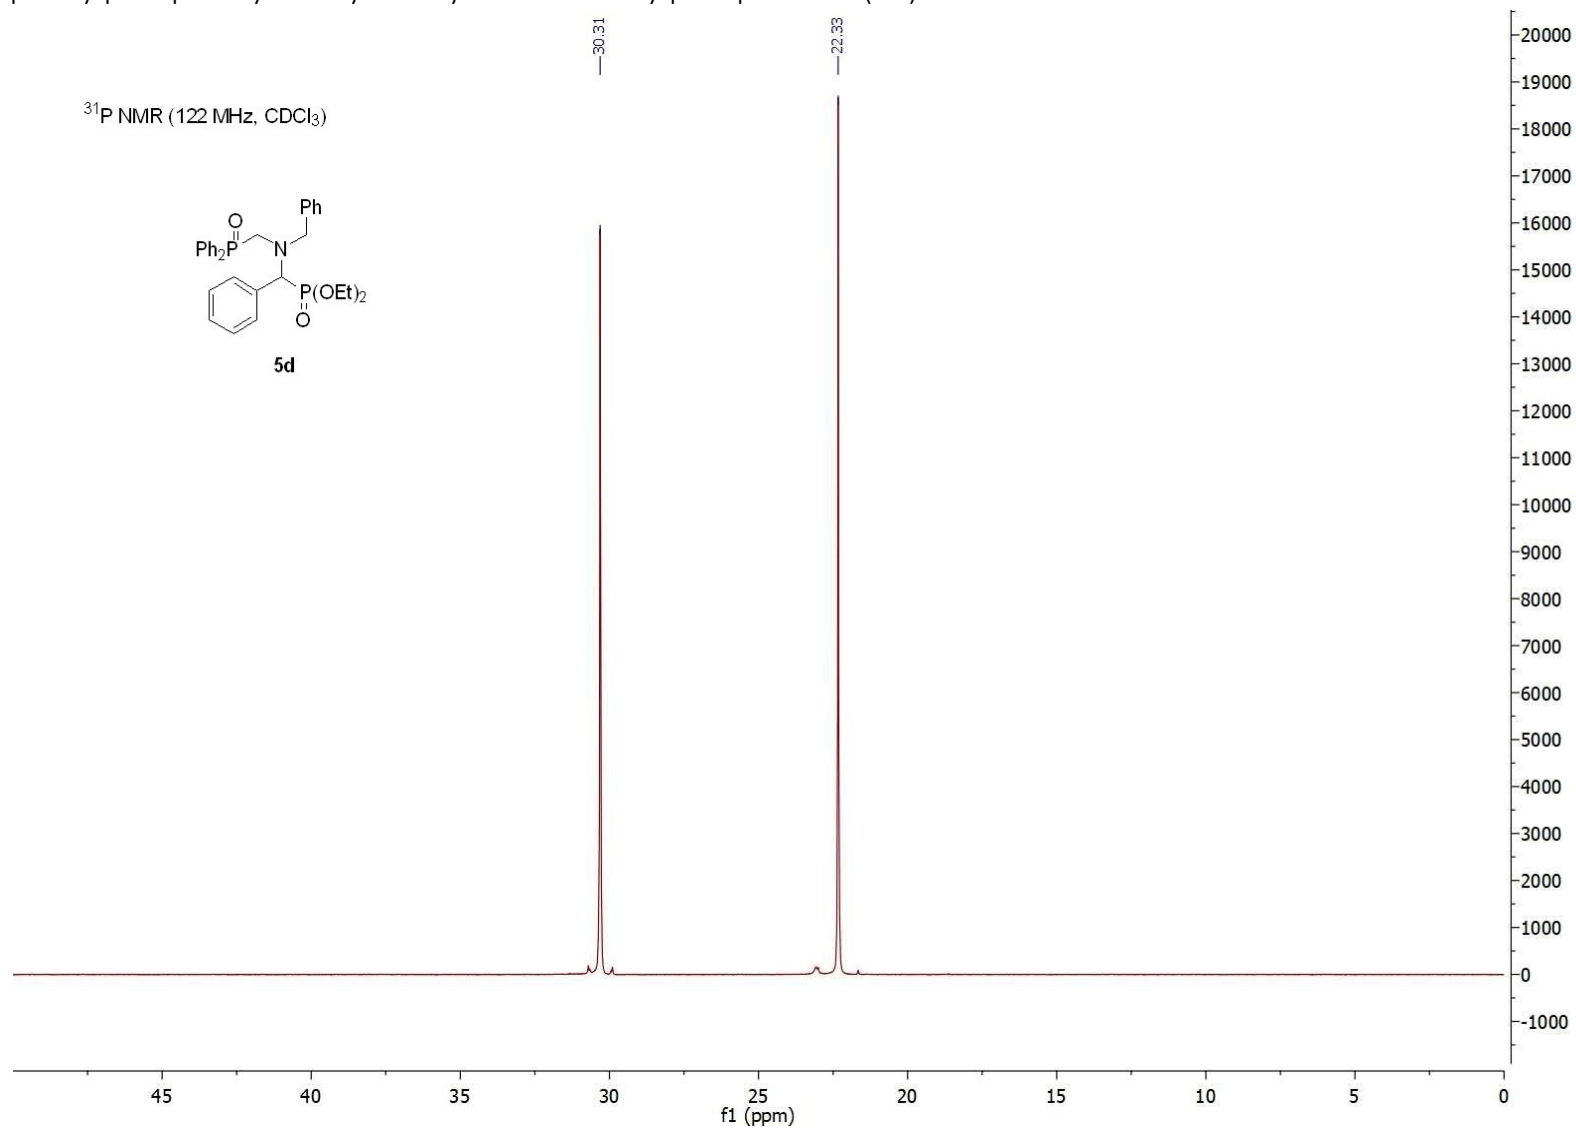

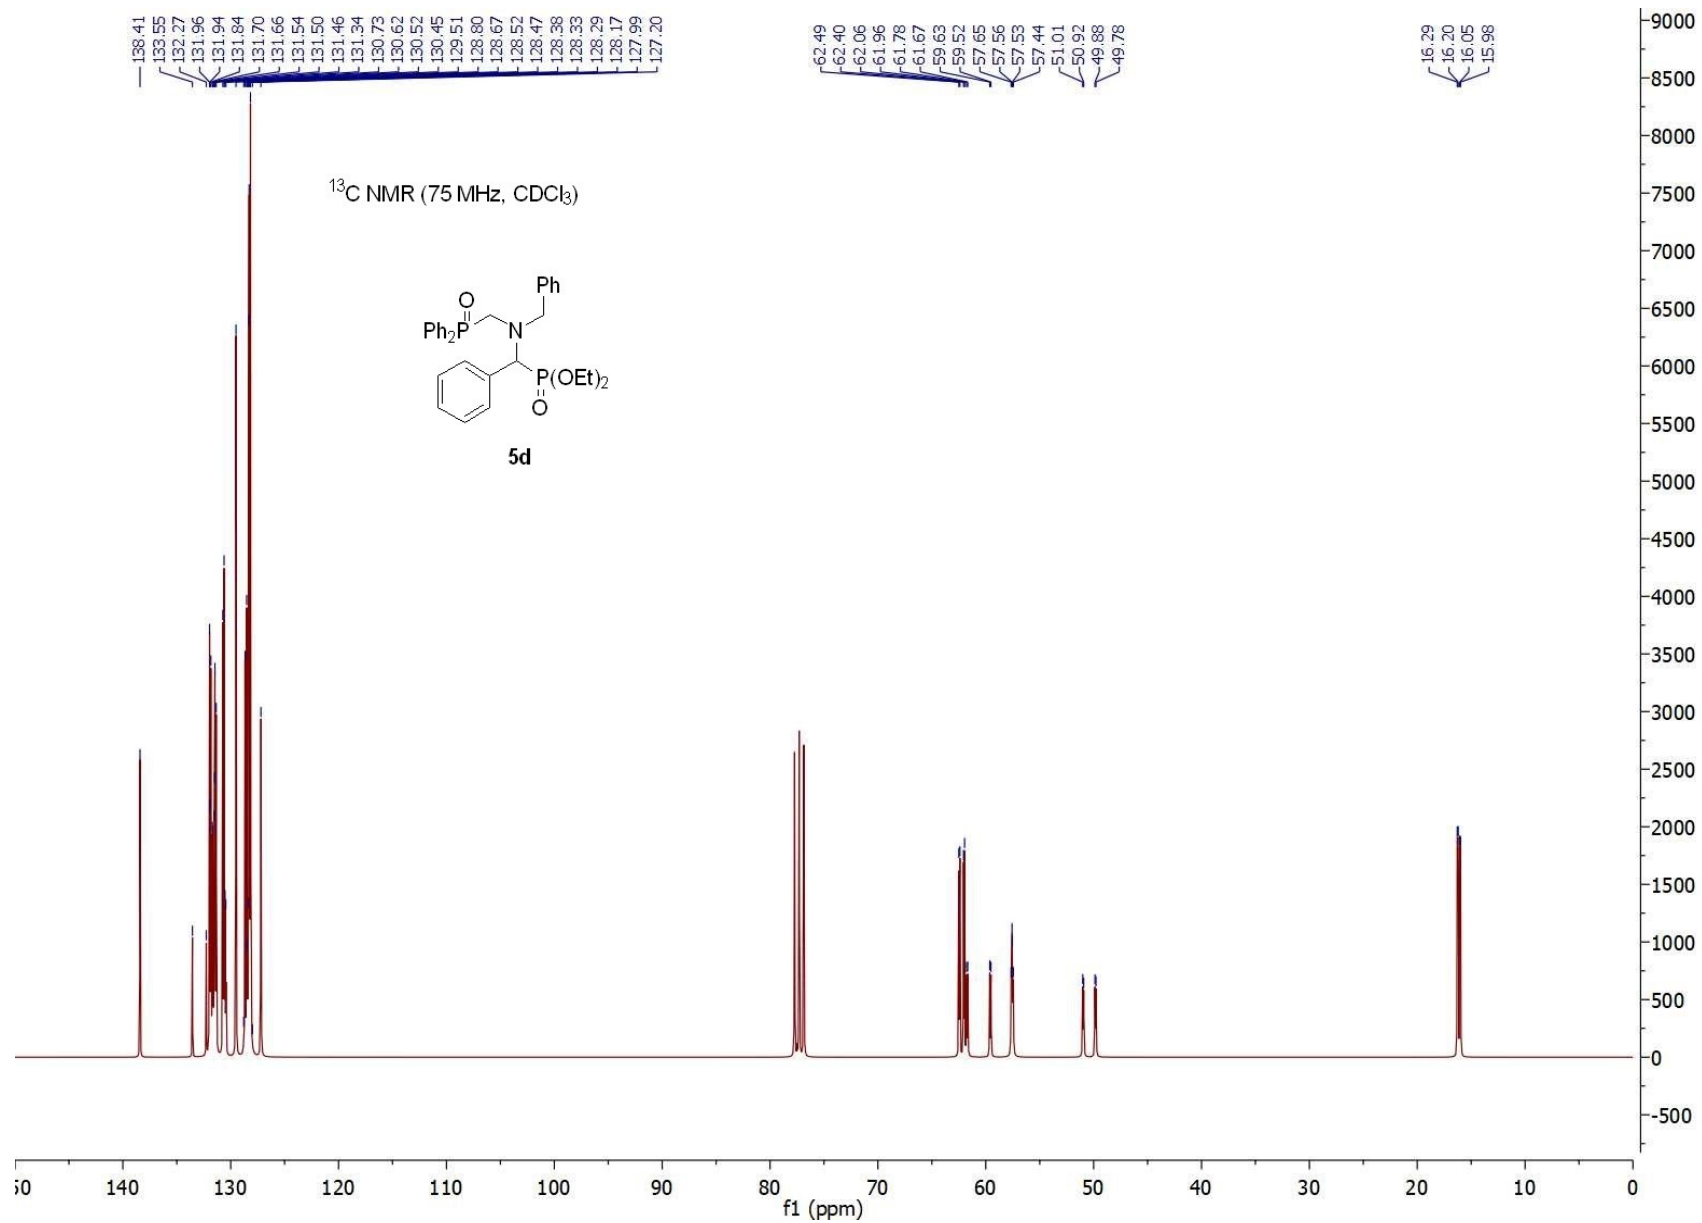

$^1\text{H}$  NMR (500 MHz,  $\text{CDCl}_3$ )

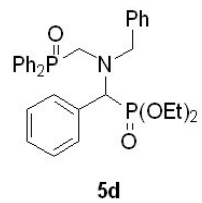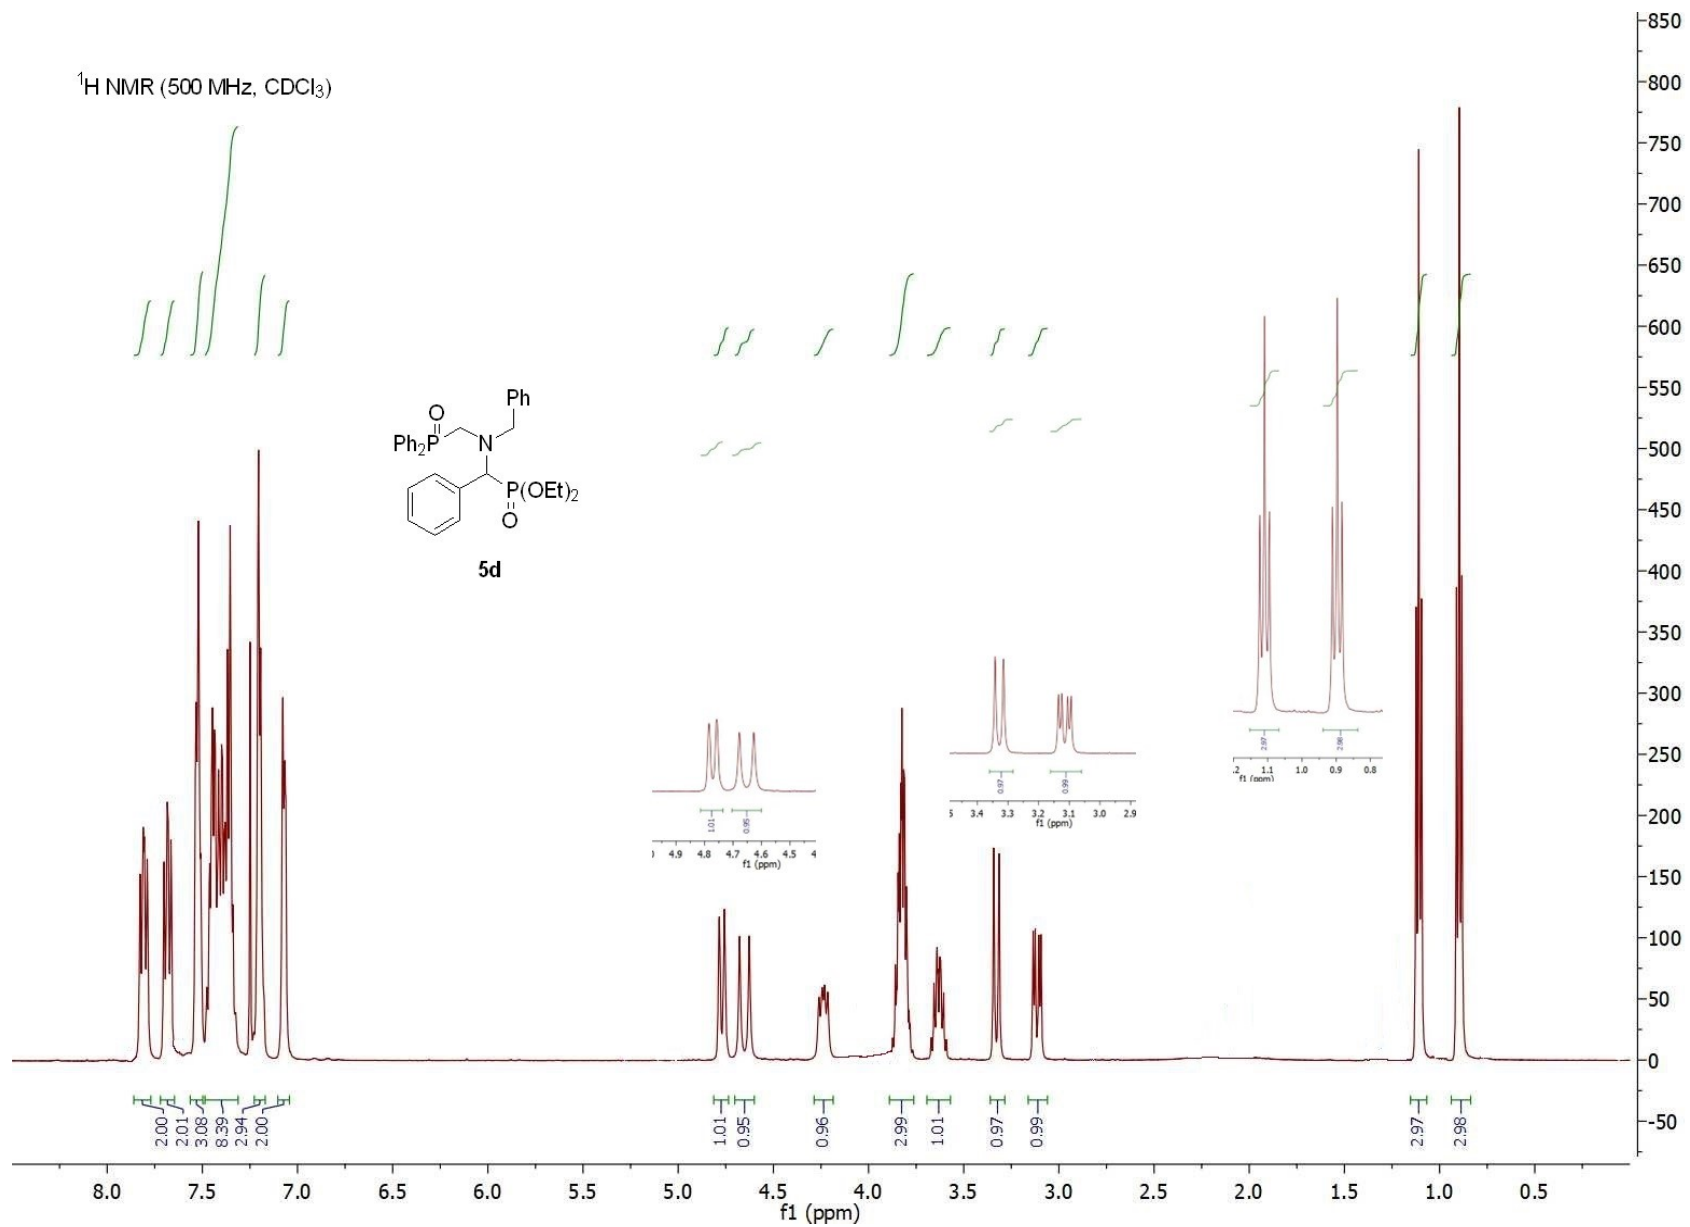



Diethyl bis(4-methylphenyl)phosphinoylmethyl-benzyl-amino-benzylphosphonate (**5e**)

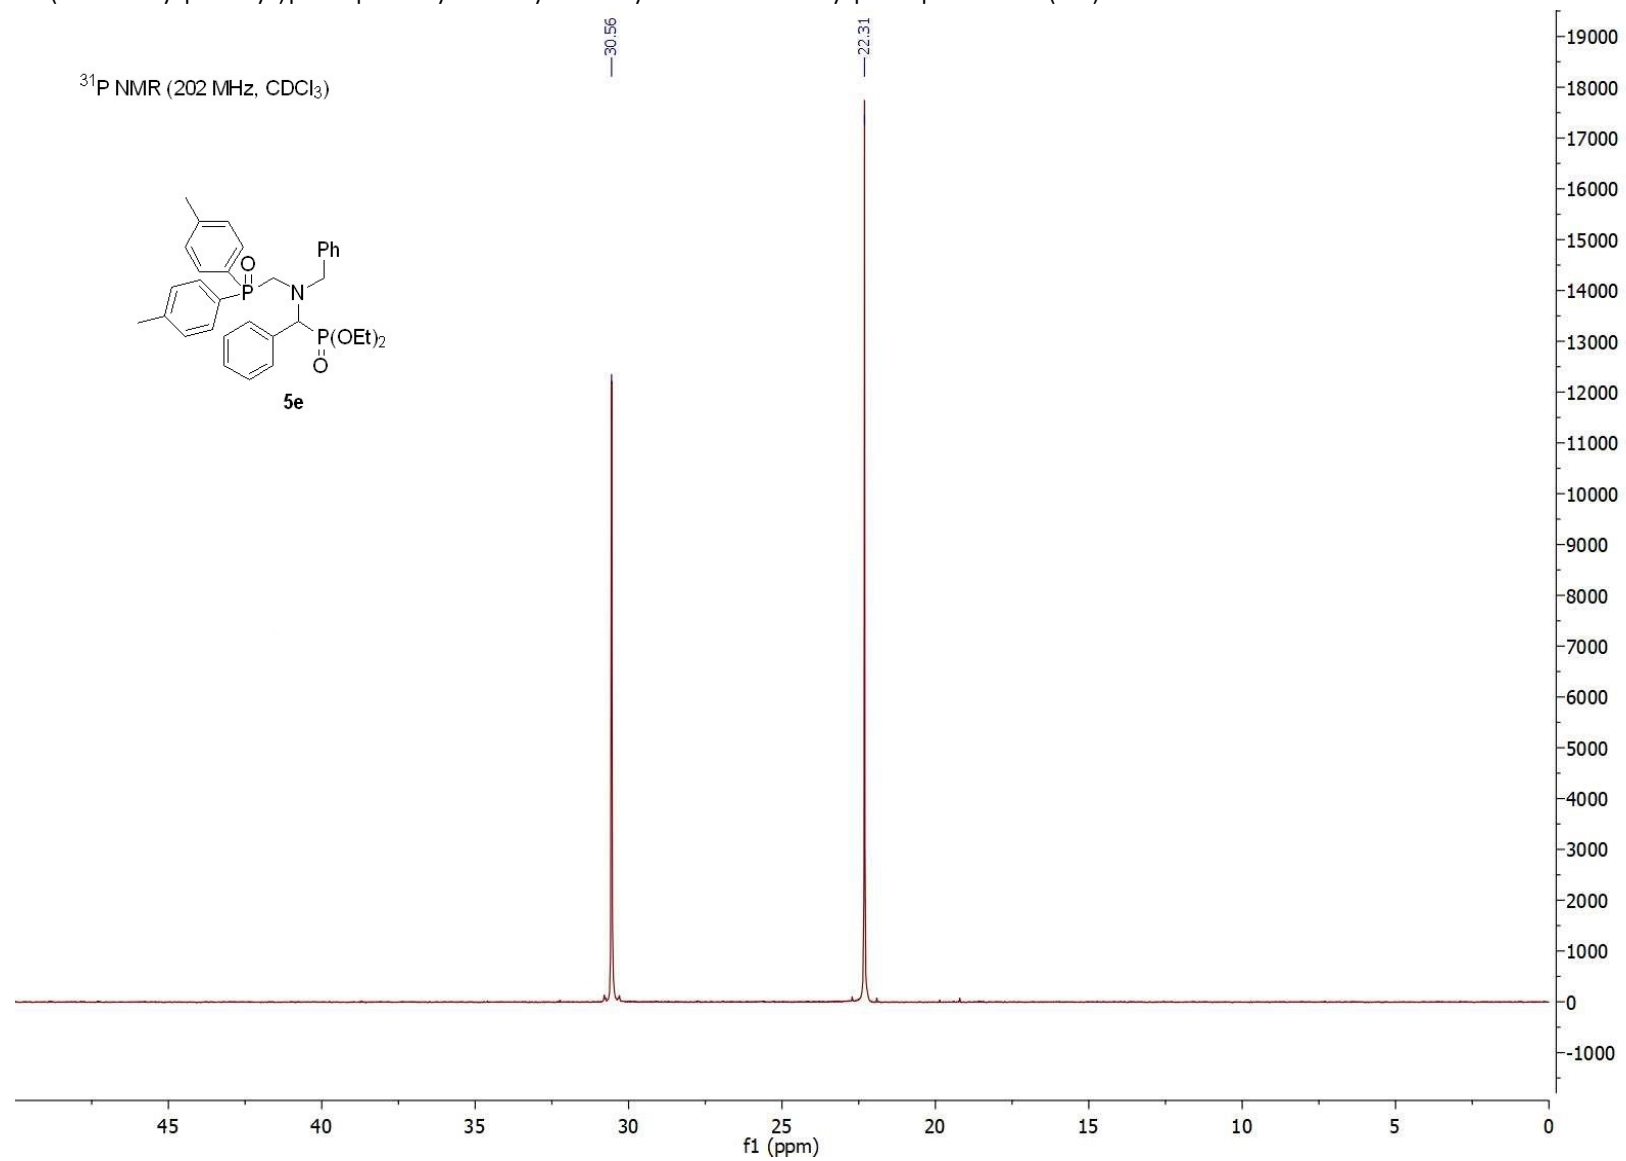

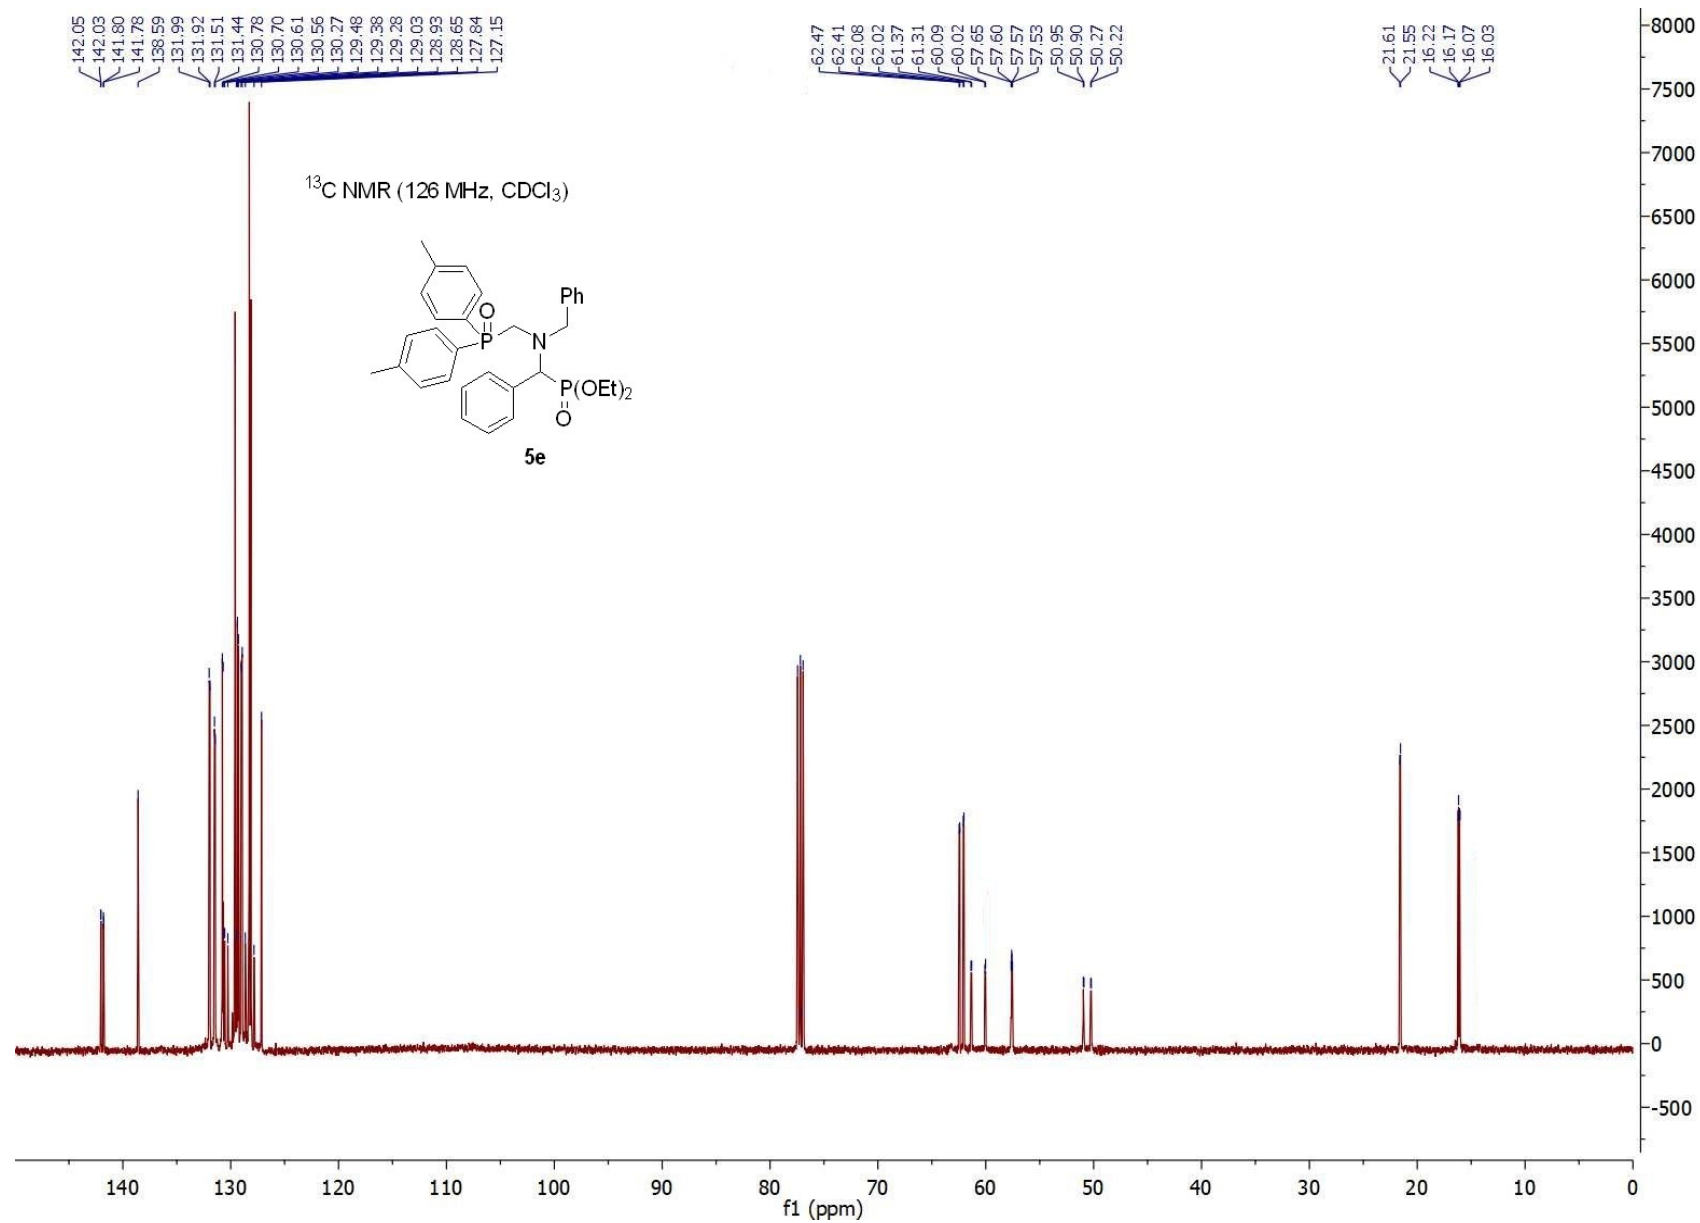

$^1\text{H}$  NMR (500 MHz,  $\text{CDCl}_3$ )

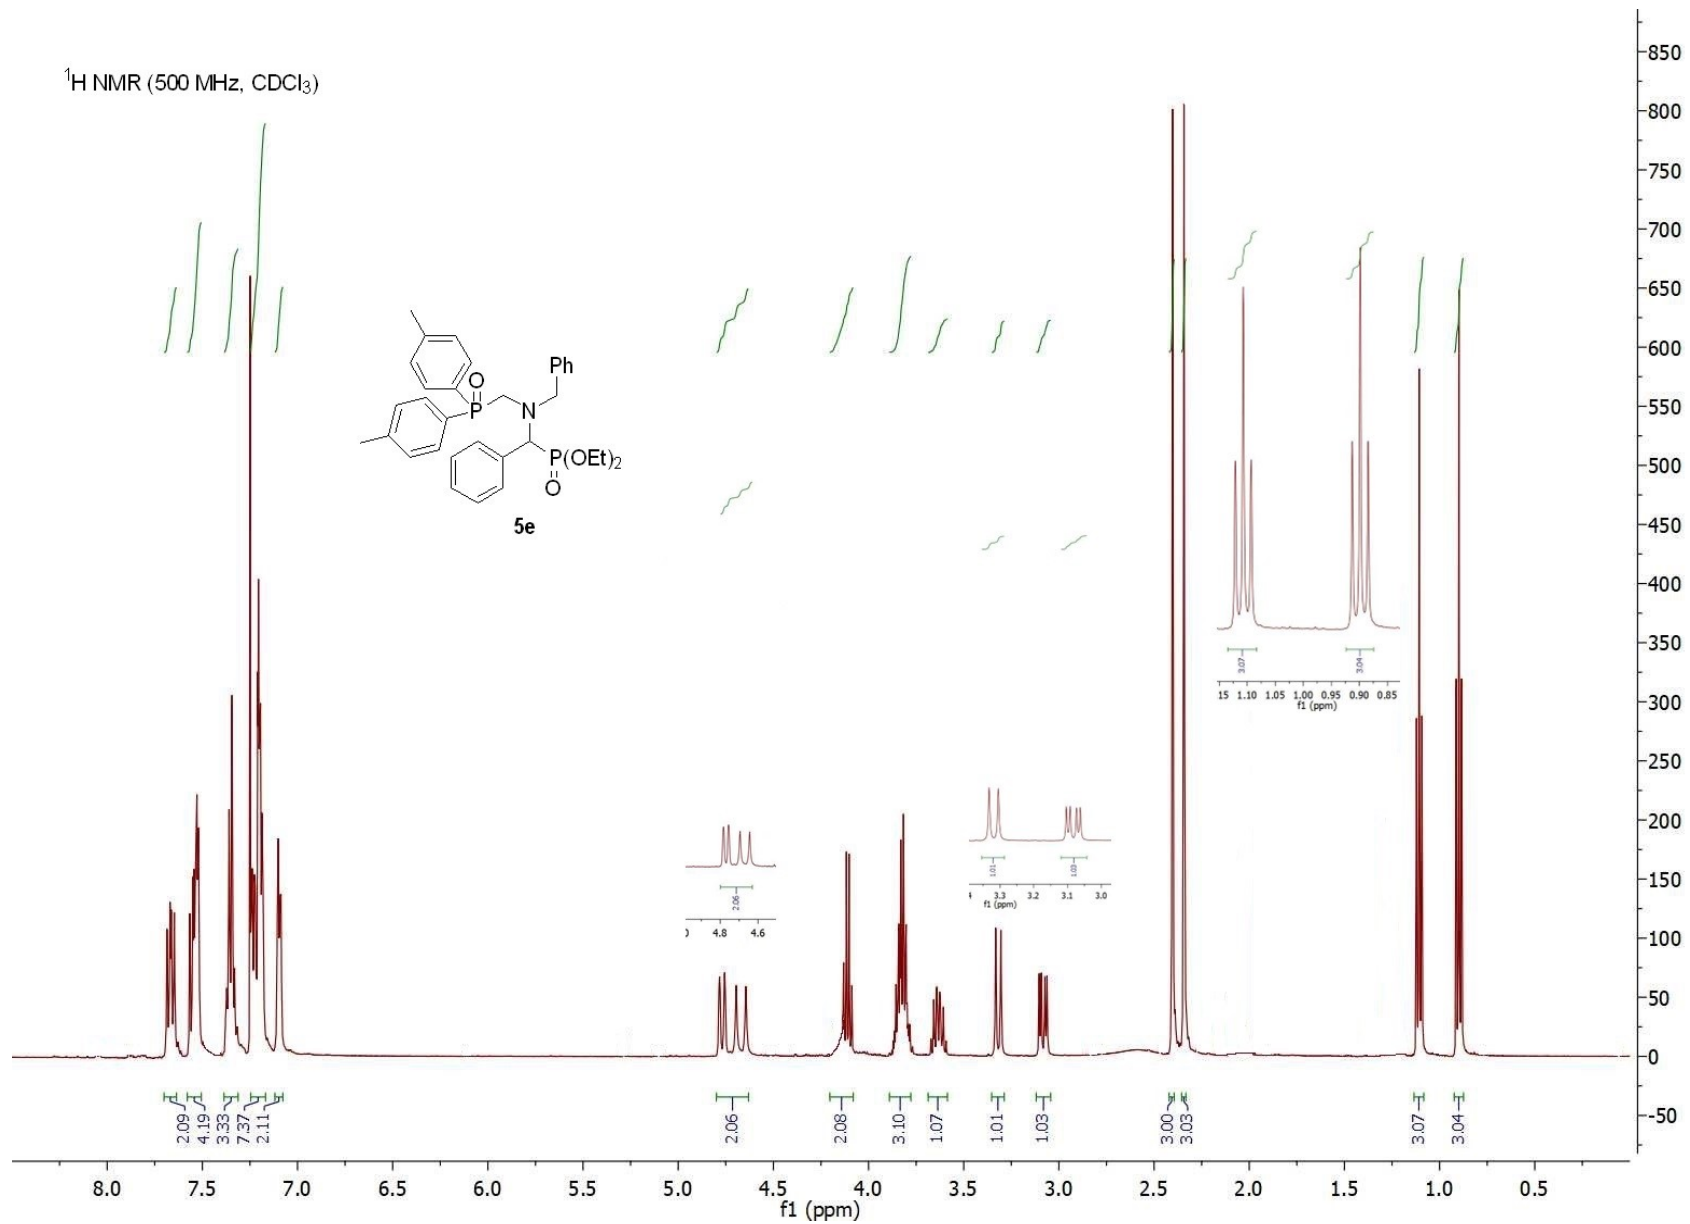

Diethyl bis(3,5-dimethylphenyl)phosphinoylmethyl-benzyl-amino-benzylphosphonate (5f)

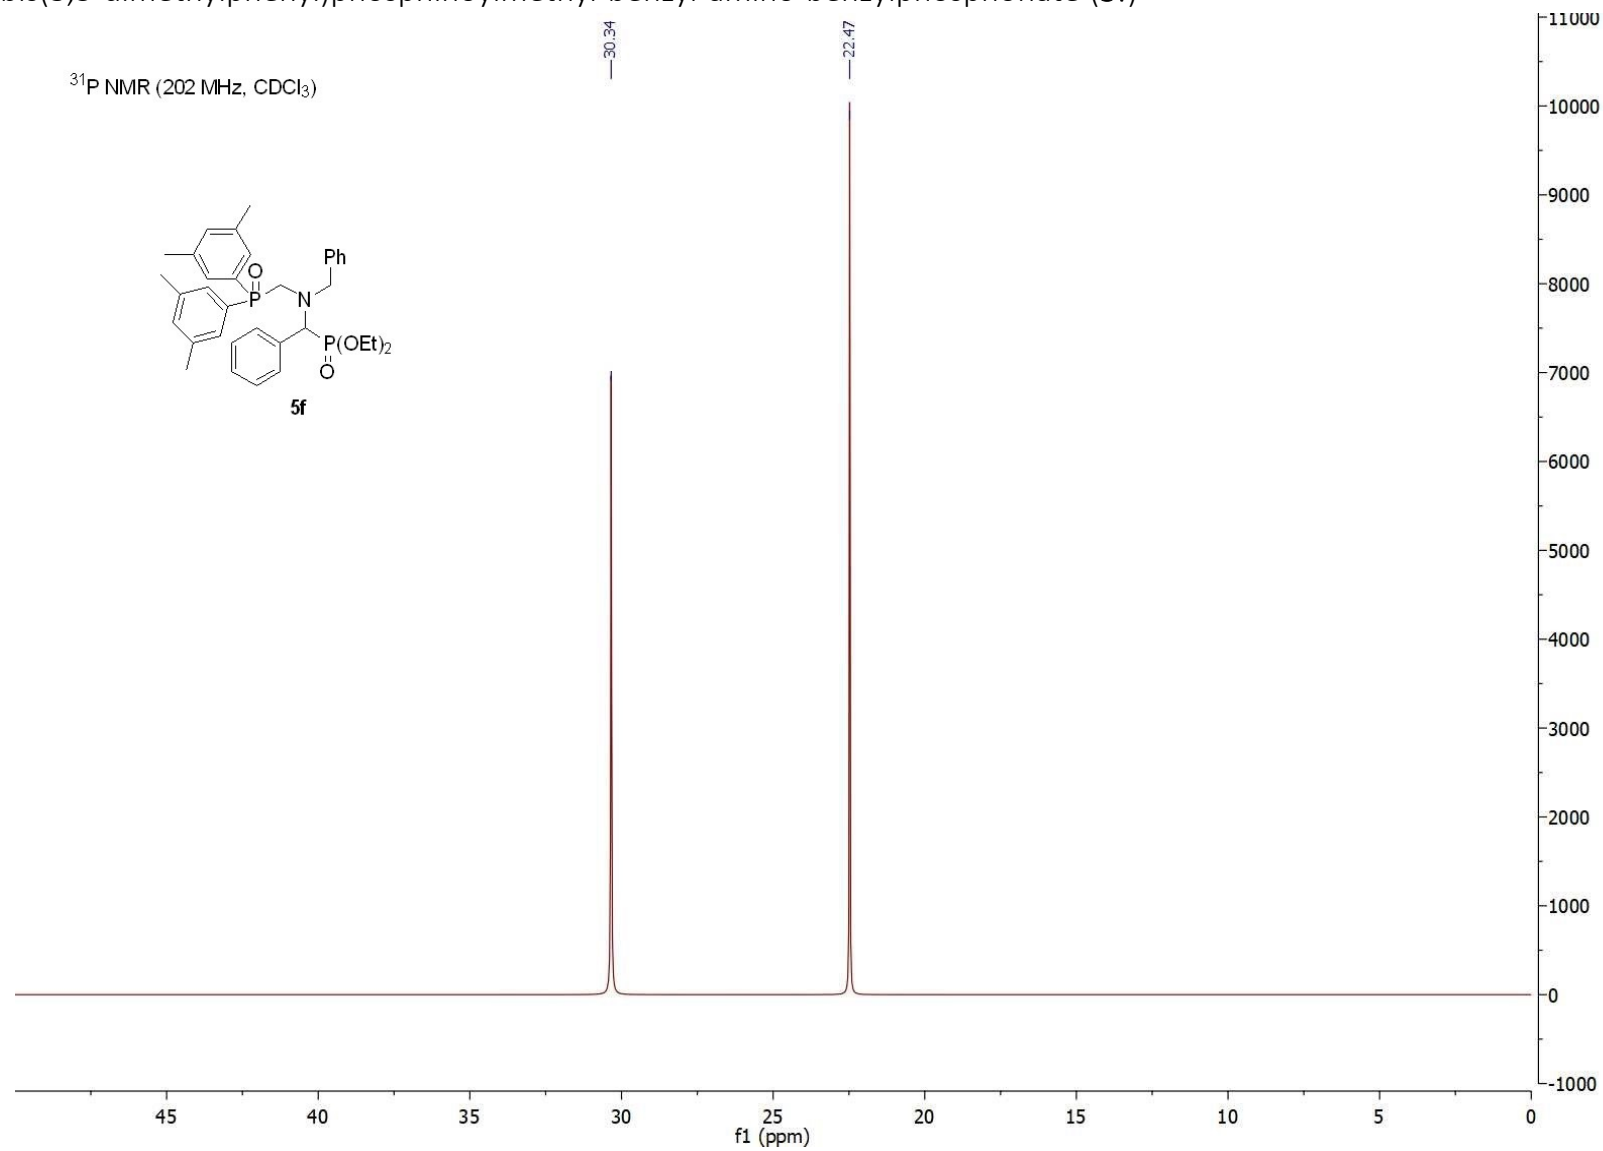

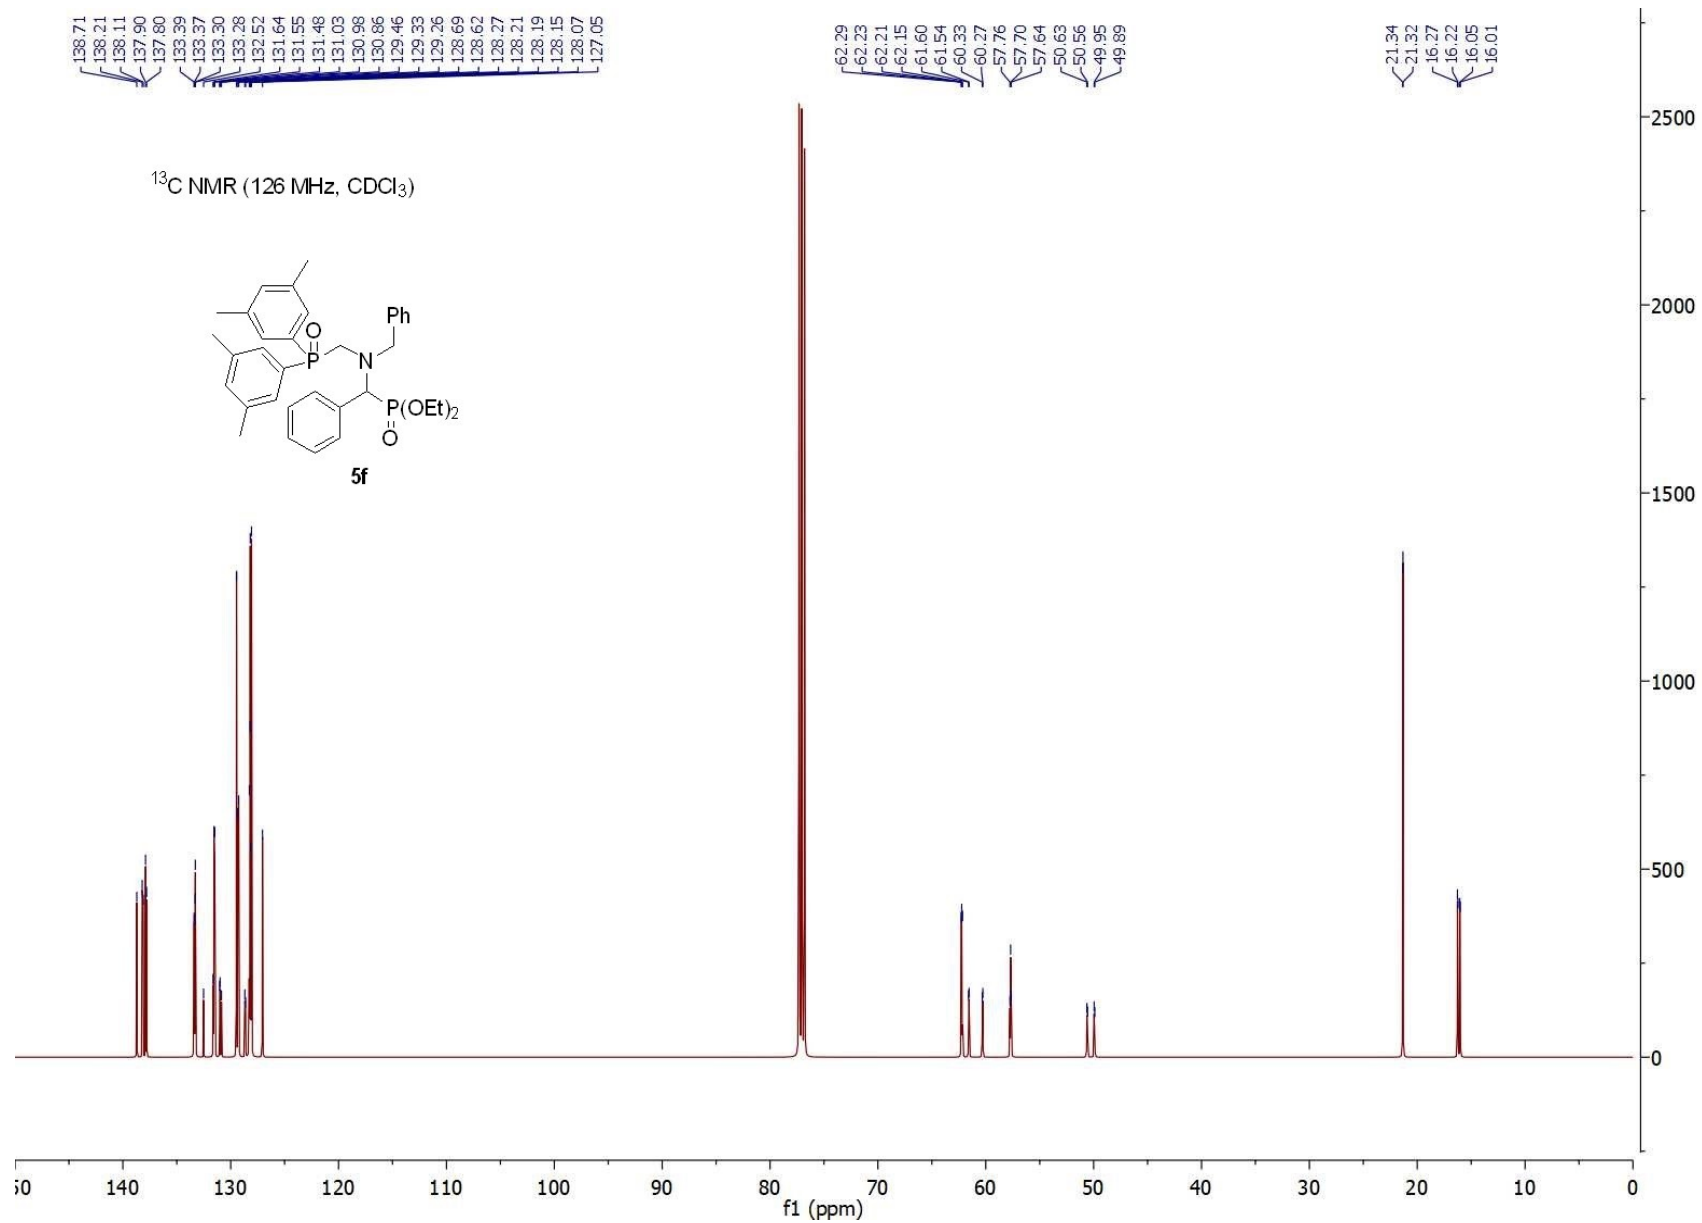

$^1\text{H}$  NMR (500 MHz,  $\text{CDCl}_3$ )

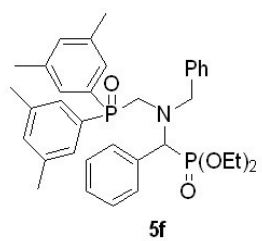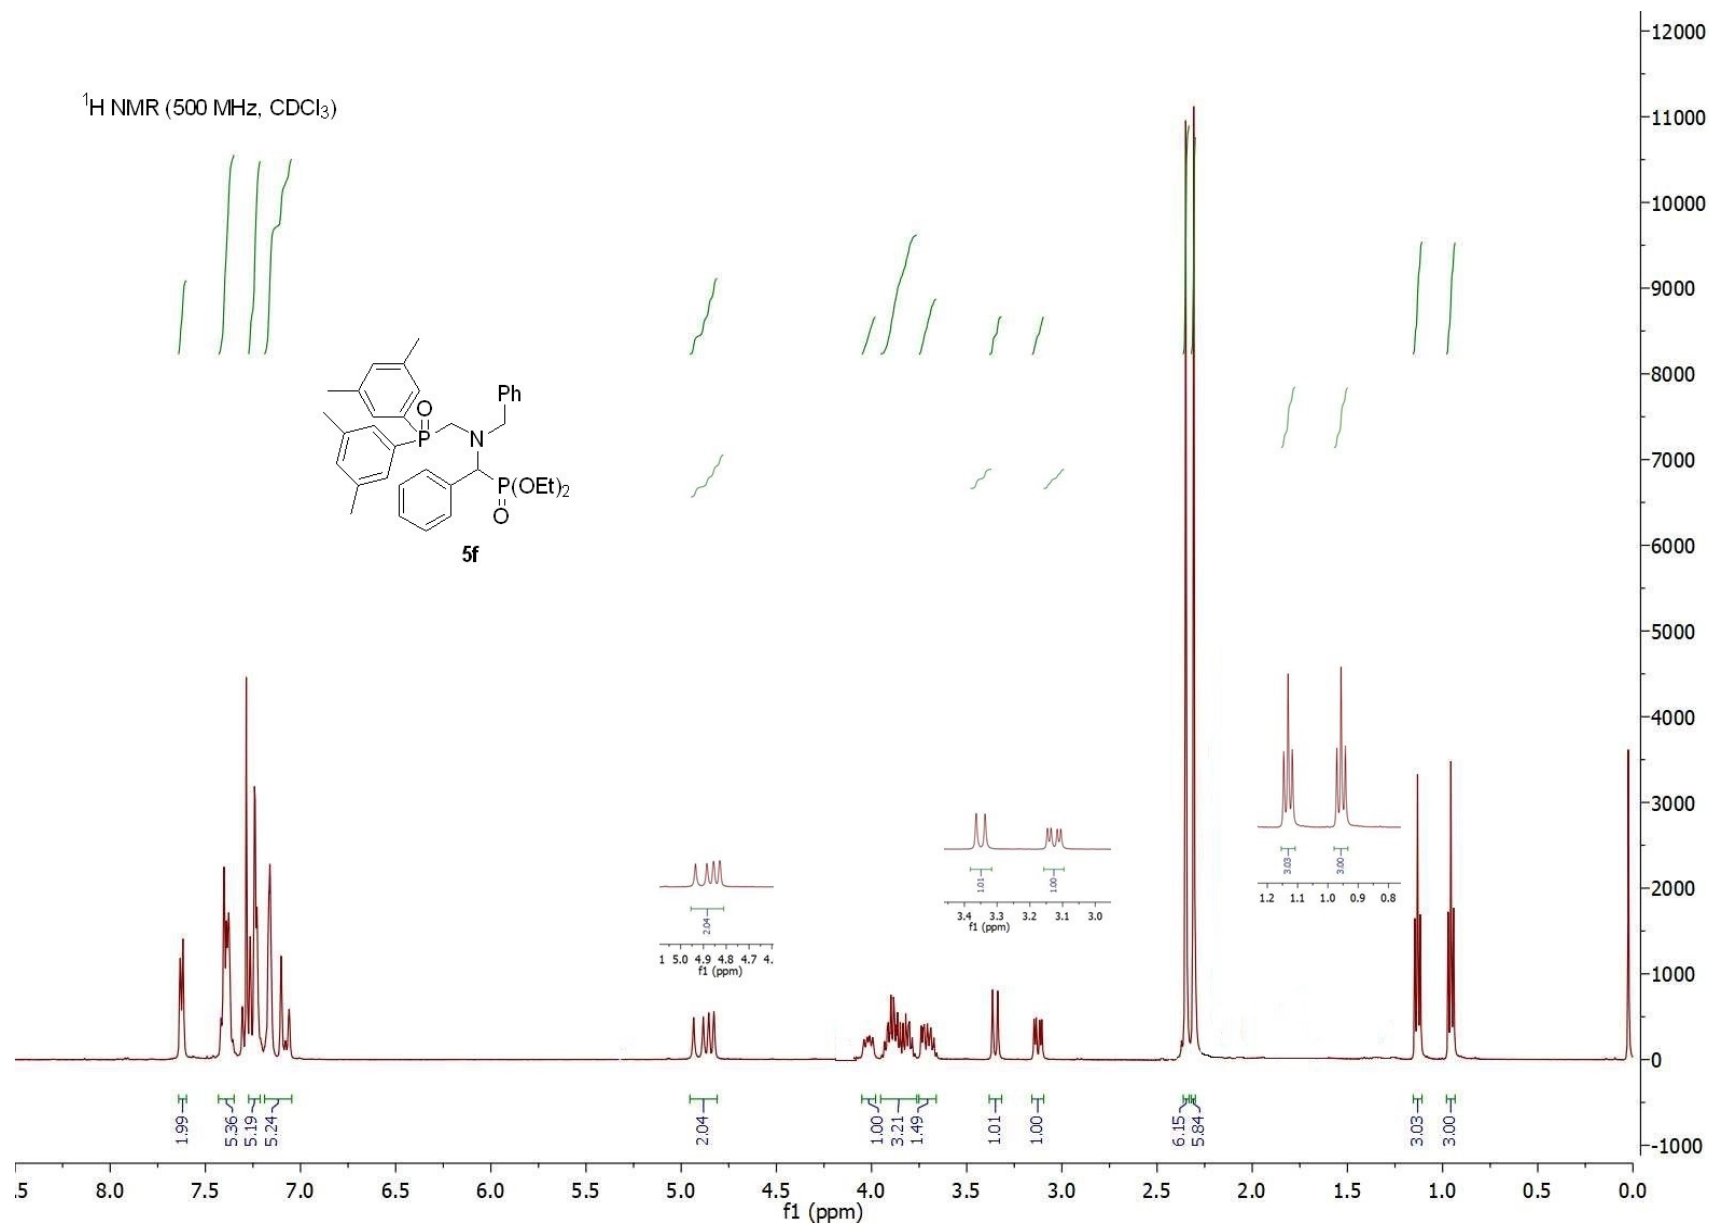

# Bis(diethylphosphonoyl-phenylmethyl)amine (6)

$^{31}\text{P}$  NMR (202 MHz,  $\text{CDCl}_3$ )

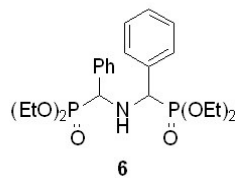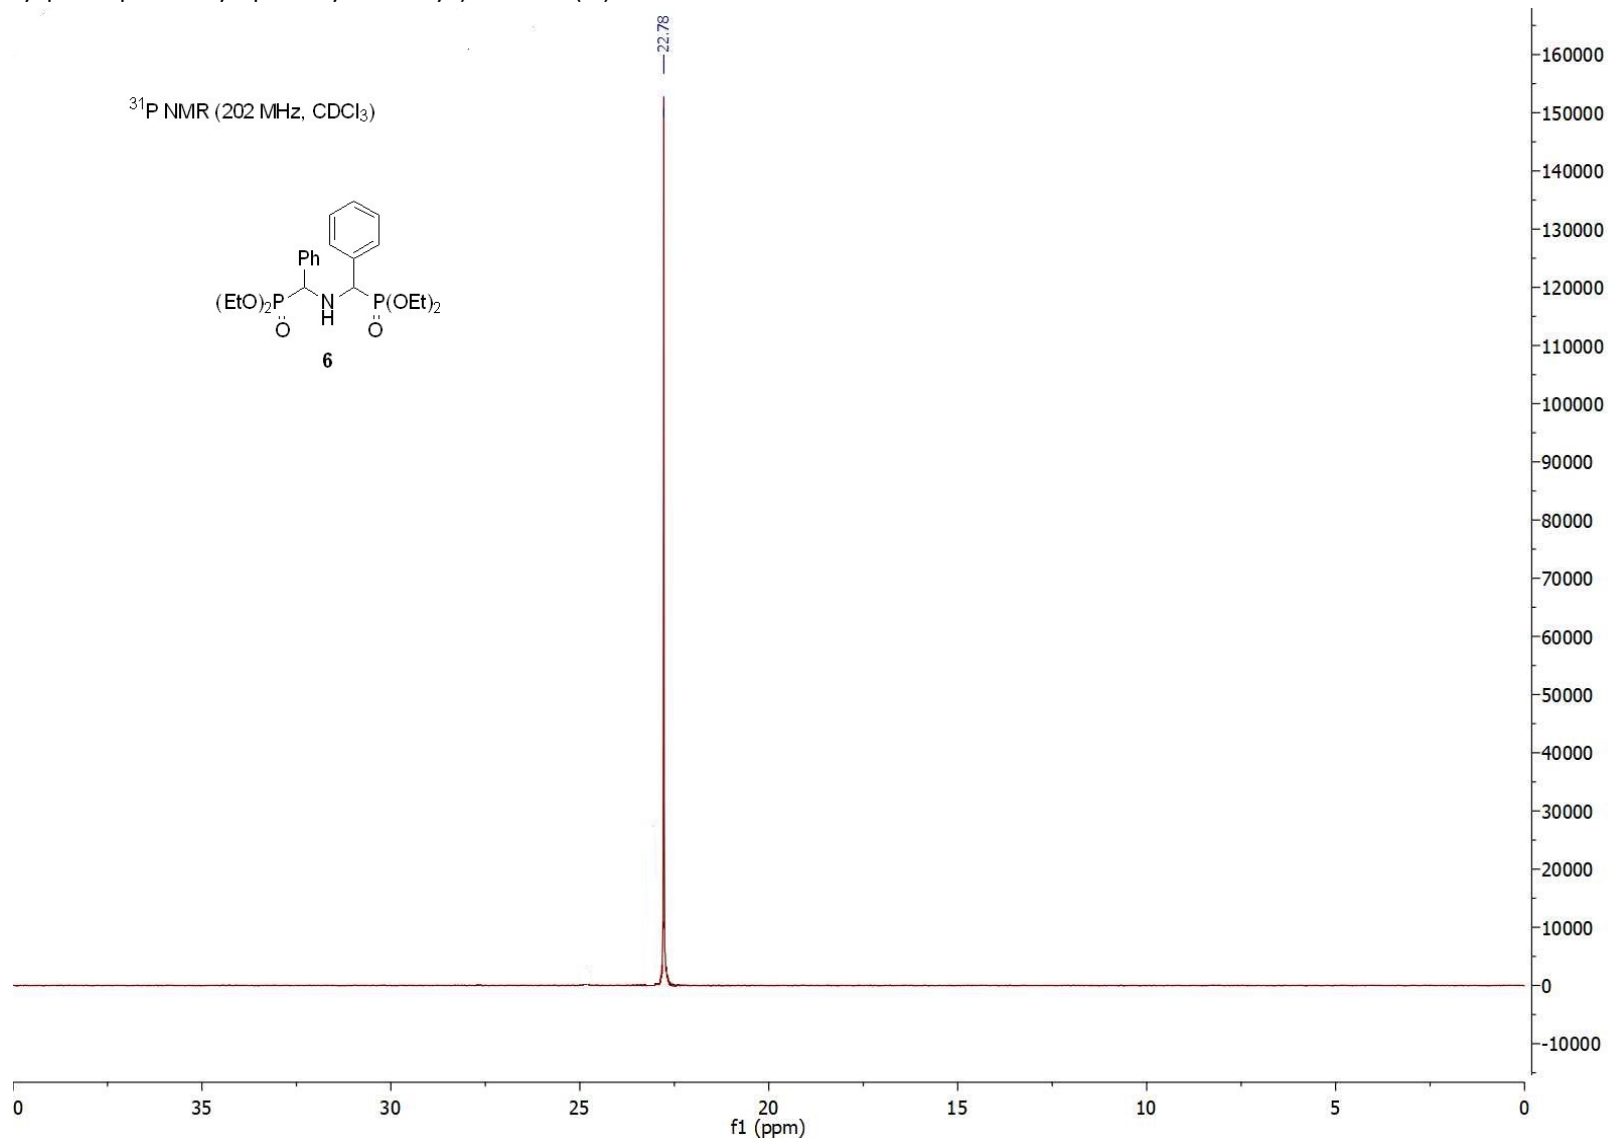

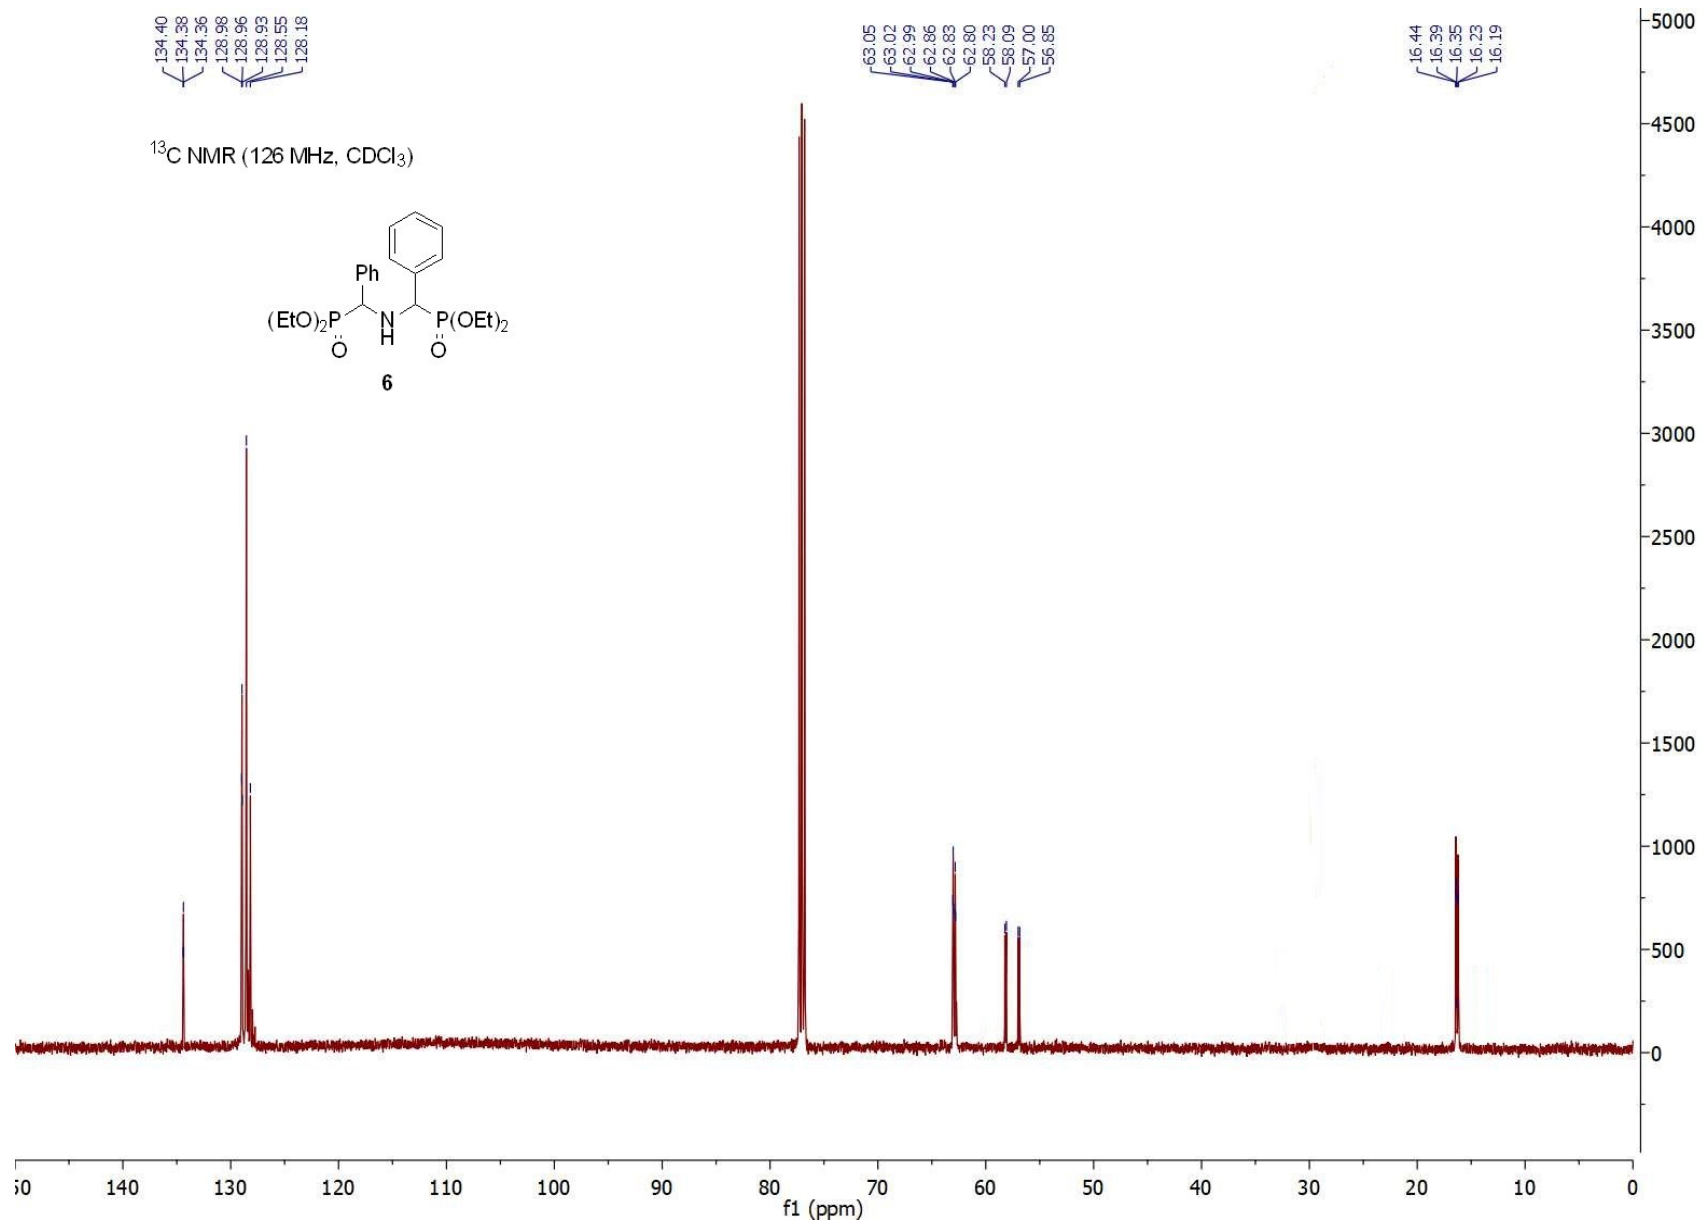



$^1\text{H}$  NMR (500 MHz,  $\text{CDCl}_3$ )

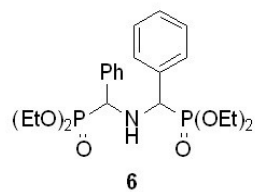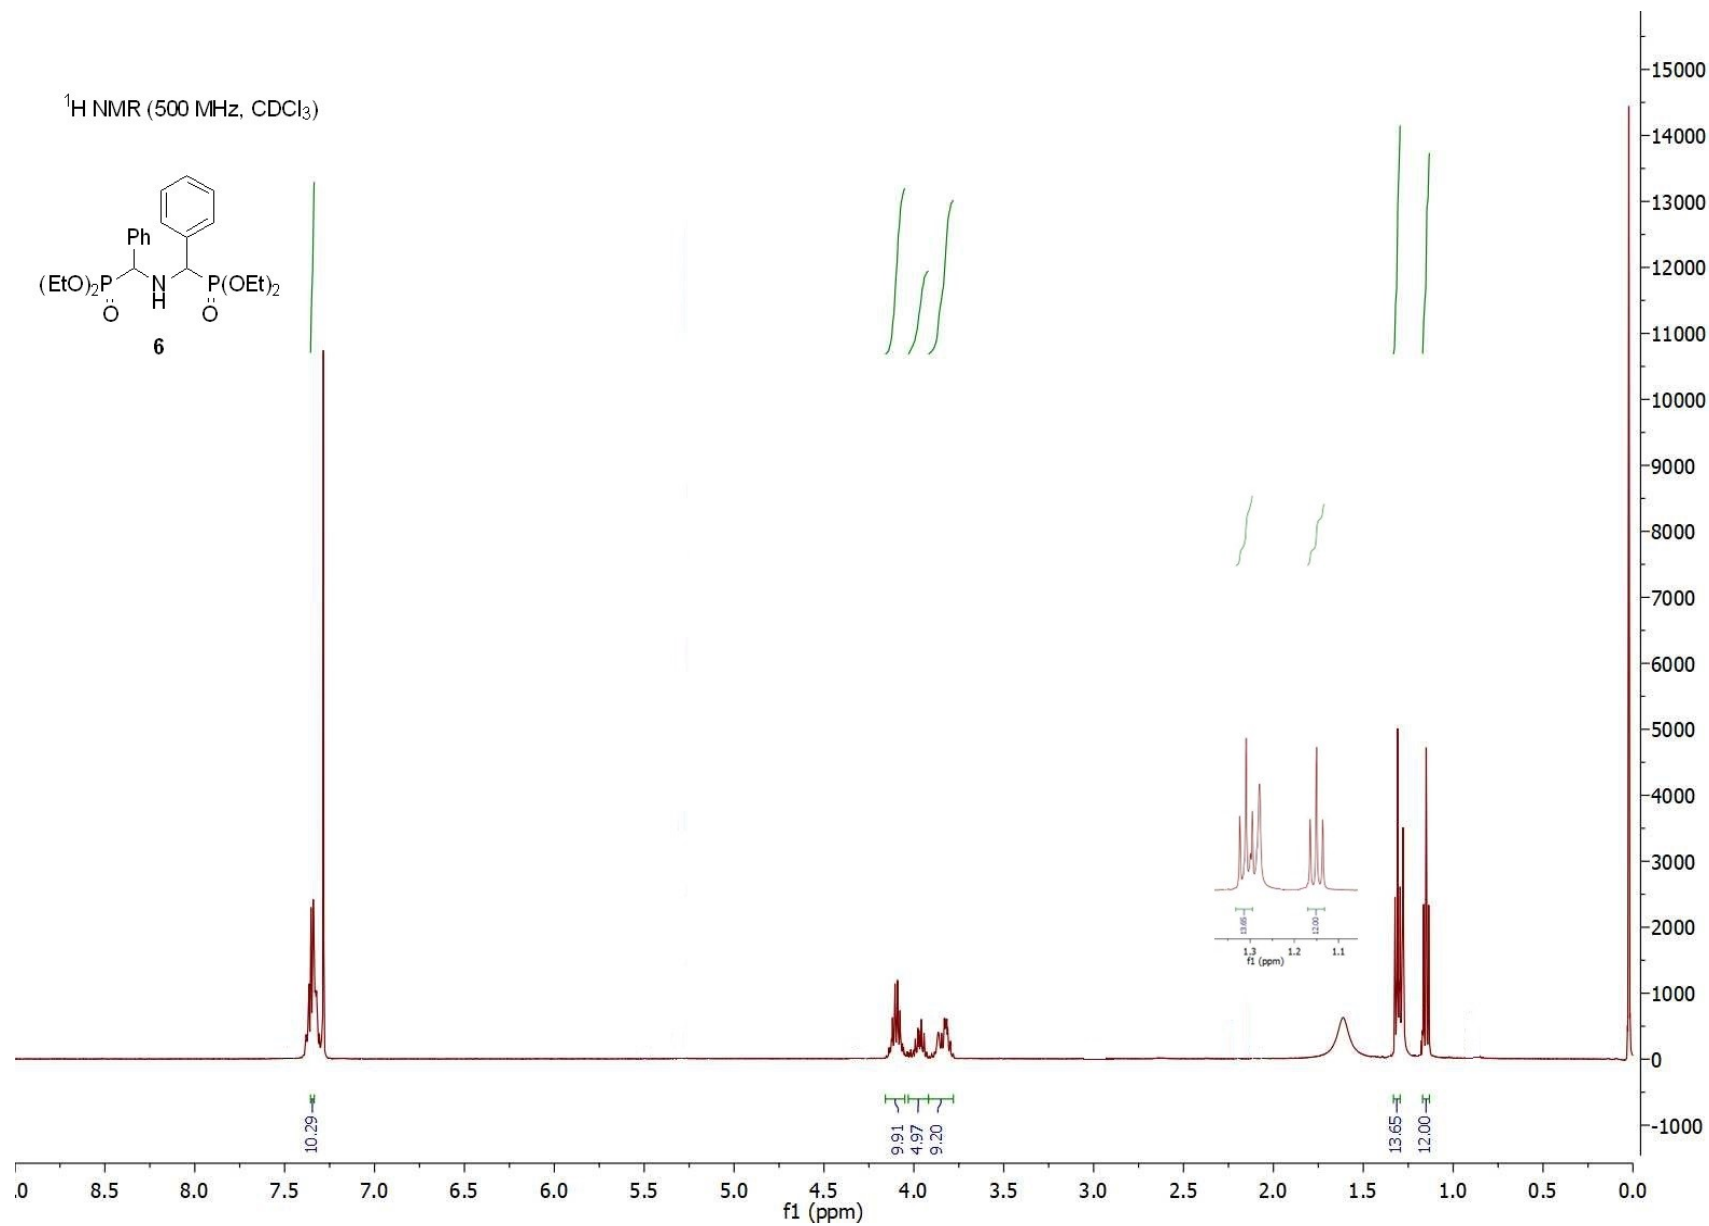

Bis(diethylphosphonomethyl)-(diethylphosphonylbenzyl)amine (**8**)

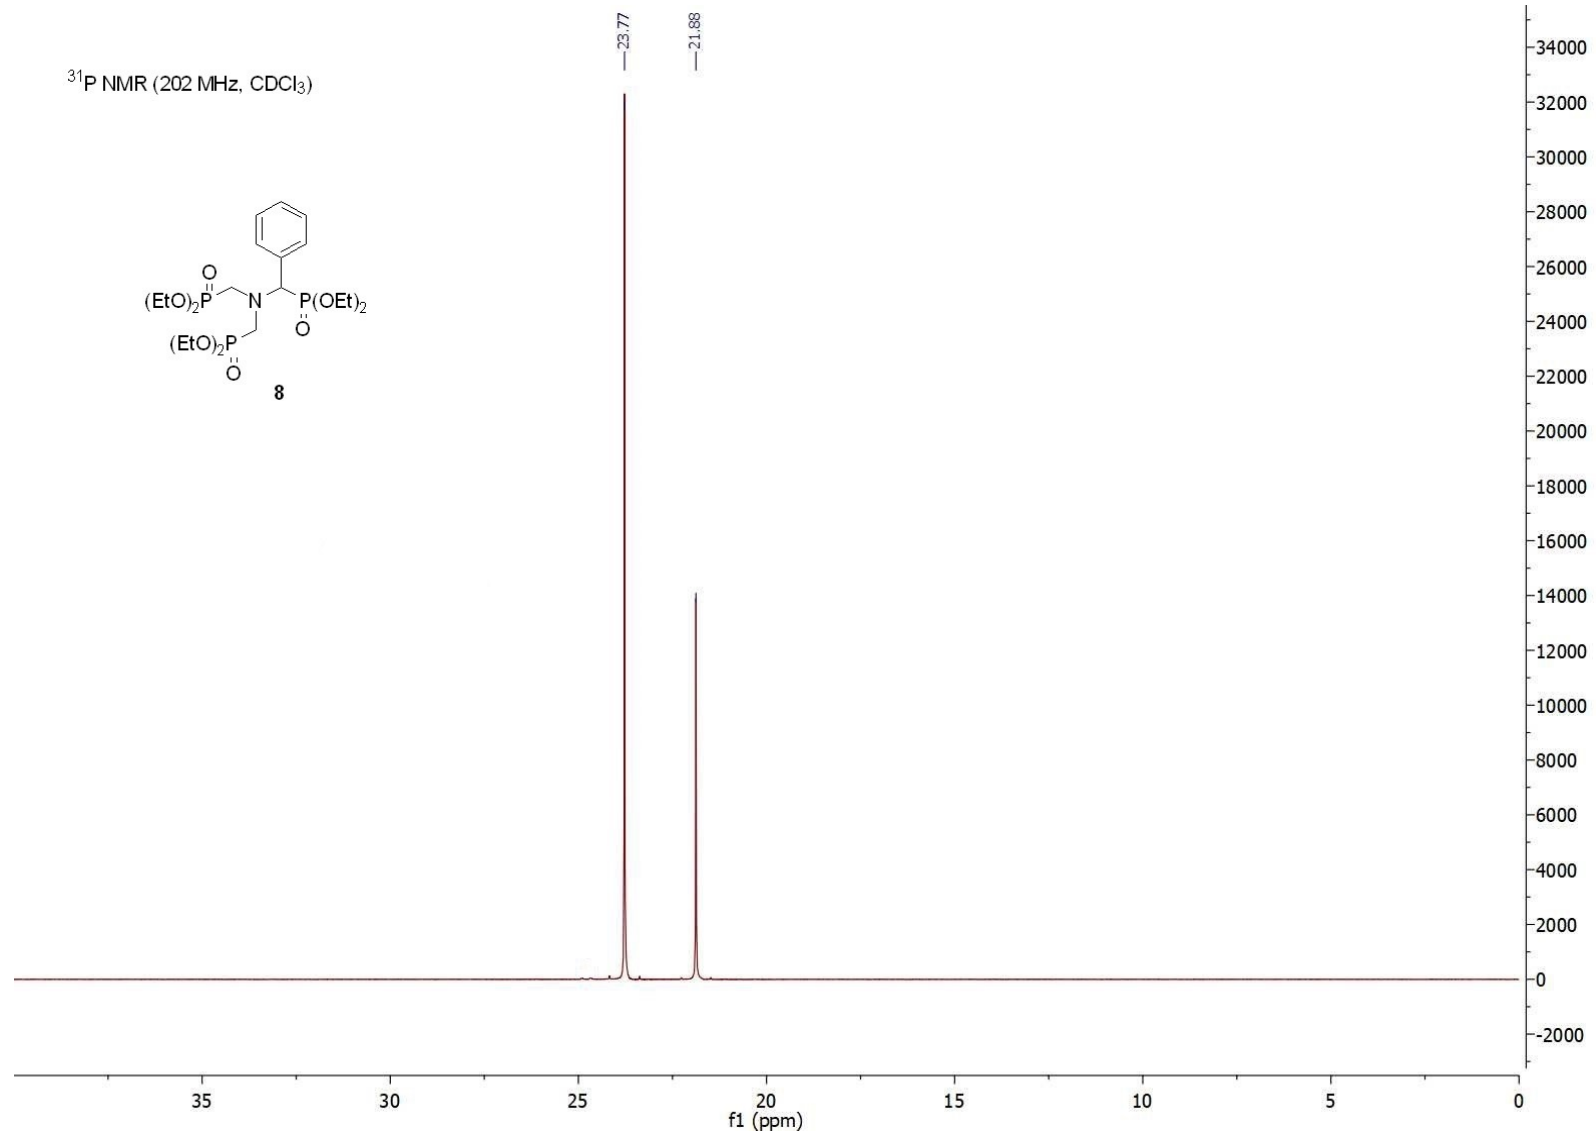

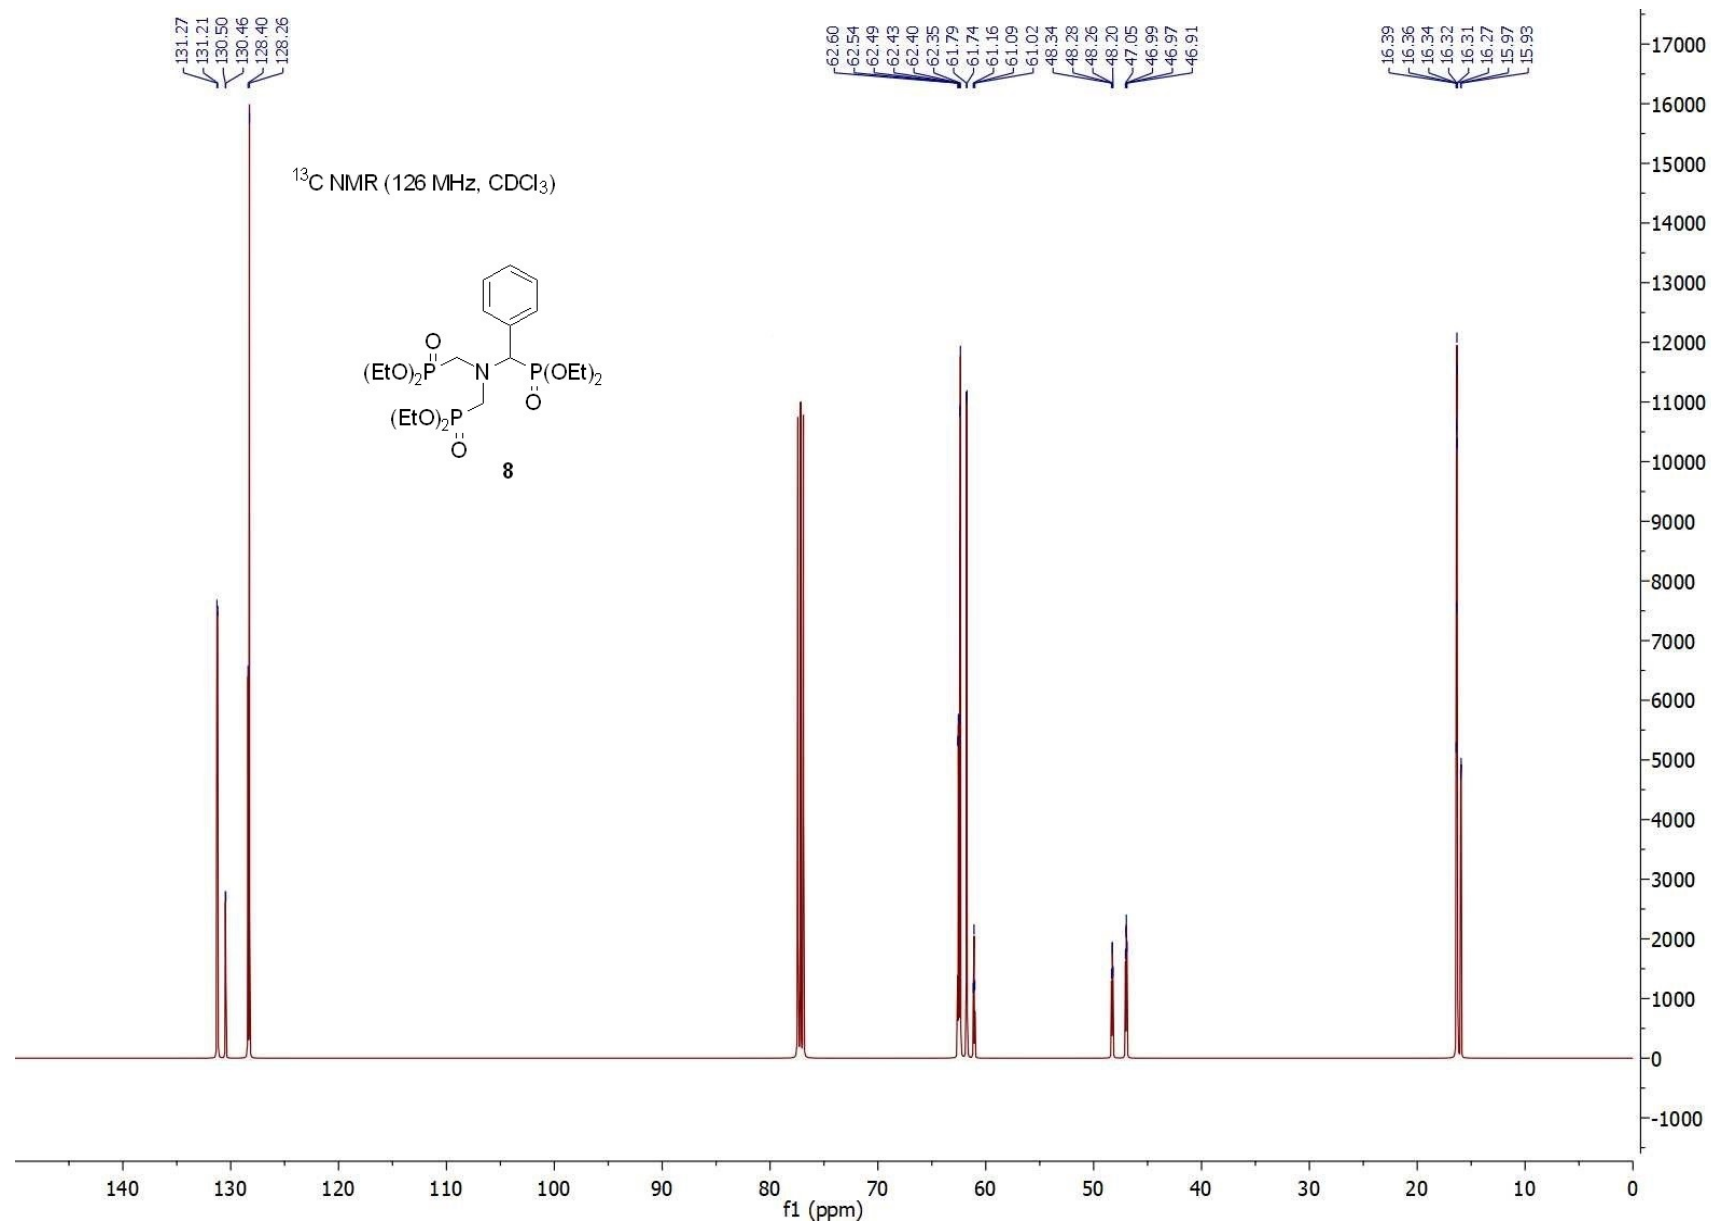

$^1\text{H}$  NMR (500 MHz,  $\text{CDCl}_3$ )

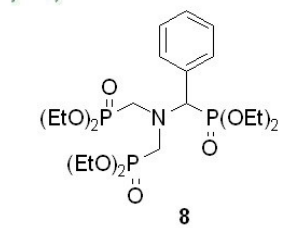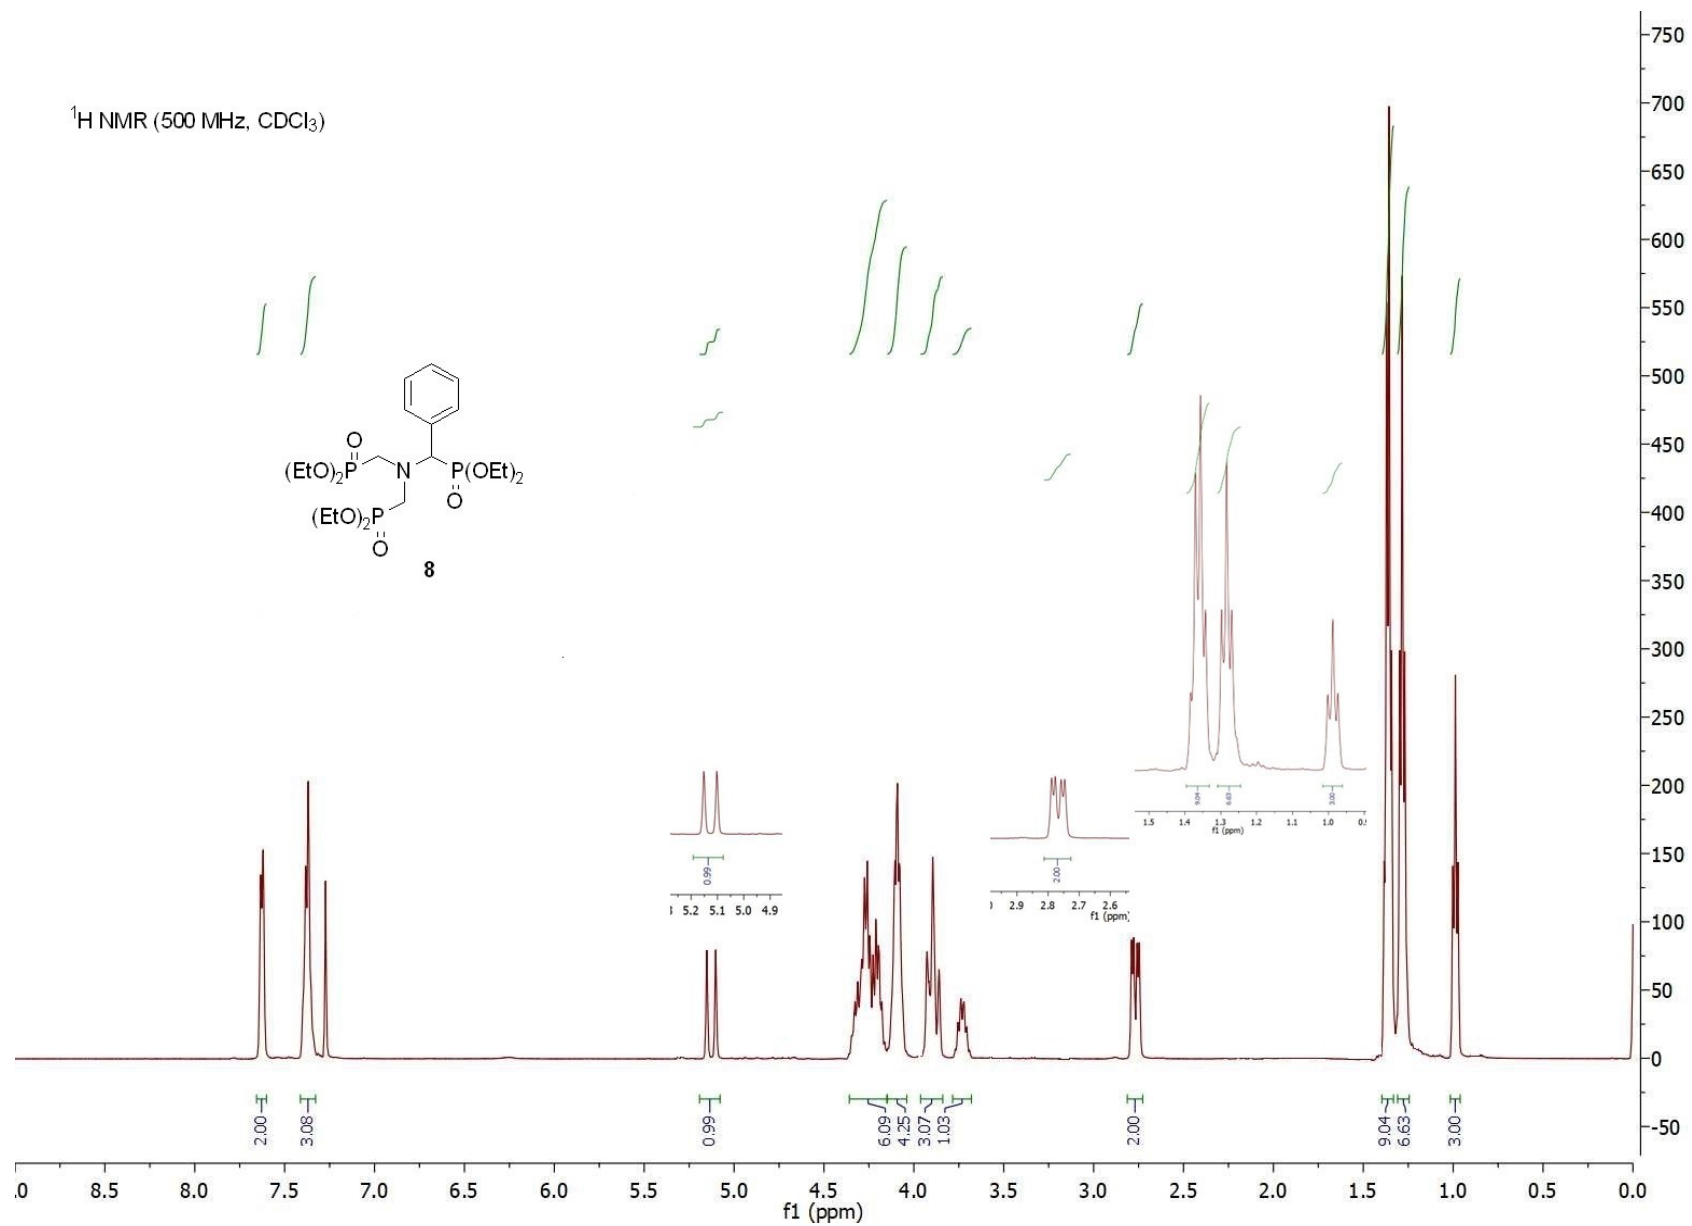

## 2.1) Experimental parameters and identification of the starting materials (1a-c)

| Product   | T (°C) | t (min) | Yield (%) | $\delta_p$ (CDCl <sub>3</sub> ) (ppm) | $\delta_p^{\text{lit}}$ (ppm) | [M+H] |
|-----------|--------|---------|-----------|---------------------------------------|-------------------------------|-------|
| <b>1a</b> | 100    | 45      | 85        | 23.5                                  | 23.7 <sup>A</sup>             | 334   |
| <b>1b</b> | 100    | 40      | 95        | 22.9                                  | 22.9 <sup>A</sup>             | 368   |
| <b>1c</b> | 100    | 90      | 87        | 23.7                                  | 23.7 <sup>B</sup>             | 348   |

A P. R. Varga, E. Dinnyési, S. Tóth, G. Szakács and G. Keglevich, *Drug Des. Discov.*, 2022, in press.

B N. Z. Kiss, A. Kaszás, L. Drahos, Z. Mucsi and G. Keglevich, *Tetrahedron Lett.*, 2012, **53**, 207.

## 2.2) $^{31}\text{P}$ NMR of starting materials (1a, 1b and 1c)

Diethyl  $\alpha$ -benzylamino-benzylphosphonate (1a)

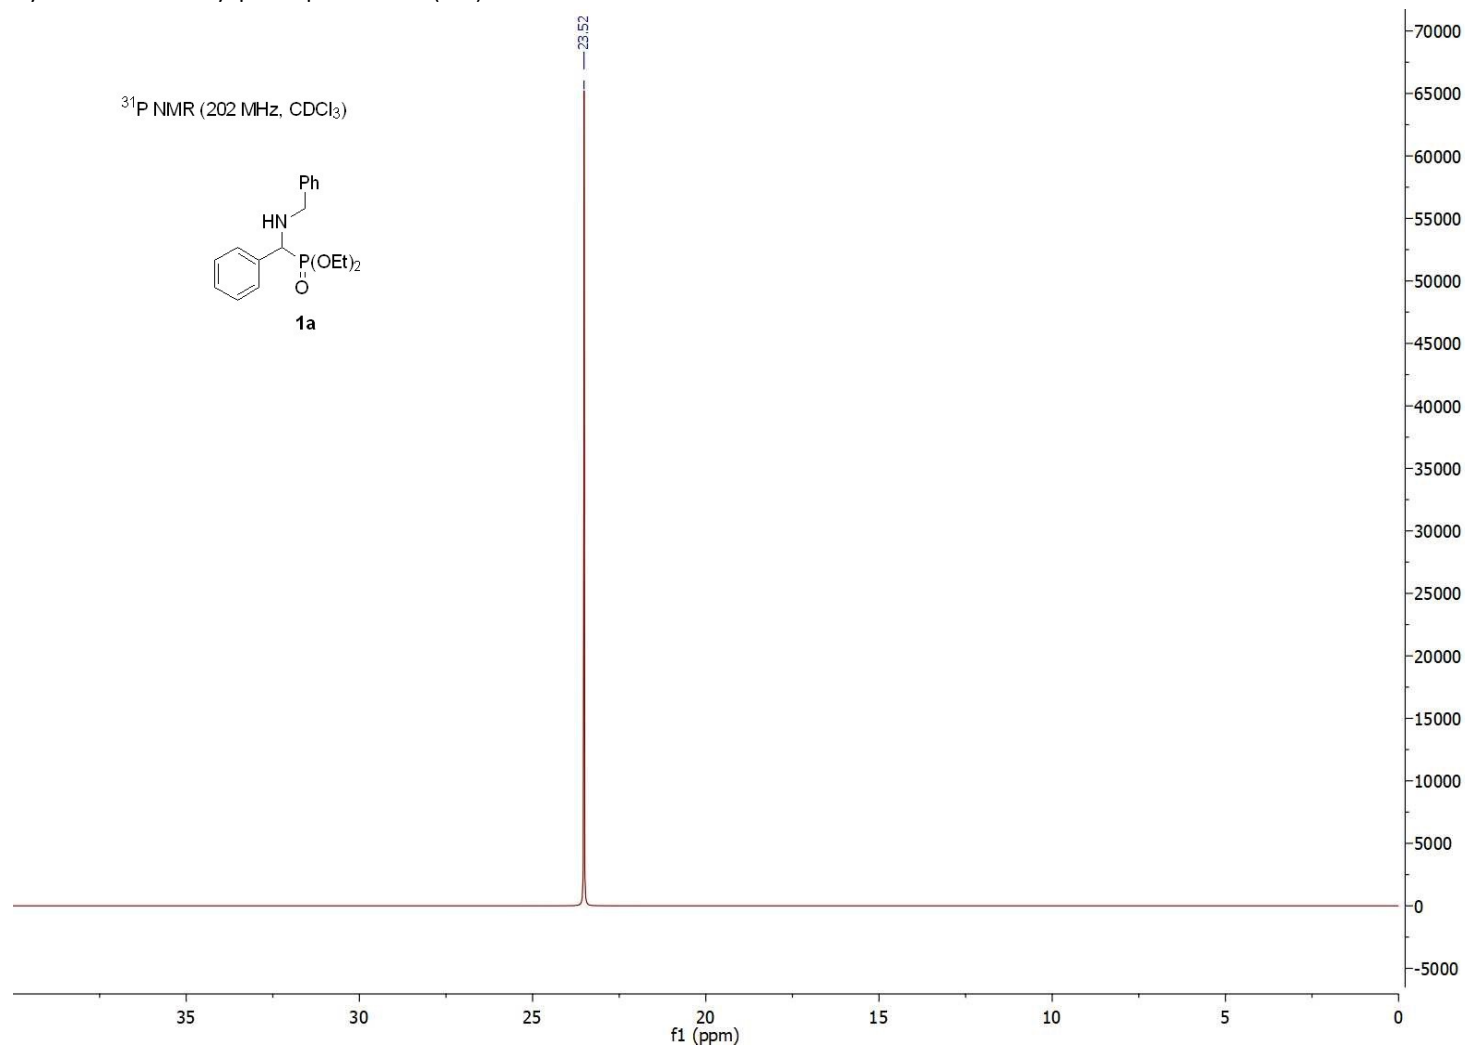

Diethyl  $\alpha$ -benzylamino-4-chlorobenzylphosphonate (**1b**)

$^{31}\text{P}$  NMR (202 MHz,  $\text{CDCl}_3$ )

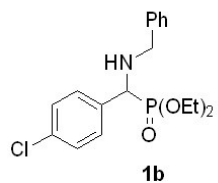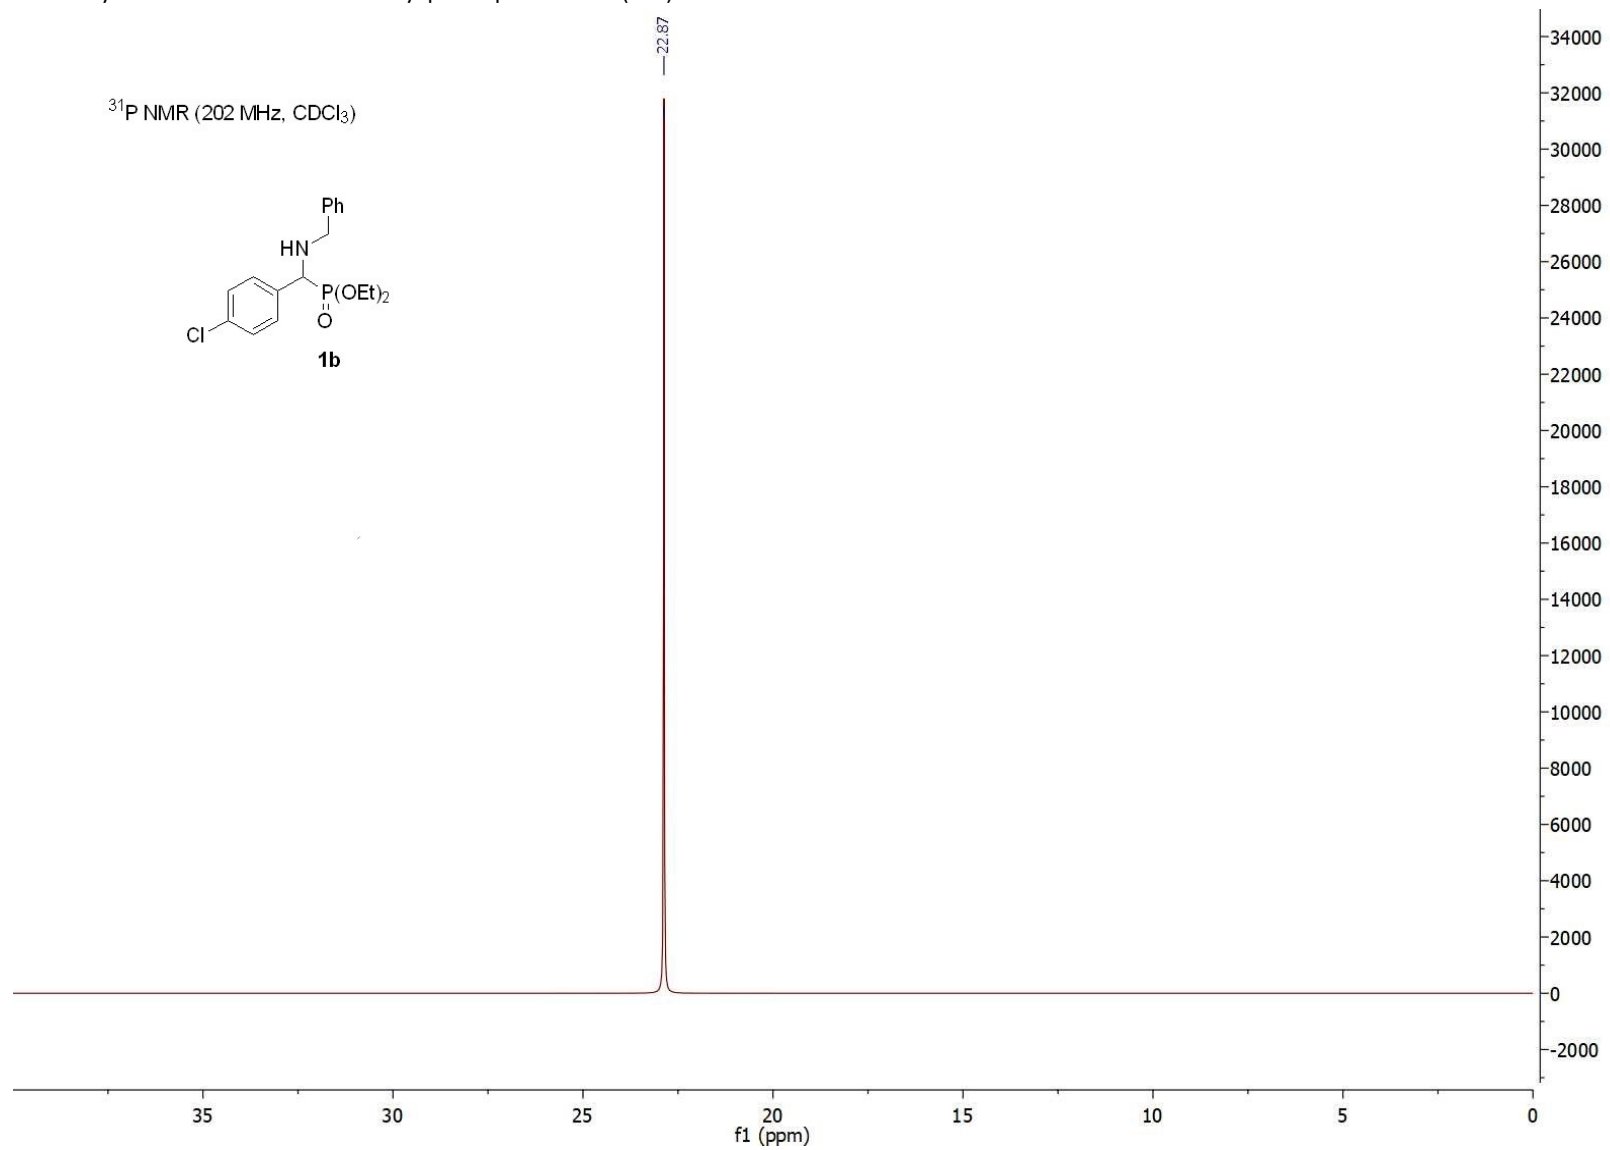

Diethyl  $\alpha$ -benzylamino-4-methylbenzylphosphonate (**1c**)

$^{31}\text{P}$  NMR (202 MHz,  $\text{CDCl}_3$ )

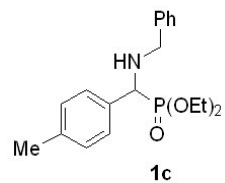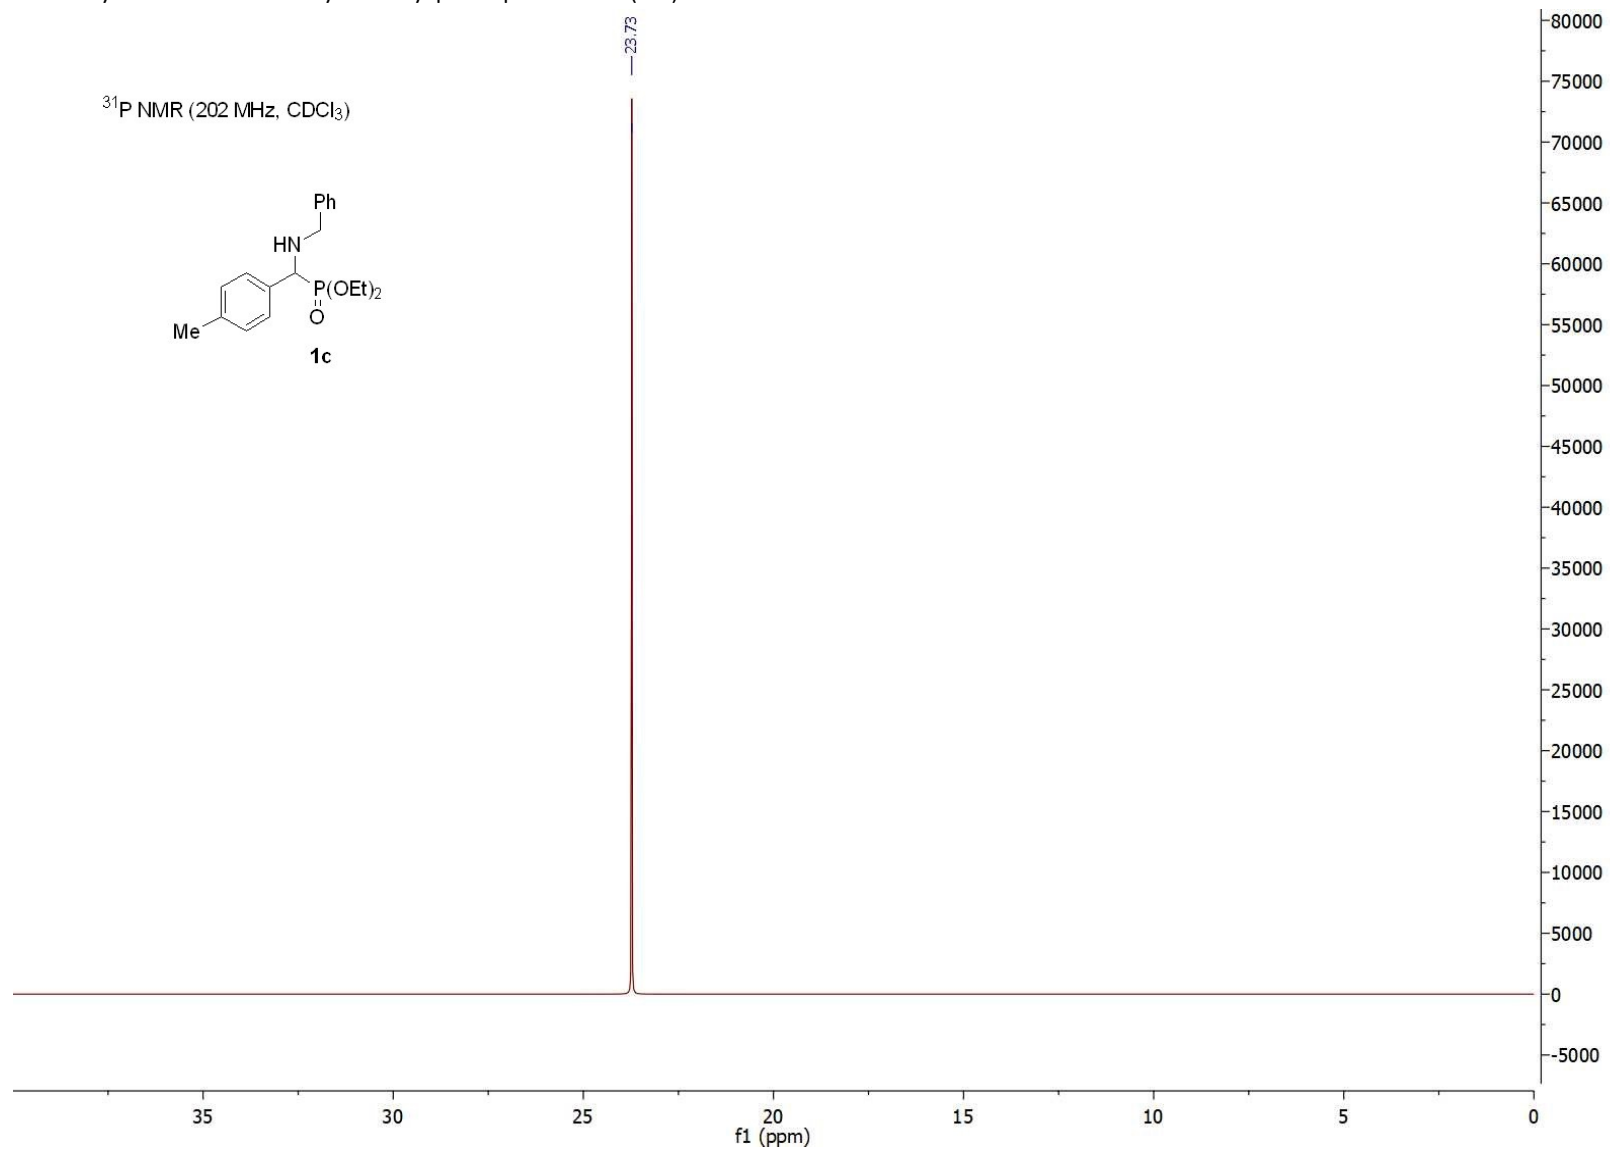



### 3.) $^{13}\text{C}$ and $^1\text{H}$ NMR data of compounds **5a**, **5b**, **5c** and **5d** obtained by a 2D NMR study

#### Four P-OCH<sub>2</sub>CH<sub>3</sub> groups:

I:  $\delta^1\text{H}$  = 4.18 (m, 2H, OCH<sub>2</sub>), 1.30 (td,  $^3J_{\text{HH}}$  = 7.1 Hz,  $^4J_{\text{PH}}$  = 0.5 Hz, 3H, CH<sub>3</sub>);  $\delta^{13}\text{C}$  = 62.6 (d,  $^2J_{\text{PC}}$  = 7.1 Hz, OCH<sub>2</sub>), 16.5 (d,  $^3J_{\text{PC}}$  = 6.4 Hz, CH<sub>3</sub>).

II:  $\delta^1\text{H}$  = 4.05 (m, 2H, OCH<sub>2</sub>), 1.23 (td,  $^3J_{\text{HH}}$  = 7.1 Hz,  $^4J_{\text{PH}}$  = 0.4 Hz, 3H, CH<sub>3</sub>);  $\delta^{13}\text{C}$  = 62.3 (d,  $^2J_{\text{PC}}$  = 6.8 Hz, OCH<sub>2</sub>), 16.4 (d,  $^3J_{\text{PC}}$  = 6.1 Hz, CH<sub>3</sub>).

III:  $\delta^1\text{H}$  = 3.95 (m, 2H, OCH<sub>2</sub>), 1.18 (t,  $^3J_{\text{HH}}$  = 7.1 Hz, 3H, CH<sub>3</sub>);  $\delta^{13}\text{C}$  = 61.8 (d,  $^2J_{\text{PC}}$  = 6.6 Hz, OCH<sub>2</sub>), 16.3 (d,  $^3J_{\text{PC}}$  = 6.3 Hz, CH<sub>3</sub>).

IV:  $\delta^1\text{H}$  = 3.82 (m, 1H, OCH<sub>2</sub>), 3.64 (m, 1H, OCH<sub>2</sub>), 0.91 (td,  $^3J_{\text{HH}}$  = 7.1 Hz,  $^4J_{\text{PH}}$  = 0.3 Hz, 3H, CH<sub>3</sub>);  $\delta^{13}\text{C}$  = 62.5 (d,  $^2J_{\text{PC}}$  = 7.1 Hz, OCH<sub>2</sub>), 16.1 (d,  $^3J_{\text{PC}}$  = 5.7 Hz, CH<sub>3</sub>).

**5a**

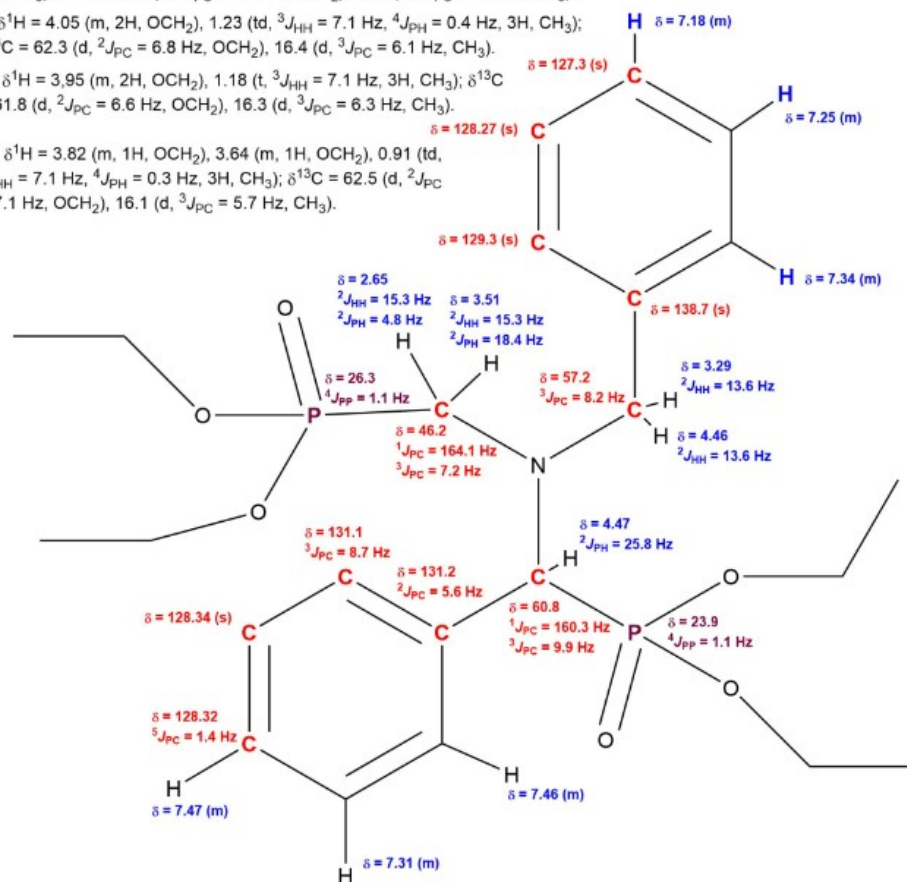

5b

**Four P-OCH<sub>2</sub>CH<sub>3</sub> groups:**

I:  $\delta^1\text{H} = 4.18$  (m, 2H, OCH<sub>2</sub>), 1.31 (td,  $^3J_{\text{HH}} = 7.1$  Hz,  $^4J_{\text{PH}} = 0.6$  Hz, 3H, CH<sub>3</sub>);  $\delta^{13}\text{C} = 62.7$  (d,  $^2J_{\text{PC}} = 7.1$  Hz, OCH<sub>2</sub>), 16.5 (d,  $^3J_{\text{PC}} = 6.4$  Hz, CH<sub>3</sub>).

II:  $\delta^1\text{H} = 4.02$  (m, 2H, OCH<sub>2</sub>), 1.23 (td,  $^3J_{\text{HH}} = 7.1$  Hz,  $^4J_{\text{PH}} = 0.5$  Hz, 3H, CH<sub>3</sub>);  $\delta^{13}\text{C} = 62.2$  (d,  $^2J_{\text{PC}} = 6.8$  Hz, OCH<sub>2</sub>), 16.4 (d,  $^3J_{\text{PC}} = 6.4$  Hz, CH<sub>3</sub>).

III:  $\delta^1\text{H} = 3.94$  (m, 2H, OCH<sub>2</sub>), 1.17 (td,  $^3J_{\text{HH}} = 7.1$  Hz,  $^4J_{\text{PH}} = 0.4$  Hz, 3H, CH<sub>3</sub>);  $\delta^{13}\text{C} = 61.8$  (d,  $^2J_{\text{PC}} = 6.6$  Hz, OCH<sub>2</sub>), 16.3 (d,  $^3J_{\text{PC}} = 6.1$  Hz, CH<sub>3</sub>).

IV:  $\delta^1\text{H} = 3.85$  (m, 1H, OCH<sub>2</sub>), 3.70 (m, 1H, OCH<sub>2</sub>), 0.97 (td,  $^3J_{\text{HH}} = 7.1$  Hz,  $^4J_{\text{PH}} = 0.5$  Hz, 3H, CH<sub>3</sub>);  $\delta^{13}\text{C} = 62.4$  (d,  $^2J_{\text{PC}} = 7.1$  Hz, OCH<sub>2</sub>), 16.1 (d,  $^3J_{\text{PC}} = 5.6$  Hz, CH<sub>3</sub>).

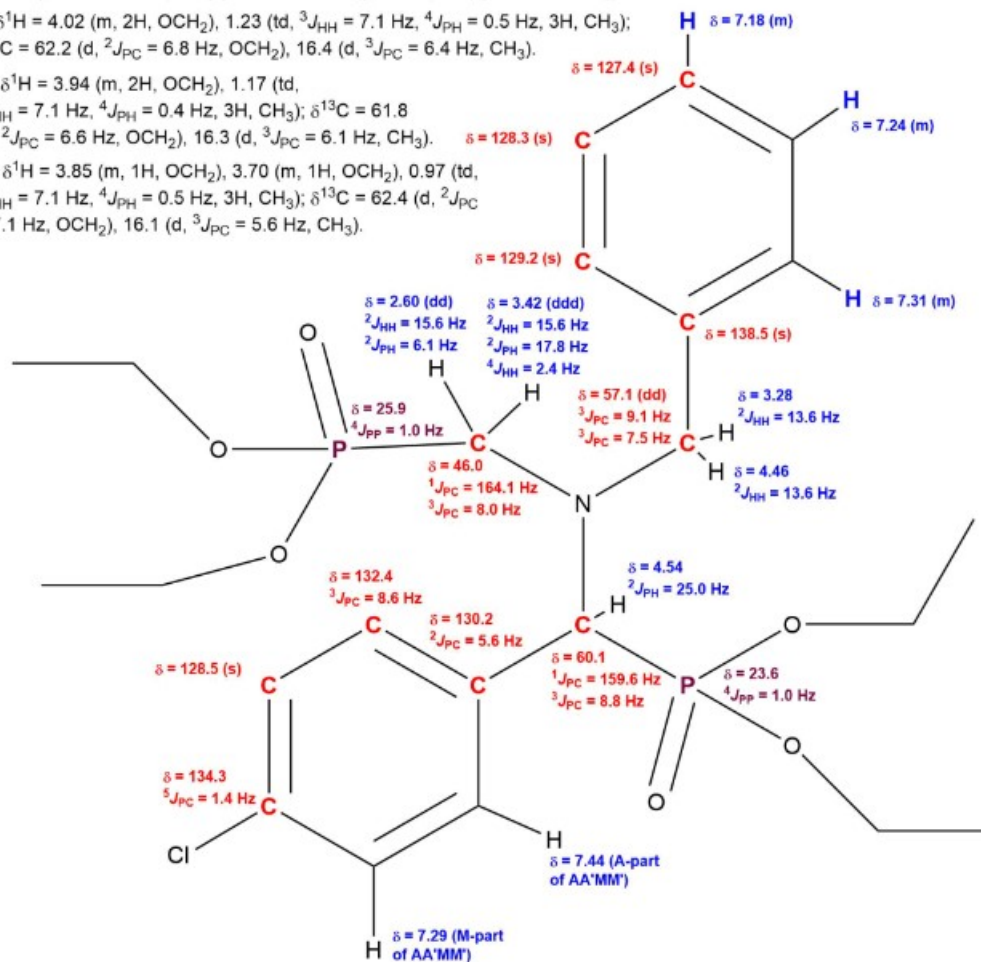

Four P-OCH<sub>2</sub>CH<sub>3</sub> groups:

I:  $\delta^1\text{H} = 4.17$  (m, 2H, OCH<sub>2</sub>), 1.30 (td,  $^3J_{\text{HH}} = 7.6$  Hz,  $^4J_{\text{PH}} = 0.5$  Hz, 3H, CH<sub>3</sub>);  $\delta^{13}\text{C} = 62.5$  (d,  $^2J_{\text{PC}} = 7.1$  Hz, OCH<sub>2</sub>), 16.5 (d,  $^3J_{\text{PC}} = 6.4$  Hz, CH<sub>3</sub>).

II:  $\delta^1\text{H} = 4.05$  (m, 2H, OCH<sub>2</sub>), 1.24 (td,  $^3J_{\text{HH}} = 7.0$  Hz,  $^4J_{\text{PH}} = 0.4$  Hz, 3H, CH<sub>3</sub>);  $\delta^{13}\text{C} = 62.2$  (d,  $^2J_{\text{PC}} = 6.8$  Hz, OCH<sub>2</sub>), 16.4 (d,  $^3J_{\text{PC}} = 6.4$  Hz, CH<sub>3</sub>).

III:  $\delta^1\text{H} = 3.95$  (m, 2H, OCH<sub>2</sub>), 1.18 (td,  $^3J_{\text{HH}} = 6.7$  Hz,  $^4J_{\text{PH}} = 0.4$  Hz, 3H, CH<sub>3</sub>);  $\delta^{13}\text{C} = 61.7$  (d,  $^2J_{\text{PC}} = 6.6$  Hz, OCH<sub>2</sub>), 16.3 (d,  $^3J_{\text{PC}} = 6.1$  Hz, CH<sub>3</sub>).

IV:  $\delta^1\text{H} = 3.82$  (m, 1H, OCH<sub>2</sub>), 3.63 (m, 1H, OCH<sub>2</sub>), 0.92 (td,  $^3J_{\text{HH}} = 7.1$  Hz,  $^4J_{\text{PH}} = 0.3$  Hz, 3H, CH<sub>3</sub>);  $\delta^{13}\text{C} = 62.4$  (d,  $^2J_{\text{PC}} = 7.0$  Hz, OCH<sub>2</sub>), 16.1 (d,  $^3J_{\text{PC}} = 5.6$  Hz, CH<sub>3</sub>).

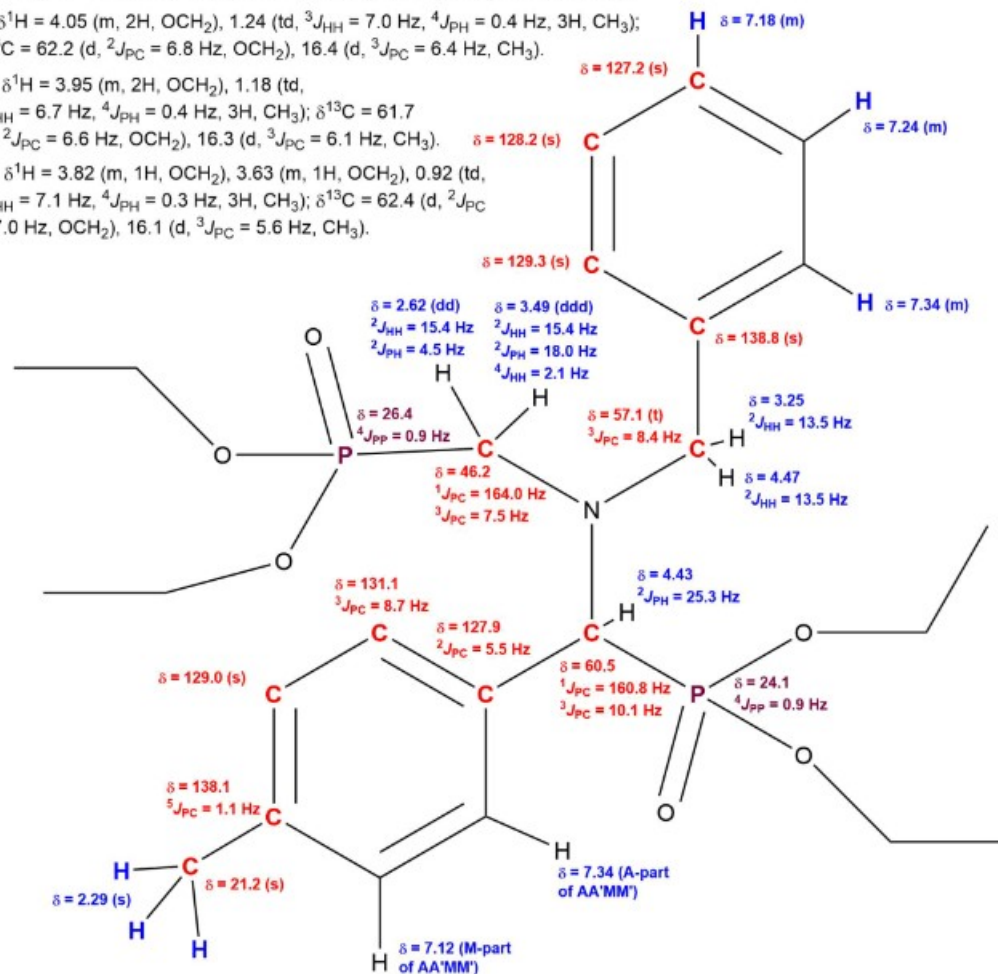

5d

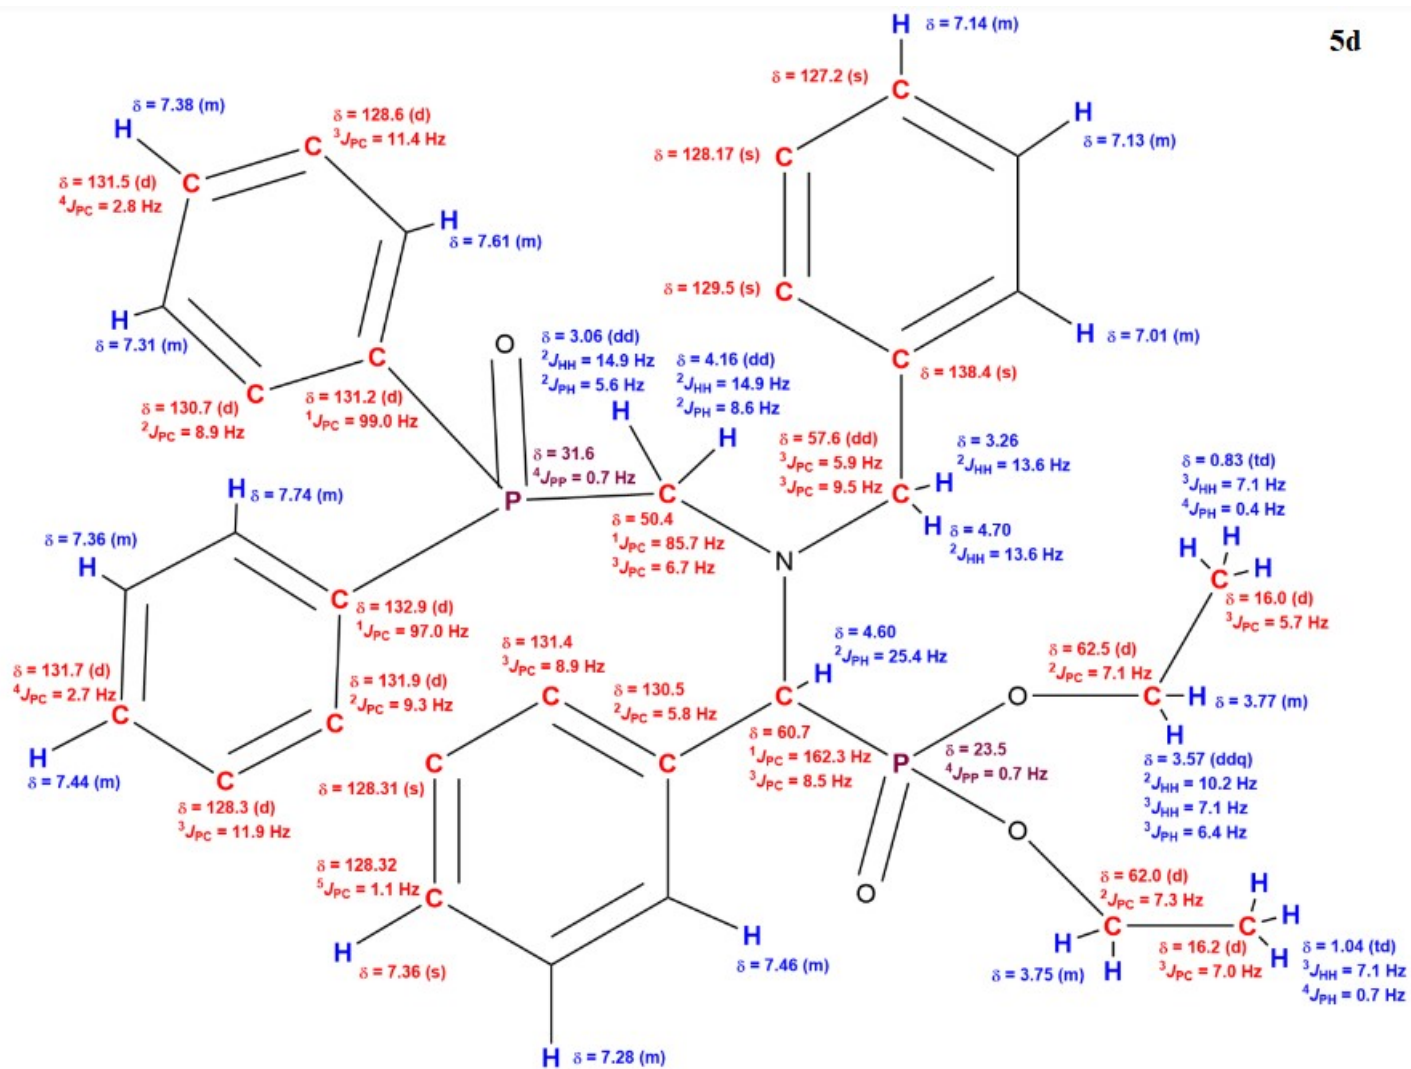

#### 4.) $^1\text{H}$ and $^{13}\text{C}$ NMR spectra on the equilibrium of the rotamers of **3b**

Segment of the  $^1\text{H}$  NMR spectrum on the equilibrium of the rotamers of **3b**

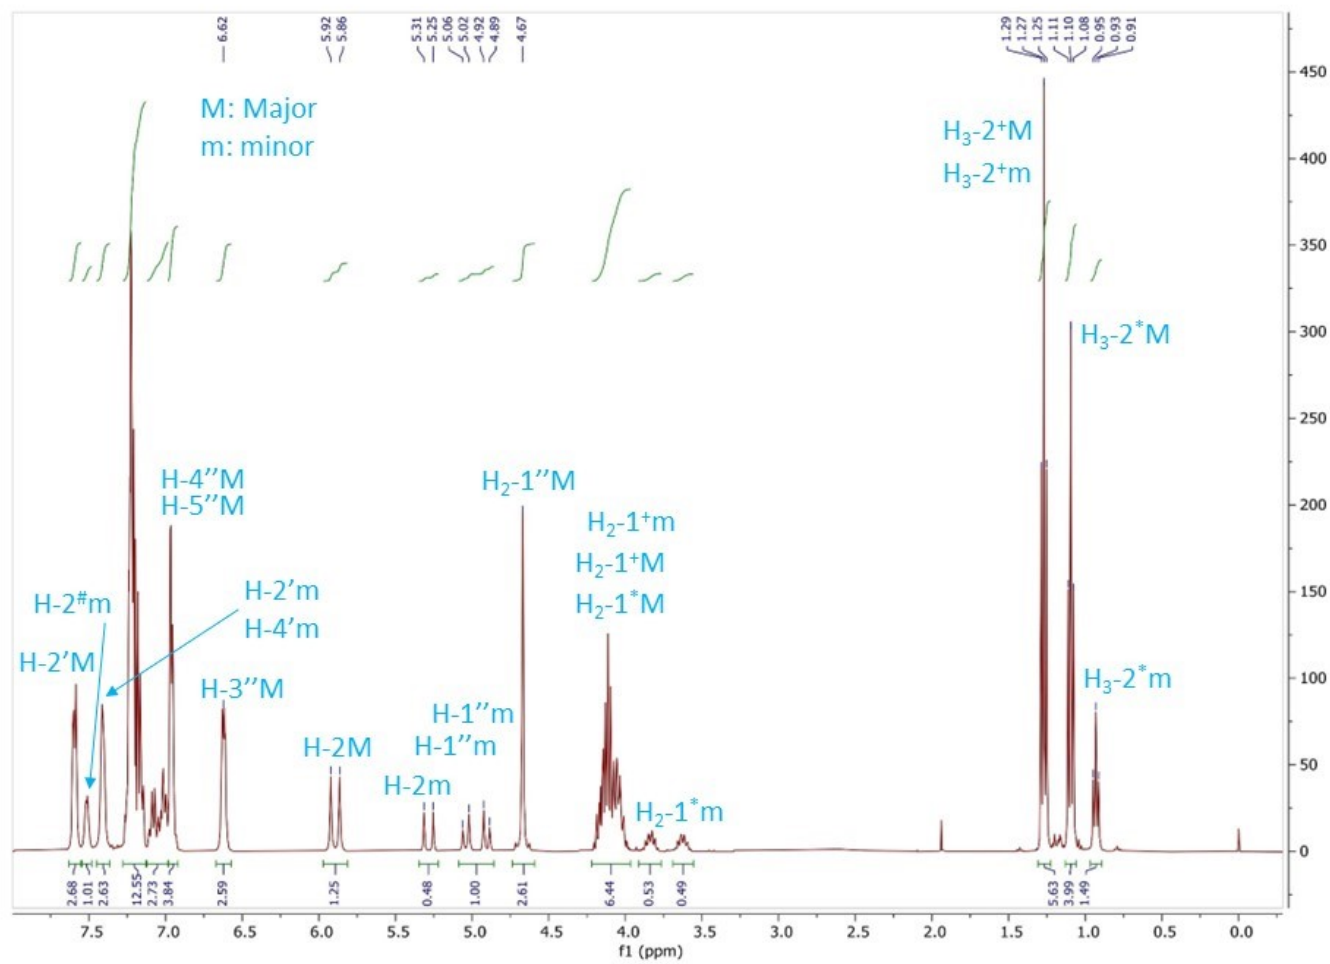

Segment of the  $^{13}\text{C}$  NMR spectrum on the equilibrium of the rotamers of **3b**

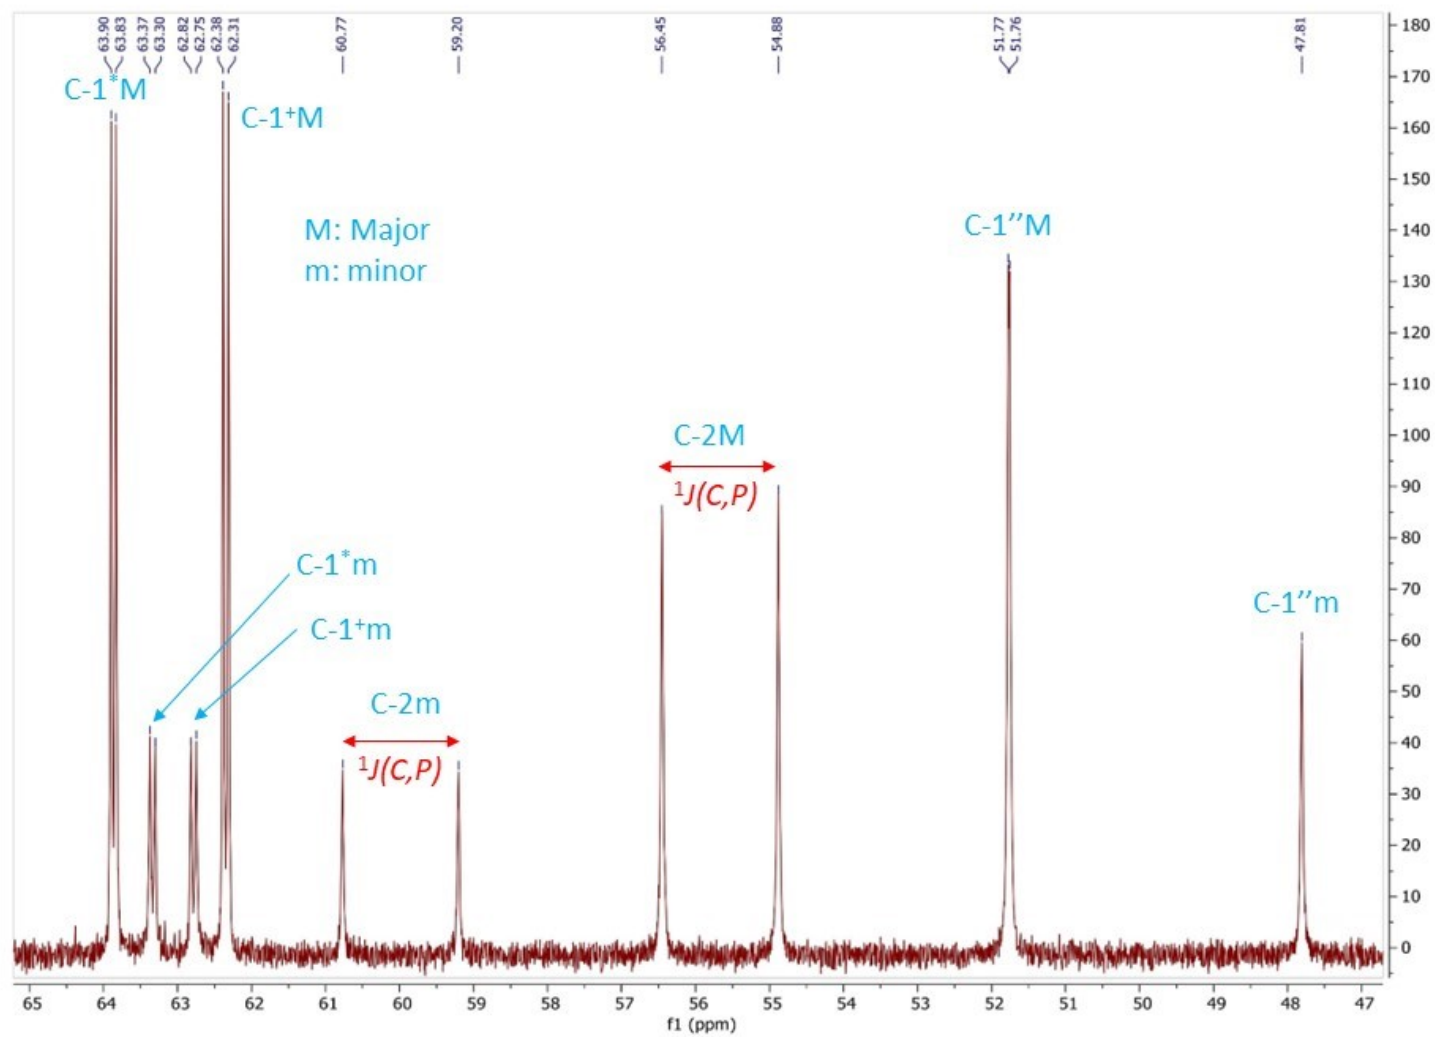

Segment of the HSQC NMR spectrum on the equilibrium of the rotamers of **3b**

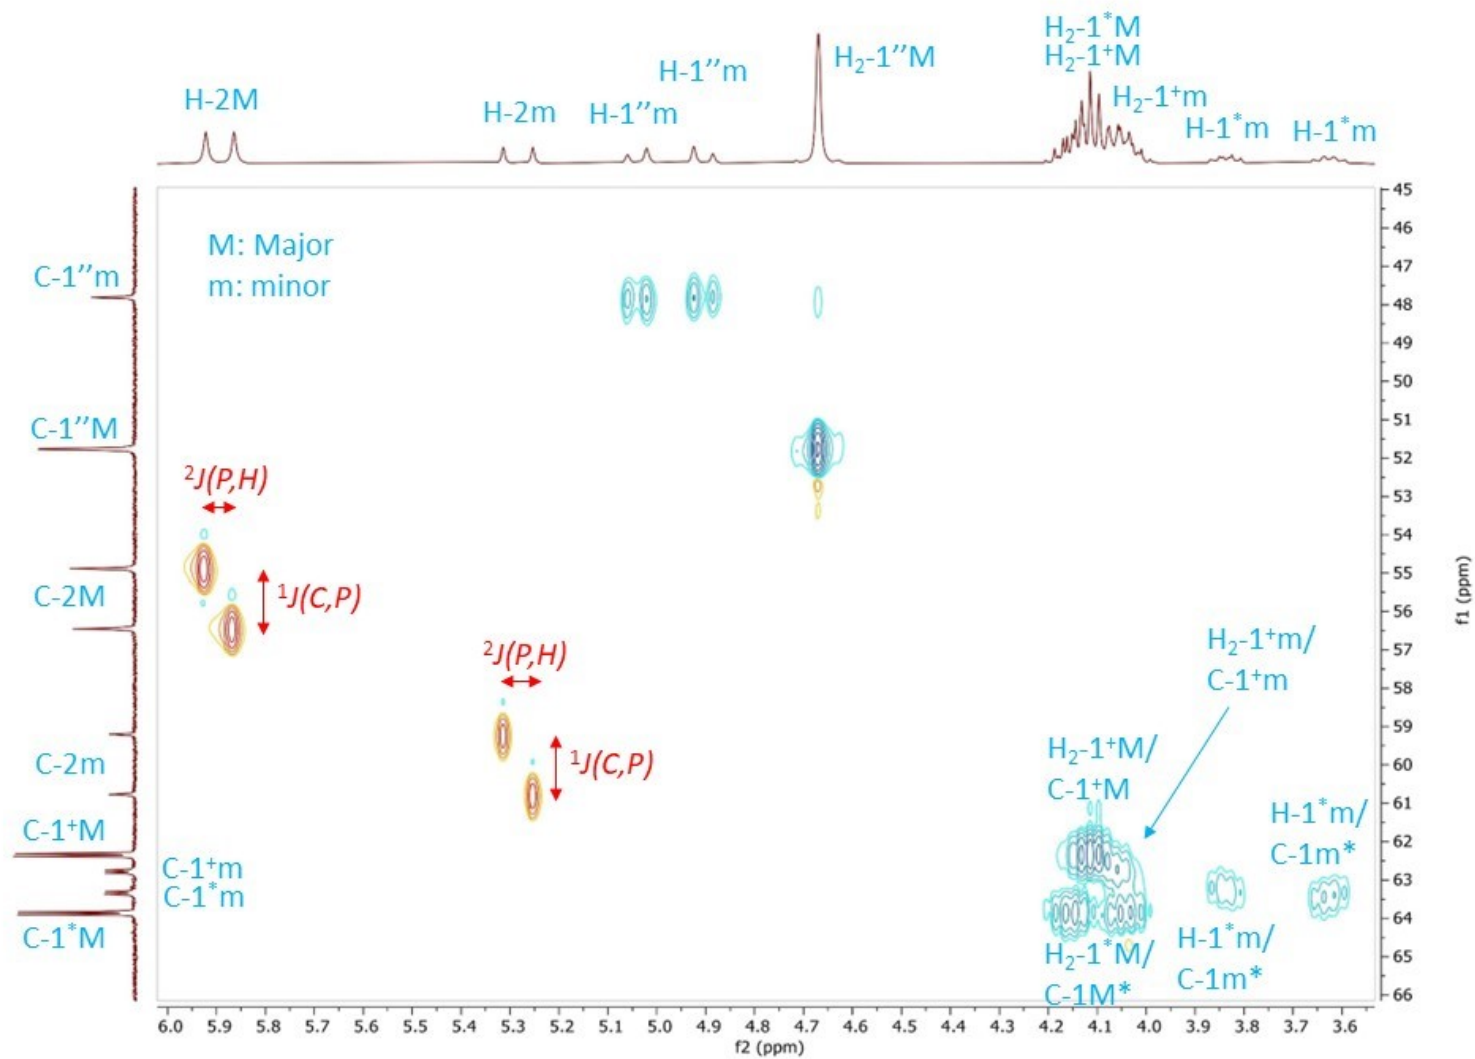



Segment of the HMBC NMR spectrum on the equilibrium of the rotamers of **3b**

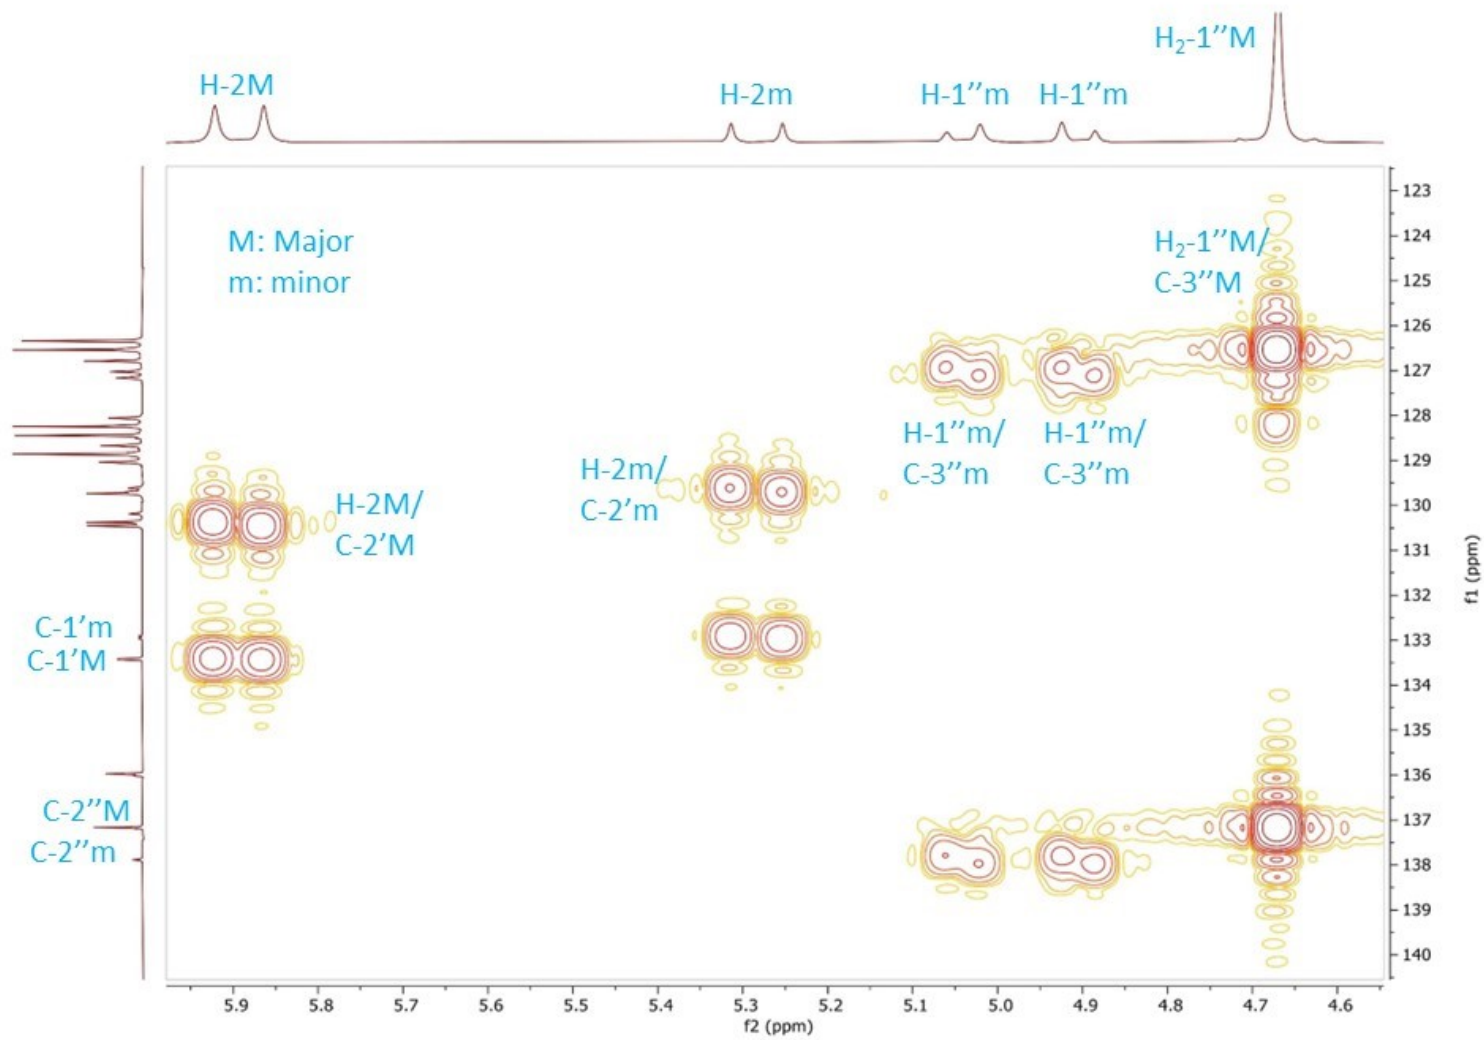



$^{13}\text{C}$  and  $^1\text{H}$  NMR data for the two rotamers:

3b-A (72%)

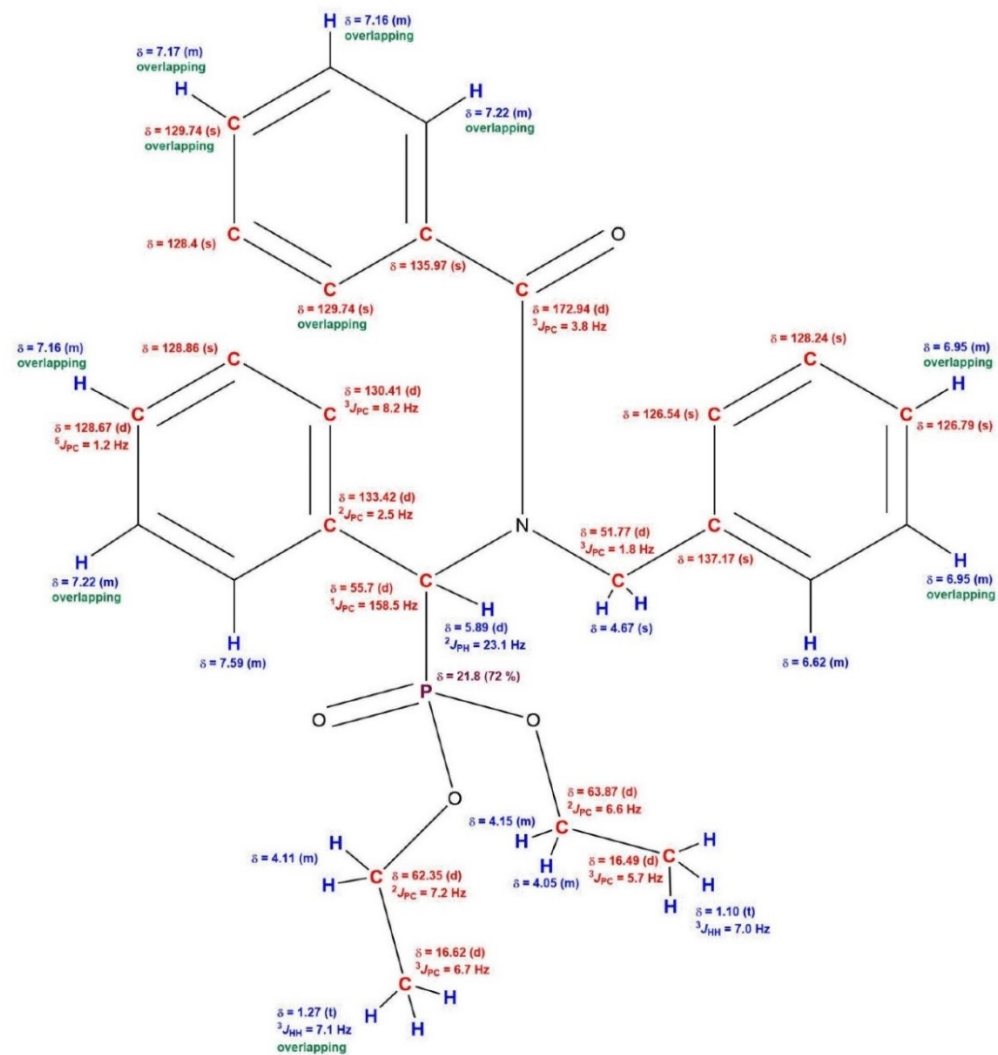

$^{13}\text{C}$  and  $^1\text{H}$  NMR data for the two rotamers:

3b-B (28%)

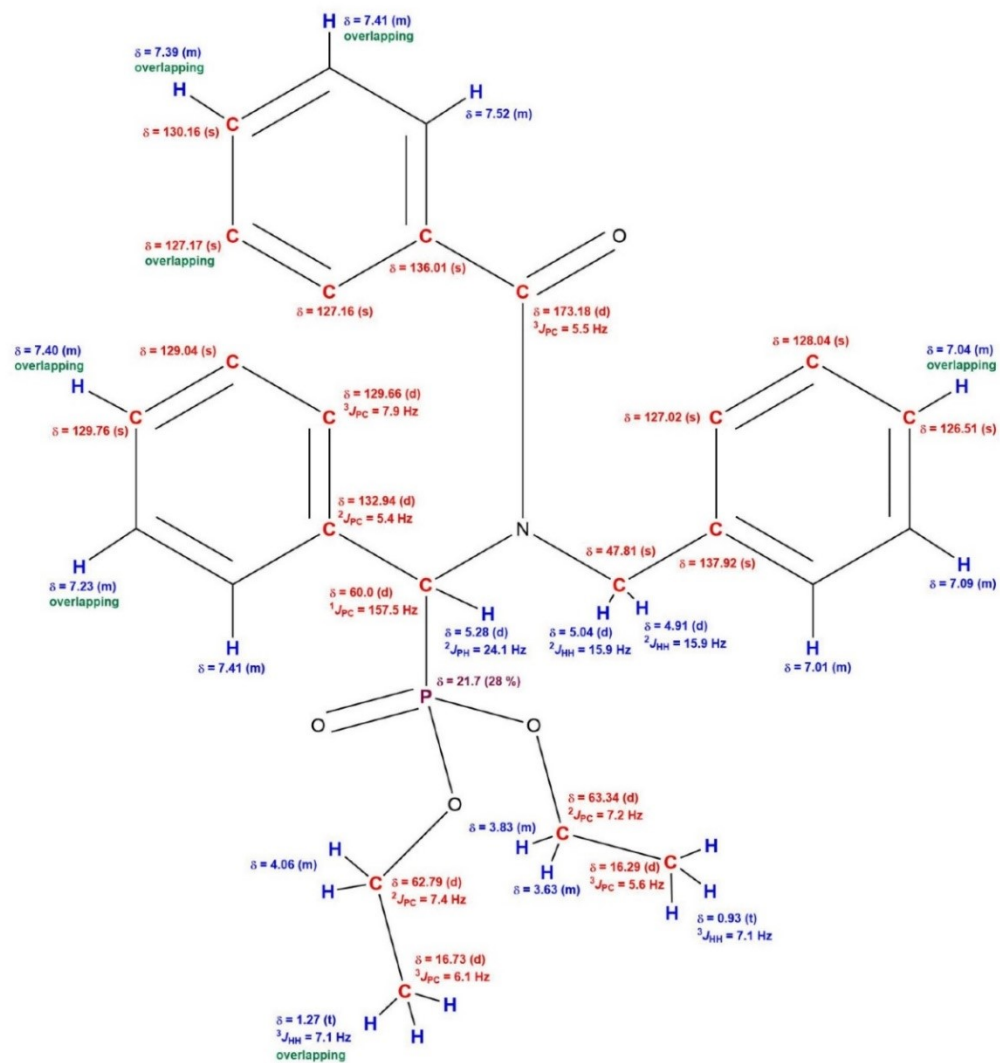

Supplement: d3ob00010a1.pdf [file d3ob00010a1.pdf]
