# Supplementary material for: New N-acyl- as well as N-phosphonoylmethyl- and N-phosphinoylmethyl-α-amino-benzylphosphonates by acylation and a tandem Kabachnik–Fields protocol
Source: Royal Society of Chemistry journal article supplement (doi:10.1039/d3ob00010a), 2023-01-01
Supplement: d3ob00010a2.pdf [file d3ob00010a2.pdf]

### Single Crystal X-Ray Diffraction Studies

Single crystals of compound **1**, suitable for X-ray diffraction, were obtained by slow evaporation of dichloromethane – methanol 97:3 solution. The crystals were introduced into perfluorinated oil and a suitable single crystal was carefully mounted on the top of a thin glass wire. Data collection was performed with an Oxford Xcalibur 3 diffractometer equipped with a Spellman generator (50 kV, 40 mA) and a Kappa CCD detector, operating with Mo-K $\alpha$  radiation ( $\lambda = 0.71071 \text{ \AA}$ ).

Data collection and data reduction were performed with the CrysAlisPro software.<sup>a)</sup> Absorption correction using the multiscan method<sup>a)</sup> was applied. The structures were solved with SHELXS-97,<sup>b)</sup> refined with SHELXL-97<sup>c)</sup> and finally checked using PLATON.<sup>d)</sup> Details for data collection and structure refinement are summarized in Table 1.

CCDC-2212310 contains supplementary crystallographic data for this compound. These data can be obtained free of charge from The Cambridge Crystallographic Data Centre *via* [www.ccdc.cam.ac.uk/data\\_request/cif](http://www.ccdc.cam.ac.uk/data_request/cif).

**Table 1.** Details for X-ray data collection and structure refinement for compound **1**.

|                                                           | <b>1</b>                                                        |
|-----------------------------------------------------------|-----------------------------------------------------------------|
| Empirical formula                                         | C <sub>14</sub> H <sub>22</sub> NO <sub>4</sub> P               |
| Formula mass                                              | 299.29                                                          |
| T[K]                                                      | 123(2)                                                          |
| Crystal size [mm]                                         | 0.40 × 0.20 × 0.10                                              |
| Crystal description                                       | colorless block                                                 |
| Crystal system                                            | triclinic                                                       |
| Space group                                               | <i>P</i> -1                                                     |
| a [Å]                                                     | 7.2778(2)                                                       |
| b [Å]                                                     | 10.1592(4)                                                      |
| c [Å]                                                     | 10.8460(4)                                                      |
| α [°]                                                     | 91.681(3)                                                       |
| β [°]                                                     | 102.741(3)                                                      |
| γ [°]                                                     | 101.624(3)                                                      |
| V [Å <sup>3</sup> ]                                       | 763.84(5)                                                       |
| Z                                                         | 2                                                               |
| ρ <sub>calcd.</sub> [g cm <sup>-3</sup> ]                 | 1.301                                                           |
| μ [mm <sup>-1</sup> ]                                     | 0.192                                                           |
| <i>F</i> (000)                                            | 320                                                             |
| Θ range [°]                                               | 2.05 – 25.24                                                    |
| Index ranges                                              | -9 ≤ <i>h</i> ≤ 9<br>-13 ≤ <i>k</i> ≤ 13<br>-14 ≤ <i>l</i> ≤ 14 |
| Reflns. collected                                         | 13665                                                           |
| Reflns. obsd.                                             | 3188                                                            |
| Reflns. unique                                            | 3790<br>( <i>R</i> <sub>int</sub> = 0.0306)                     |
| <i>R</i> <sub>1</sub> , <i>wR</i> <sub>2</sub> (2σ data)  | 0.0390, 0.0998                                                  |
| <i>R</i> <sub>1</sub> , <i>wR</i> <sub>2</sub> (all data) | 0.0486, 0.1072                                                  |
| GOOF on <i>F</i> <sup>2</sup>                             | 1.026                                                           |
| Peak/hole [e Å <sup>-3</sup> ]                            | 0.481 / -0.236                                                  |

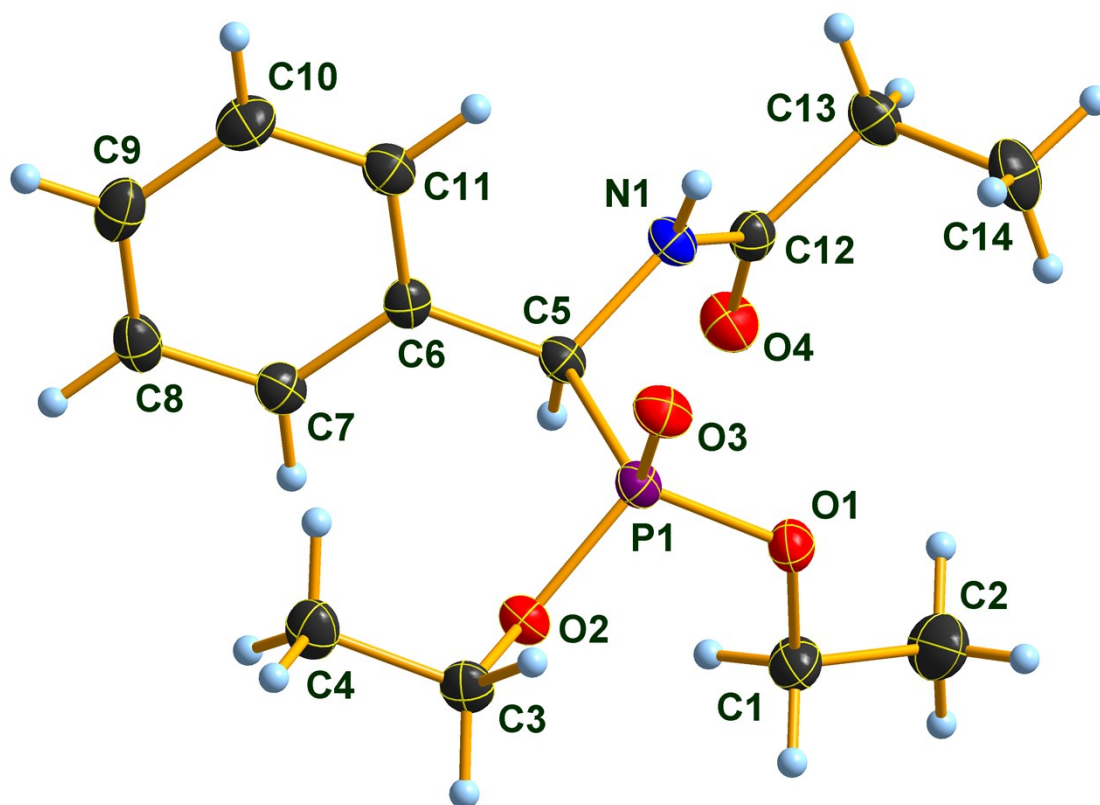

**Figure 1.** Molecular structure of compound **1** in the crystal. DIAMOND<sup>e)</sup> representation; thermal ellipsoids are drawn at 50 % probability level.

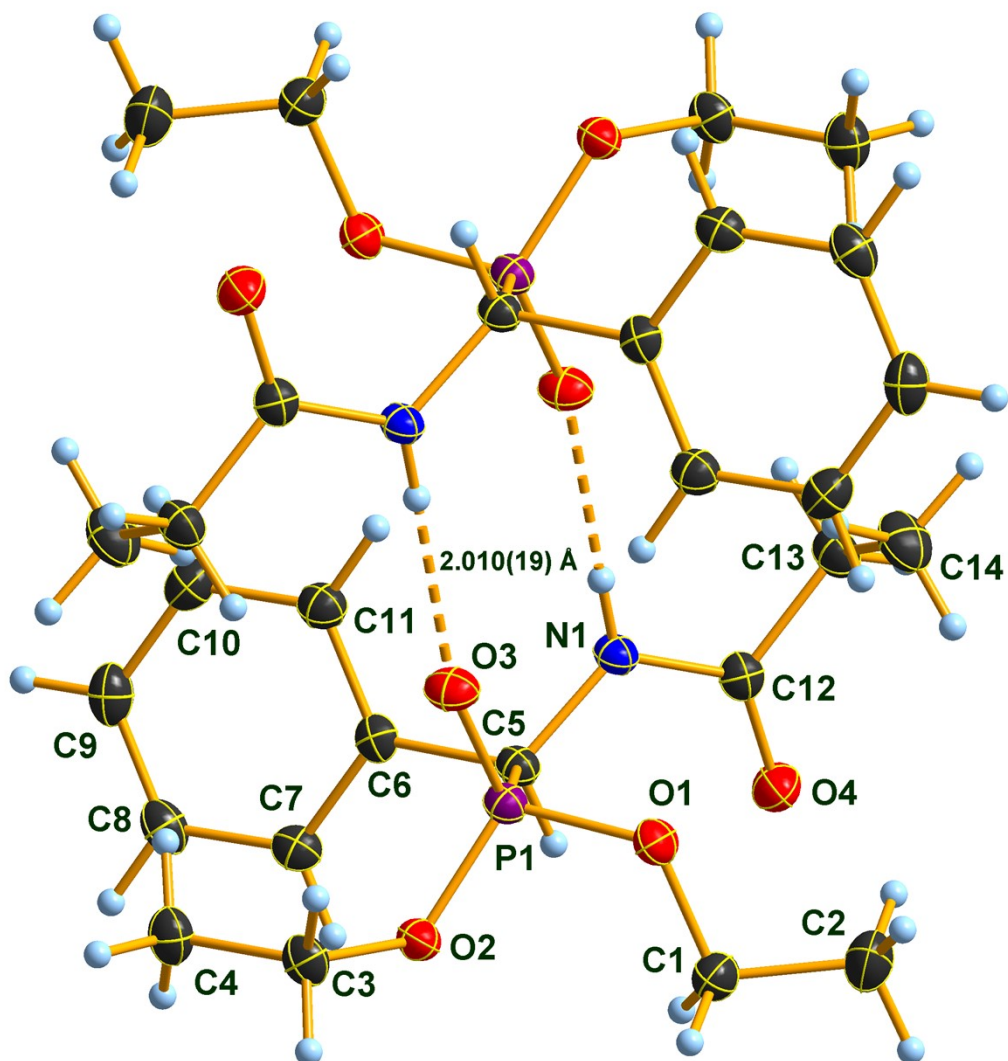

**Figure 2.** View of the hydrogen bonded dimers of compound **1** in the crystal. DIAMOND<sup>e</sup> representation; thermal ellipsoids are drawn at 50 % probability level. Symmetry code for the non labeled molecule:  $-x, -y, 1-z$ .

**Table 2.** Selected bond lengths (Å) of compound **1**.

|          |          |           |          |
|----------|----------|-----------|----------|
| P1 – O3  | 1.467(1) | C3 – C4   | 1.493(2) |
| P1 – O2  | 1.570(1) | C1 – C2   | 1.499(2) |
| P1 – O1  | 1.574(1) | C11 – C10 | 1.391(2) |
| P1 – C5  | 1.822(1) | C10 – C9  | 1.390(2) |
| O2 – C3  | 1.466(2) | C13 – C14 | 1.525(2) |
| O1 – C1  | 1.459(2) | C6 – C11  | 1.394(2) |
| C5 – N1  | 1.455(2) | C6 – C7   | 1.395(2) |
| C5 – C6  | 1.518(2) | C8 – C9   | 1.387(2) |
| O4 – C12 | 1.228(2) | C8 – C7   | 1.393(2) |

N1 – C12 1.356(2) C12 – C13 1.512(2)

**Table 3.** Selected bond angles (°) of compound **1**.

|                |          |                 |          |
|----------------|----------|-----------------|----------|
| O3 – P1 – O2   | 115.8(1) | O1 – C1 – C2    | 108.4(1) |
| O3 – P1 – O1   | 110.5(1) | C10 – C11 – C6  | 120.2(1) |
| O2 – P1 – O1   | 107.0(1) | C9 – C10 – C11  | 120.7(1) |
| O3 – P1 – C5   | 114.0(1) | C8 – C7 – C6    | 120.8(1) |
| O2 – P1 – C5   | 102.9(1) | C8 – C9 – C10   | 119.5(1) |
| O1 – P1 – C5   | 105.8(1) | C8 – C9 – H9    | 120.300  |
| C3 – O2 – P1   | 122.2(1) | N1 – C12 – C13  | 114.2(1) |
| C1 – O1 – P1   | 121.6(1) | C12 – C13 – C14 | 110.8(1) |
| N1 – C5 – C6   | 114.5(1) | C11 – C6 – C7   | 118.9(1) |
| N1 – C5 – P1   | 107.9(1) | C11 – C6 – C5   | 121.6(1) |
| C6 – C5 – P1   | 110.9(1) | C7 – C6 – C5    | 119.5(1) |
| C12 – N1 – C5  | 121.5(1) | C9 – C8 – C7    | 120.0(1) |
| O4 – C12 – N1  | 122.9(1) | O2 – C3 – C4    | 110.2(1) |
| O4 – C12 – C13 | 122.9(1) |                 |          |

**Table 4.** Selected torsion angles (°) of compound **1**.

|                     |           |                      |           |
|---------------------|-----------|----------------------|-----------|
| O3 – P1 – O2 – C3   | -10.7(1)  | O4 – C12 – C13 – C14 | -97.0(2)  |
| O1 – P1 – O2 – C3   | 113.1(1)  | N1 – C12 – C13 – C14 | 81.2(2)   |
| C5 – P1 – O2 – C3   | -135.7(1) | N1 – C5 – C6 – C11   | -31.5(2)  |
| O3 – P1 – O1 – C1   | 159.3(1)  | P1 – C5 – C6 – C11   | 90.9(1)   |
| O2 – P1 – O1 – C1   | 32.4(1)   | N1 – C5 – C6 – C7    | 150.9(1)  |
| C5 – P1 – O1 – C1   | -76.9(1)  | P1 – C5 – C6 – C7    | -86.7(1)  |
| O3 – P1 – C5 – N1   | 63.2(1)   | P1 – O2 – C3 – C4    | 100.6(1)  |
| O2 – P1 – C5 – N1   | -170.6(1) | P1 – O1 – C1 – C2    | 153.6(1)  |
| O1 – P1 – C5 – N1   | -58.5(1)  | C7 – C6 – C11 – C10  | -0.2(2)   |
| O3 – P1 – C5 – C6   | -62.9(1)  | C5 – C6 – C11 – C10  | -177.8(1) |
| O2 – P1 – C5 – C6   | 63.3(1)   | C6 – C11 – C10 – C9  | 0.9(2)    |
| O1 – P1 – C5 – C6   | 175.4(1)  | C9 – C8 – C7 – C6    | 0.9(2)    |
| C6 – C5 – N1 – C12  | -126.9(1) | C11 – C6 – C7 – C8   | -0.7(2)   |
| P1 – C5 – N1 – C12  | 109.0(1)  | C5 – C6 – C7 – C8    | 176.9(1)  |
| C5 – N1 – C12 – O4  | 5.5(2)    | C7 – C8 – C9 – C10   | -0.2(2)   |
| C5 – N1 – C12 – C13 | -172.7(1) | C11 – C10 – C9 – C8  | -0.7(2)   |

## References

- a) Program package 'CrysAlisPro 1.171.40.82a (Rigaku OD, 2020)'.

- b) Sheldrick, G. M. (1997) *SHELXS-97: Program for Crystal Structure Solution*, University of Göttingen, Germany.
- c) Sheldrick, G. M. (1997) *SHELXL-97: Program for the Refinement of Crystal Structures*, University of Göttingen, Germany.
- d) Spek, A. L. (1999) *PLATON: A Multipurpose Crystallographic Tool*, Utrecht University, Utrecht, The Netherlands.
- e) DIAMOND, Crystal Impact GbR., Version 3.2i.
